# Supplementary material for: Screening of electrode materials for ammonium ion batteries by high throughput calculation
Source: Royal Society of Chemistry journal article supplement (doi:10.1039/d3ra00284e), 2023-01-01
Supplement: d3ra00284e1.pdf [file d3ra00284e1.pdf]

## **Supporting information for:**

# **Screening of electrode materials for ammonium ion battery by high throughput calculation**

Sheqiang Han<sup>1</sup>, Xiaodong Zhang<sup>1</sup>, Qi Song<sup>1</sup>, Bo Zhou<sup>1,1</sup>, Shangwu Fan<sup>2</sup>

<sup>1</sup>Institute of Modern Physics, Shaanxi Key Laboratory for Theoretical Physics Frontiers, Northwest University, Xi'an 710069, People's Republic of China.

<sup>2</sup>Science and Technology on Thermostructural Composite Materials Laboratory, Northwestern Polytechnical University, Xi'an, Shaanxi 710072, People's Republic of China.

## **Summary**

This supporting information provides data during the screening process.

---

<sup>1</sup> E-mail: zhoubo@nwu.edu.cn

## Data Description

The basic data is derived from the compounds screened in the ICSD (version 2009). There are 120481 kinds of compounds.

### **The main steps of the filtering algorithm are as follows:**

Screening compounds containing  $K^+$  in the database and replacing  $K^+$  with  $NH_4^+$ , about 8221 compounds were obtained. Through bond valence energy landscape (BVLE) calculation, 441 compounds with diffusion barrier less than 0.3 eV were screened (Table S1).

For a robust framework and suitable chemical exchange route, 166 compounds with general formula of  $(NH_4)_aM_b(XY_c)_d$  (M - metal, in which, inactive metals such as Zn, Zr, Ga, Ge, Mg, Al etc for electrolyte and active transition metal such as Fe, Mn, Ti, Cr, V, Co, Ni, Nb, Mo, etc for electrode material;  $XY_c$  - polyanion groups, X - metalloids such as B, Si, Ge, As and Mo, Nb, etc, Y - O, F, S, etc) were screened (Table S2).

108 compounds were obtained after screening with a specific capacity greater than 100 mAh/g (Table S3).

After the first principle calculation, the 72 compounds (Table S4, S5, S6) were screened by using the condition that the open circuit voltage (OCV) was greater than 3 V. At the same time, Table S6 lists the volume expansion rate of the optimized structure is less than 10% compared with the K-contained analogue, and compounds less than 10% are finally selected.

The structure diagram, density of states diagrams and Structure parameters of 27 compounds finally selected is shown in Figures S1 to S27 and Tables S7 to S33.

**Table S1.** 441 compounds with diffusion barrier calculated by BVEL less than 0.3 eV were screened. ID is the ICSD Collection Code, STRU is the chemical formula and a, b and c are respectively the diffusion barrier values(eV) calculated by BVEL on the three axes.

| ICSD  | STRU                                                                                                                   | a    | b    | c    |
|-------|------------------------------------------------------------------------------------------------------------------------|------|------|------|
| 158   | (NH <sub>4</sub> ) <sub>4</sub> SnO <sub>4</sub>                                                                       | 0.23 | 0.24 | 0.24 |
| 228   | (NH <sub>4</sub> ) <sub>8</sub> SiW <sub>11</sub> O <sub>39</sub> (H <sub>2</sub> O) <sub>13</sub>                     | 0.25 | 0.25 | 0.25 |
| 266   | (NH <sub>4</sub> ) <sub>6</sub> (HgS <sub>4</sub> )                                                                    | 0.30 | 0.30 | 0.23 |
| 491   | (NH <sub>4</sub> ) <sub>2</sub> Cr <sub>8</sub> O <sub>16</sub>                                                        | -    | 0.03 | -    |
| 1120  | (NH <sub>4</sub> ) <sub>2</sub> (Zn <sub>6</sub> O <sub>7</sub> )                                                      | -    | -    | 0.16 |
| 1486  | NH <sub>4</sub> VO <sub>3</sub>                                                                                        | -    | 1.83 | 0.14 |
| 1512  | (NH <sub>4</sub> ) <sub>3</sub> (MoO <sub>4</sub> )(ReO <sub>4</sub> )                                                 | 0.31 | 0.29 | 2.09 |
| 1562  | NH <sub>4</sub> (Ru <sub>4</sub> O <sub>8</sub> )                                                                      | -    | -    | 0.02 |
| 1564  | (NH <sub>4</sub> ) <sub>4</sub> PbO <sub>3</sub>                                                                       | -    | 0.06 | 0.44 |
| 1570  | NH <sub>4</sub> TiO                                                                                                    | 0.50 | 0.19 | 0.63 |
| 2060  | (NH <sub>4</sub> ) <sub>3</sub> (Sb <sub>5</sub> O <sub>14</sub> )                                                     | 0.70 | 0.05 | 0.70 |
| 2061  | (NH <sub>4</sub> ) <sub>2</sub> Sb <sub>4</sub> O <sub>11</sub>                                                        | 0.16 | 0.16 | 0.11 |
| 2155  | (NH <sub>4</sub> ) <sub>4</sub> (Si <sub>8</sub> O <sub>18</sub> )                                                     | 0.85 | 0.16 | 2.44 |
| 2266  | (NH <sub>4</sub> ) <sub>2</sub> (PbO <sub>2</sub> )                                                                    | 0.44 | 0.44 | 0.29 |
| 2269  | (NH <sub>4</sub> ) <sub>6</sub> Ga <sub>2</sub> O <sub>6</sub>                                                         | 0.10 | 0.19 | 0.26 |
| 2488  | (NH <sub>4</sub> ) <sub>6</sub> (Mn <sub>2</sub> O <sub>6</sub> )                                                      | 0.33 | 0.15 | 0.28 |
| 4138  | (NH <sub>4</sub> ) <sub>3</sub> (VO <sub>4</sub> )                                                                     | 0.28 | 0.28 | 0.28 |
| 4160  | (NH <sub>4</sub> ) <sub>4</sub> SiW <sub>12</sub> O <sub>40</sub>                                                      | -    | 0.14 | 0.61 |
| 4187  | (NH <sub>4</sub> ) <sub>2</sub> ((NH <sub>4</sub> ) <sub>0.5</sub> Sm <sub>0.5</sub> )(MoO <sub>4</sub> ) <sub>2</sub> | 0.26 | 0.26 | -    |
| 4188  | NH <sub>4</sub> Ga <sub>0.33</sub> W <sub>5.66</sub> O <sub>18</sub>                                                   | -    | -    | 0.03 |
| 4215  | (NH <sub>4</sub> ) <sub>3</sub> SbS <sub>3</sub> (Sb <sub>2</sub> O <sub>3</sub> ) <sub>3</sub>                        | 3.26 | 3.26 | 0.08 |
| 6149  | (NH <sub>4</sub> ) <sub>6</sub> (Fe <sub>2</sub> O <sub>6</sub> )                                                      | 0.10 | 0.22 | 0.29 |
| 6153  | (NH <sub>4</sub> ) <sub>6</sub> (Co <sub>2</sub> O <sub>7</sub> )                                                      | 0.18 | 0.29 | 0.29 |
| 6158  | (NH <sub>4</sub> ) <sub>2</sub> PdO <sub>2</sub>                                                                       | 0.50 | 0.50 | 0.30 |
| 6199  | NH <sub>4</sub> (TiO)(PO <sub>4</sub> )                                                                                | 0.66 | 0.23 | 0.66 |
| 9009  | NH <sub>4</sub> GaO <sub>2</sub>                                                                                       | 0.24 | 0.37 | 0.29 |
| 10290 | NH <sub>4</sub> (NO <sub>3</sub> )                                                                                     | 1.12 | 1.12 | 0.27 |
| 10363 | NH <sub>4</sub> NiCrF <sub>6</sub>                                                                                     | 0.05 | 0.05 | 0.05 |
| 10491 | NH <sub>4</sub> (TiNbO <sub>5</sub> )                                                                                  | 0.09 | 0.65 | -    |
| 10492 | (NH <sub>4</sub> ) <sub>0.85</sub> Ti <sub>0.85</sub> Nb <sub>1.15</sub> O <sub>5</sub>                                | 0.08 | 0.71 | -    |
| 10497 | NH <sub>4</sub> TiTaO <sub>5</sub>                                                                                     | 0.12 | 0.31 | -    |
| 14157 | (NH <sub>4</sub> ) <sub>3</sub> Ni <sub>2</sub> O <sub>4</sub>                                                         | 0.53 | 0.53 | 0.21 |
| 14158 | (NH <sub>4</sub> ) <sub>3</sub> Pt <sub>2</sub> O <sub>4</sub>                                                         | 0.45 | 0.45 | 0.17 |
| 14162 | (NH <sub>4</sub> ) <sub>9</sub> Ni <sub>2</sub> O <sub>7</sub>                                                         | -    | 0.24 | 0.24 |
| 15095 | NH <sub>4</sub> (CuO <sub>2</sub> )                                                                                    | 0.04 | -    | 0.14 |
| 15115 | NH <sub>4</sub> AuO <sub>2</sub>                                                                                       | 0.92 | 2.49 | 0.14 |
| 15157 | NH <sub>4</sub> PrO <sub>2</sub>                                                                                       | 0.17 | 0.17 | -    |

|       |                                                                |      |      |      |
|-------|----------------------------------------------------------------|------|------|------|
| 15517 | $\text{NH}_4\text{Ti}_3\text{TaO}_9$                           | 3.49 | 0.26 | -    |
| 15518 | $(\text{NH}_4)_3\text{TiTa}_7\text{O}_{21}$                    | 0.26 | 0.26 | -    |
| 15643 | $\text{NH}_4\text{Ni}(\text{CrF}_6)$                           | 0.04 | 0.04 | 0.04 |
| 15770 | $\text{NH}_4\text{CoO}_2$                                      | 0.26 | 0.25 | -    |
| 15929 | $(\text{NH}_4)_2\text{PbO}_3$                                  | 0.23 | 0.23 | 0.76 |
| 16005 | $(\text{NH}_4)_3(\text{B}_3\text{O}_6)$                        | 0.83 | 0.83 | 0.28 |
| 16154 | $(\text{NH}_4)_2(\text{MoO}_4)$                                | 0.93 | 0.21 | 0.32 |
| 16223 | $(\text{NH}_4)_2\text{Cd}_2\text{O}_3$                         | 0.61 | 0.14 | 0.14 |
| 16264 | $(\text{NH}_4)_2(\text{ZrO}_3)$                                | 0.07 | 0.48 | 0.27 |
| 16265 | $(\text{NH}_4)_2(\text{SnO}_3)$                                | 0.08 | 0.45 | 0.36 |
| 16534 | $(\text{NH}_4)_6(\text{Fe}_2\text{O}_6)$                       | 0.10 | 0.21 | 0.29 |
| 16557 | $\text{NH}_4\text{TiNbO}_5$                                    | 0.09 | 0.65 | -    |
| 16690 | $\text{NH}_4(\text{ClO}_3)$                                    | 0.30 | 0.38 | -    |
| 17064 | $(\text{NH}_4)_6(\text{Si}_2\text{O}_7)$                       | 0.18 | 0.31 | 0.31 |
| 18022 | $\text{NH}_4\text{Zn}(\text{BeF}_3)_3$                         | 3.06 | 3.06 | 0.30 |
| 18034 | $\text{NH}_4\text{NiAlF}_6$                                    | 0.12 | 0.12 | 0.12 |
| 18064 | $\text{NH}_4\text{Nb}(\text{WO}_6)$                            | 0.07 | 0.07 | 0.07 |
| 18301 | $(\text{NH}_4)_2(\text{Zr}_2\text{O}_5)$                       | 0.11 | 0.37 | 0.24 |
| 20021 | $\text{NH}_4\text{HgI}_3\text{H}_2\text{O}$                    | -    | -    | 0.09 |
| 20141 | $(\text{NH}_4)_2\text{UO}_4$                                   | 0.27 | 0.27 | -    |
| 20478 | $\text{NH}_4\text{Y}(\text{MoO}_4)_2$                          | 0.10 | -    | 0.72 |
| 20510 | $(\text{NH}_4)_2(\text{UO}_4)$                                 | 0.24 | 0.24 | -    |
| 20569 | $(\text{NH}_4\text{Cl})_2\text{HgCl}_2\text{H}_2\text{O}$      | 1.75 | 1.75 | 0.27 |
| 20970 | $\text{NH}_4(\text{TiO})(\text{PO}_4)$                         | 0.66 | 0.23 | 0.66 |
| 21069 | $(\text{NH}_4)_2\text{NiO}_2$                                  | 0.16 | 0.16 | -    |
| 22063 | $(\text{NH}_4)_2\text{PbO}_3$                                  | -    | 0.31 | 0.19 |
| 23184 | $(\text{NH}_4)_2\text{MnF}_4$                                  | 0.04 | 0.04 | -    |
| 23426 | $\text{NH}_4\text{Cr}_{0.333}\text{W}_{1.667}\text{O}_6$       | 0.06 | 0.06 | 0.06 |
| 23588 | $\text{NH}_4(\text{FeF}_4)$                                    | -    | 0.25 | -    |
| 23633 | $(\text{NH}_4)_4\text{Be}_2\text{O}_4$                         | 0.26 | 0.26 | 0.26 |
| 24131 | $(\text{NH}_4)_2(\text{SnO}_3)$                                | 0.34 | 0.34 | 0.12 |
| 24818 | $\text{NH}_4\text{AgO}$                                        | 0.82 | 0.82 | 0.19 |
| 25004 | $(\text{NH}_4)_2\text{CdO}_2$                                  | -    | -    | 0.06 |
| 25744 | $\text{NH}_4\text{AgO}$                                        | 0.81 | 0.81 | 0.29 |
| 26147 | $\text{NH}_4(\text{PO}_3)$                                     | 0.69 | 0.30 | 0.70 |
| 26181 | $(\text{NH}_4)_2(\text{WO}_4)$                                 | 0.80 | 0.20 | 0.31 |
| 26258 | $(\text{NH}_4)_2\text{PtS}_2$                                  | 1.04 | 1.04 | 0.28 |
| 26547 | $(\text{NH}_4)_2\text{H}_5(\text{PO}_4)(\text{P}_2\text{O}_7)$ | -    | 0.14 | 0.20 |
| 26632 | $\text{NH}_4\text{Ag}(\text{CO}_3)$                            | -    | 0.26 | 0.26 |
| 26735 | $(\text{NH}_4)_2\text{S}$                                      | 0.15 | 0.15 | 0.15 |
| 27410 | $(\text{NH}_4)_2(\text{HgO}_2)$                                | 0.15 | 0.15 | -    |
| 27584 | $\text{NH}_4\text{Na}_3(\text{Al}_4\text{Si}_4\text{O}_{16})$  | 2.93 | 2.93 | 0.21 |
| 27596 | $\text{NH}_4\text{Na}_3(\text{Al}_4\text{Si}_4\text{O}_{16})$  | 2.89 | 2.88 | 0.21 |
| 28408 | $(\text{NH}_4)_3\text{Sb}_5\text{O}_{14}$                      | 0.74 | 0.08 | 0.76 |

|       |                                                                                                                                                                                    |      |      |      |
|-------|------------------------------------------------------------------------------------------------------------------------------------------------------------------------------------|------|------|------|
| 28493 | $\text{NH}_4\text{Sb}_3\text{O}_5$                                                                                                                                                 | 1.55 | 1.75 | 0.27 |
| 30247 | $(\text{NH}_4)_2\text{Pb}_2\text{Ge}_2\text{O}_7$                                                                                                                                  | 0.13 | 0.13 | -    |
| 30886 | $\text{NH}_4\text{Cu}(\text{PO}_4)$                                                                                                                                                | -    | 0.14 | 0.22 |
| 30910 | $\text{NaNH}_4\text{GeO}_3$                                                                                                                                                        | -    | 0.17 | 2.00 |
| 30945 | $(\text{NH}_4)_2\text{GeO}_3$                                                                                                                                                      | -    | 0.49 | 0.14 |
| 30964 | $\text{NH}_4\text{LiO}$                                                                                                                                                            | -    | 0.21 | 0.20 |
| 31021 | $\text{NH}_4\text{AgCO}_3$                                                                                                                                                         | -    | 0.26 | 0.26 |
| 31285 | $(\text{Na}_{0.14}(\text{NH}_4)_{0.86})(\text{Mg}_{1.44}\text{Fe}_{0.56})(\text{Mg}_{0.23}\text{Fe}_{0.16}\text{Al}_{2.61})$<br>$(\text{Si}_{10.36}\text{Al}_{1.64}\text{O}_{30})$ | 2.22 | 2.22 | 0.24 |
| 31686 | $(\text{NH}_4)_3(\text{B}_3\text{O}_6)$                                                                                                                                            | 0.23 | 0.23 | 0.23 |
| 31983 | $\text{NH}_4\text{MnO}_2$                                                                                                                                                          | 0.30 | 0.15 | 0.95 |
| 32023 | $(\text{NH}_4)_{5.52}\text{Ta}_{15.76}\text{O}_{42.00}$                                                                                                                            | 0.20 | 0.20 | 3.45 |
| 32743 | $\text{NH}_4\text{NaO}$                                                                                                                                                            | 0.10 | 0.10 | -    |
| 33294 | $(\text{NH}_4)_4(\text{WO}_5)$                                                                                                                                                     | 0.27 | 0.14 | 0.27 |
| 33706 | $\text{NH}_4(\text{VO}_3)$                                                                                                                                                         | 0.11 | 1.68 | -    |
| 33797 | $\text{Rb}_2(\text{NH}_4)_4((\text{CoO}_2)\text{O}(\text{CoO}_2))$                                                                                                                 | 0.28 | 0.28 | -    |
| 33808 | $(\text{NH}_4)_4(\text{Be}_3\text{O}_5)$                                                                                                                                           | 0.15 | 0.15 | 0.36 |
| 33920 | $(\text{NH}_4)_3\text{OBr}$                                                                                                                                                        | 0.21 | 0.21 | 0.21 |
| 34392 | $(\text{NH}_4)_6(\text{Mn}_2\text{O}_6)$                                                                                                                                           | 0.34 | 0.16 | 0.28 |
| 34446 | $\text{NH}_4(\text{H}_2\text{PO}_4)$                                                                                                                                               | 0.22 | 0.22 | 0.22 |
| 34603 | $(\text{NH}_4)_2\text{ZnO}_2$                                                                                                                                                      | 0.31 | -    | 0.04 |
| 34958 | $\text{NH}_4\text{ScO}_2$                                                                                                                                                          | 0.17 | 0.17 | -    |
| 35030 | $(\text{NH}_4)_4\text{Nb}_6\text{O}_{17}$                                                                                                                                          | 0.33 | -    | 0.16 |
| 35367 | $(\text{NH}_4)_6(\text{Co}_2\text{O}_7)$                                                                                                                                           | 0.19 | 0.30 | 0.30 |
| 35463 | $(\text{NH}_4)_4(\text{Mo}_8\text{P}_{12}\text{O}_{52})$                                                                                                                           | 0.07 | 1.97 | 0.07 |
| 36202 | $\text{NH}_4(\text{NO}_2)$                                                                                                                                                         | 0.08 | 0.08 | -    |
| 36380 | $(\text{NH}_4)_2\text{Na}(\text{FeO}_3)$                                                                                                                                           | 0.27 | 0.12 | 0.53 |
| 36612 | $(\text{NH}_4)_2\text{Na}_4((\text{FeO}_3)_2)$                                                                                                                                     | 2.75 | 0.30 | 2.75 |
| 37204 | $(\text{NH}_4)_3(\text{NO}_3)$                                                                                                                                                     | 0.26 | 0.26 | 0.57 |
| 37268 | $(\text{NH}_4)_4\text{PbO}_4$                                                                                                                                                      | 0.26 | 0.25 | 0.26 |
| 37271 | $(\text{NH}_4)_4\text{GeO}_4$                                                                                                                                                      | 0.21 | 0.21 | 0.20 |
| 37324 | $\text{NH}_4\text{AgO}$                                                                                                                                                            | 0.81 | 0.81 | 0.18 |
| 37325 | $\text{NH}_4\text{CuO}$                                                                                                                                                            | 0.73 | 0.73 | 0.20 |
| 38005 | $\text{Na}_{0.98}(\text{NH}_4)_{0.02}\text{NbO}_3$                                                                                                                                 | 0.32 | 0.88 | 0.26 |
| 38301 | $(\text{NH}_4)_2\text{SnS}_3(\text{H}_2\text{O})_2$                                                                                                                                | 0.30 | 0.80 | 0.80 |
| 38325 | $\text{Na}(\text{NH}_4)_3\text{Th}_2\text{O}_6$                                                                                                                                    | 0.11 | 0.11 | -    |
| 39440 | $\text{NH}_4\text{CrPO}_4\text{F}$                                                                                                                                                 | 1.00 | 0.29 | 1.00 |
| 39463 | $\text{NH}_4\text{SbO}(\text{GeO}_4)$                                                                                                                                              | 0.56 | 0.56 | 0.13 |
| 39560 | $\text{NH}_4\text{FeF}(\text{PO}_4)$                                                                                                                                               | 1.08 | 1.08 | 0.28 |
| 39561 | $\text{NH}_4(\text{TiO})(\text{PO}_4)$                                                                                                                                             | 0.67 | 0.67 | 0.24 |
| 39585 | $\text{NH}_4\text{TaO}(\text{GeO}_4)$                                                                                                                                              | 0.40 | 0.40 | 0.13 |
| 39697 | $(\text{NH}_4)_2(\text{Zr}_{0.86}\text{Ti}_{0.14})(\text{Si}_3)$                                                                                                                   | 0.85 | 0.85 | 0.23 |

|       |                                                                                                                                                                                                       |      |      |      |
|-------|-------------------------------------------------------------------------------------------------------------------------------------------------------------------------------------------------------|------|------|------|
|       | O <sub>9</sub> )(H <sub>2</sub> O)                                                                                                                                                                    |      |      |      |
| 39735 | NH <sub>4</sub> GeOPO <sub>4</sub>                                                                                                                                                                    | 0.91 | 0.91 | 0.26 |
| 39882 | NH <sub>4</sub> (Ge <sub>0.063</sub> Ti <sub>0.937</sub> O)(P<br>O <sub>4</sub> )                                                                                                                     | 0.68 | 0.68 | 0.23 |
| 39950 | NH <sub>4</sub> (Ge <sub>0.042</sub> Ti <sub>0.958</sub> O)(P<br>O <sub>4</sub> )                                                                                                                     | 0.67 | 0.68 | 0.23 |
| 39951 | NH <sub>4</sub> (Ge <sub>0.184</sub> Ti <sub>0.816</sub> O)(P<br>O <sub>4</sub> )                                                                                                                     | 0.69 | 0.69 | 0.23 |
| 40154 | NH <sub>4</sub> AgO                                                                                                                                                                                   | 0.81 | 0.81 | 0.18 |
| 40158 | NH <sub>4</sub> CuO                                                                                                                                                                                   | 0.73 | 0.73 | 0.17 |
| 40266 | NH <sub>4</sub> PrO <sub>2</sub>                                                                                                                                                                      | 0.18 | 0.18 | -    |
| 40267 | NH <sub>4</sub> CrO <sub>2</sub>                                                                                                                                                                      | 0.27 | 0.27 | -    |
| 40430 | (NH <sub>4</sub> ) <sub>2</sub> PtSe <sub>2</sub>                                                                                                                                                     | 1.29 | 1.29 | 0.27 |
| 40819 | (NH <sub>4</sub> ) <sub>0.6</sub> VS <sub>2</sub>                                                                                                                                                     | 0.09 | 0.09 | -    |
| 44528 | NH <sub>4</sub> (VO <sub>3</sub> )                                                                                                                                                                    | 0.13 | 1.94 | -    |
| 47105 | NH <sub>4</sub> Na <sub>2</sub> (CuO <sub>2</sub> )                                                                                                                                                   | 0.25 | 0.25 | -    |
| 47218 | (NH <sub>4</sub> ) <sub>6</sub> (HgS <sub>4</sub> )                                                                                                                                                   | 0.29 | 0.29 | 0.23 |
| 47223 | (NH <sub>4</sub> ) <sub>4</sub> (IrO <sub>4</sub> )                                                                                                                                                   | 0.26 | 0.26 | 0.36 |
| 48118 | NH <sub>4</sub> Na <sub>4</sub> (GaO <sub>4</sub> )                                                                                                                                                   | 0.38 | 0.13 | 2.46 |
| 48119 | Cs(NH <sub>4</sub> ) <sub>4</sub> (GaO <sub>4</sub> )                                                                                                                                                 | -    | 0.06 | -    |
| 48169 | (NH <sub>4</sub> ) <sub>5</sub> (TiO <sub>4</sub> )                                                                                                                                                   | -    | 0.08 | 0.24 |
| 48177 | NH <sub>4</sub> Li <sub>2</sub> (BO <sub>3</sub> )                                                                                                                                                    | 1.72 | 0.26 | 1.72 |
| 48180 | (NH <sub>4</sub> ) <sub>3</sub> CuO <sub>2</sub>                                                                                                                                                      | -    | 0.11 | 0.11 |
| 49008 | NH <sub>4</sub> CuS                                                                                                                                                                                   | 0.49 | 0.18 | 0.18 |
| 52376 | NH <sub>4</sub> (NO <sub>3</sub> )                                                                                                                                                                    | 0.20 | 0.24 | 0.24 |
| 54149 | (NH <sub>4</sub> ) <sub>0.97</sub> ((Ti <sub>0.97</sub> Nb <sub>0.03</sub> )<br>O)(PO <sub>4</sub> )                                                                                                  | 0.71 | 0.71 | 0.26 |
| 55856 | (NH <sub>4</sub> ) <sub>7</sub> (H <sub>3</sub> O) <sub>5</sub> (As <sub>2</sub> W <sub>18</sub> C<br>e <sub>3</sub> O <sub>71</sub> (H <sub>2</sub> O) <sub>3</sub> )(H <sub>2</sub> O) <sub>9</sub> | -    | 0.45 | 0.25 |
| 56869 | NH <sub>4</sub> (Sb <sub>2</sub> PO <sub>8</sub> )                                                                                                                                                    | -    | 3.21 | 0.27 |
| 59281 | (NH <sub>4</sub> ) <sub>2</sub> MgWO <sub>2</sub> (PO <sub>4</sub> ) <sub>2</sub>                                                                                                                     | 0.53 | 0.49 | 0.29 |
| 59285 | NH <sub>4</sub> (TiO)(PO <sub>4</sub> )                                                                                                                                                               | 0.67 | 0.67 | 0.24 |
| 59820 | NH <sub>4</sub> Sc(HAsO <sub>4</sub> ) <sub>2</sub>                                                                                                                                                   | 0.15 | -    | 0.15 |
| 59887 | (NH <sub>4</sub> ) <sub>3</sub> Bi <sub>2</sub> (AsO <sub>4</sub> ) <sub>3</sub>                                                                                                                      | -    | 0.63 | 0.26 |
| 60103 | (NH <sub>4</sub> ) <sub>2</sub> GeO <sub>3</sub>                                                                                                                                                      | -    | 0.48 | 0.14 |
| 60439 | (NH <sub>4</sub> ) <sub>2</sub> S                                                                                                                                                                     | 0.13 | 0.13 | 0.13 |
| 60440 | (NH <sub>4</sub> ) <sub>2</sub> Se                                                                                                                                                                    | 0.16 | 0.16 | 0.16 |
| 60441 | (NH <sub>4</sub> ) <sub>2</sub> Te                                                                                                                                                                    | 0.17 | 0.17 | 0.17 |
| 60525 | NH <sub>4</sub> (AlF <sub>4</sub> )                                                                                                                                                                   | 0.28 | -    | -    |
| 60615 | NH <sub>4</sub> (FeF <sub>4</sub> )                                                                                                                                                                   | 0.23 | -    | 3.21 |
| 60651 | (NH <sub>4</sub> ) <sub>6</sub> (Ge <sub>2</sub> O <sub>7</sub> )                                                                                                                                     | 0.18 | 0.30 | 0.29 |
| 61038 | (NH <sub>4</sub> ) <sub>2</sub> Mn <sub>2</sub> O <sub>3</sub>                                                                                                                                        | 0.68 | 0.19 | 0.19 |
| 61105 | (NH <sub>4</sub> ) <sub>0.08</sub> YClO <sub>0.82</sub>                                                                                                                                               | 0.14 | 0.14 | -    |
| 61221 | (NH <sub>4</sub> ) <sub>0.26</sub> WO <sub>3</sub>                                                                                                                                                    | -    | -    | 0.03 |

|       |                                                                                   |      |      |      |
|-------|-----------------------------------------------------------------------------------|------|------|------|
| 61222 | $(\text{NH}_4)_{0.26}\text{WO}_3$                                                 | -    | -    | 0.03 |
| 61378 | $(\text{NH}_4)_2\text{Ru}_8\text{O}_{16}$                                         | -    | -    | 0.02 |
| 61388 | $\text{NH}_4(\text{Sb}_2\text{PO}_8)$                                             | -    | 3.06 | 0.28 |
| 61403 | $\text{NH}_4\text{NaMnO}_2$                                                       | 0.38 | 0.38 | 0.27 |
| 62053 | $(\text{NH}_4)_6\text{CdO}_4$                                                     | -    | -    | 0.05 |
| 62064 | $\text{Cs}(\text{NH}_4)_2\text{AuO}_2$                                            | 0.63 | 0.21 | 0.32 |
| 62102 | $(\text{NH}_4)_9\text{Li}_3(\text{IO}_6)_2\text{O}$                               | 0.50 | 0.50 | 0.10 |
| 62130 | $(\text{NH}_4)_2\text{Nb}_{10}\text{W}_7\text{O}_{47}$                            | -    | 0.14 | -    |
| 62136 | $(\text{NH}_4)_2\text{Na}_4(\text{GaO}_3)_2$                                      | 2.84 | 0.29 | 2.84 |
| 62138 | $(\text{NH}_4)_2\text{PbO}_3$                                                     | 0.52 | 0.30 | 0.13 |
| 62146 | $(\text{NH}_4)_2\text{Zn}_3\text{O}_4$                                            | 2.68 | 2.68 | 0.13 |
| 62166 | $(\text{NH}_4)_3(\text{Sb}_3\text{P}_2\text{O}_{14})$                             | 0.04 | 0.04 | -    |
| 62287 | $\text{NH}_4\text{Mn}_4(\text{PO}_4)_3$                                           | -    | -    | 0.21 |
| 62650 | $\text{Na}_4(\text{NH}_4)_2(\text{Ge}_2\text{O}_7)$                               | 0.22 | 0.26 | 3.08 |
| 62656 | $(\text{NH}_4)_4(\text{ZnO}_3)$                                                   | 0.19 | 0.19 | 0.19 |
| 63048 | $(\text{NH}_4)_3\text{Ho}(\text{Si}_3\text{O}_9)$                                 | 0.50 | 0.51 | 0.08 |
| 63489 | $(\text{NH}_4)_3\text{Na}_2(\text{InO}_4)$                                        | 0.26 | 0.26 | 0.26 |
| 63544 | $\text{NH}_4\text{Ni}(\text{AsO}_4)$                                              | 0.17 | 0.17 | -    |
| 63563 | $(\text{NH}_4)_{1.88}\text{Nb}(\text{WO}_6)$                                      | 0.01 | 0.01 | 0.01 |
| 65163 | $\text{NH}_4(\text{OD})$                                                          | 0.27 | 0.18 | 0.27 |
| 65164 | $\text{NH}_4(\text{OD})$                                                          | 0.27 | 0.18 | 0.27 |
| 65260 | $\text{NH}_4\text{Li}_4(\text{AlO}_4)$                                            | 0.15 | -    | -    |
| 65291 | $(\text{NH}_4)_3(\text{LiSiO}_4)$                                                 | -    | 0.27 | 0.34 |
| 65345 | $(\text{NH}_4)_6\text{Lu}_2(\text{Si}_6\text{O}_{18})$                            | 0.44 | 0.47 | 0.08 |
| 65420 | $\text{NH}_4(\text{Mo}_2\text{P}_3\text{O}_{13})$                                 | 2.05 | 0.06 | 0.06 |
| 65448 | $(\text{NH}_4)_6(\text{MnS}_4)$                                                   | 0.29 | 0.29 | 0.27 |
| 65453 | $(\text{NH}_4)_2(\text{MnS}_2)$                                                   | 0.77 | 0.77 | 0.18 |
| 65456 | $(\text{NH}_4)_2(\text{MnSe}_2)$                                                  | 0.97 | 0.97 | 0.29 |
| 65644 | $(\text{NH}_4)_2\text{Tm}_{23.33}\text{S}_{36}$                                   | -    | -    | 0.21 |
| 65656 | $\text{NH}_4\text{Mo}(\text{P}_2\text{O}_7)$                                      | 2.77 | 2.13 | 0.28 |
| 65682 | $\text{NH}_4\text{MoW}(\text{P}_3\text{O}_{12})$                                  | -    | 0.25 | 1.68 |
| 65942 | $\text{Cs}_2(\text{NH}_4)_4(\text{Fe}_2\text{O}_5)$                               | 0.24 | -    | 0.29 |
| 65976 | $(\text{NH}_4)_{11}(\text{Li}(\text{MnO}_4)_4)$                                   | 0.30 | 0.30 | 0.47 |
| 65978 | $(\text{NH}_4)_3\text{Na}_2(\text{LiTeO}_6)$                                      | 0.21 | -    | 0.11 |
| 66073 | $(\text{NH}_4)_4(\text{SiO}_4)$                                                   | 0.20 | 0.13 | 0.15 |
| 66275 | $(\text{NH}_4)_2(\text{HgO}_2)$                                                   | 0.14 | 0.14 | -    |
| 66570 | $\text{NH}_4(\text{TiO})(\text{PO}_4)$                                            | 0.66 | 0.66 | 0.23 |
| 66774 | $(\text{NH}_4)_6(\text{Ti}_2\text{O}_7)$                                          | 0.18 | 0.33 | 0.33 |
| 67120 | $(\text{NH}_4)_{0.84}(\text{Nb}_{0.08}\text{Ti}_{0.92})\text{O}$<br>$\text{PO}_4$ | 0.66 | 0.66 | 0.22 |
| 67170 | $(\text{NH}_4)_{14}(\text{Fe}_4\text{O}_{13})$                                    | -    | 0.18 | 0.07 |
| 67284 | $(\text{NH}_4)_2(\text{W}_2\text{O}_7)$                                           | 1.19 | -    | 0.16 |
| 67387 | $(\text{NH}_4)_2\text{CoS}_2$                                                     | 0.91 | 0.91 | 0.21 |
| 67390 | $(\text{NH}_4)_2\text{CoSe}_2$                                                    | 1.05 | 1.05 | 0.29 |



|       |                                                                                                    |      |      |      |
|-------|----------------------------------------------------------------------------------------------------|------|------|------|
| 67396 | $(\text{NH}_4)_6(\text{Ti}_2\text{O}_7)$                                                           | 0.18 | 0.33 | 0.33 |
| 67397 | $(\text{NH}_4)_6(\text{Ti}_2\text{O}_7)$                                                           | 0.23 | 0.35 | 0.35 |
| 67738 | $(\text{NH}_4)_2\text{O}(\text{Nb}_2\text{O}_5)_7$                                                 | -    | -    | 0.04 |
| 67961 | $(\text{NH}_4)_{14}(\text{In}_4\text{O}_{13})$                                                     | -    | 0.18 | 0.07 |
| 68361 | $(\text{NH}_4)_8(\text{U}_2\text{O}_{10})$                                                         | 0.20 | 0.20 | 0.13 |
| 68496 | $(\text{NH}_4)_{0.75}\text{MoNbO}(\text{PO}_4)(\text{P}_2\text{O}_7)$                              | -    | 0.25 | 1.60 |
| 68505 | $(\text{NH}_4)_4\text{OBr}_2$                                                                      | 0.30 | 0.30 | 0.38 |
| 68533 | $(\text{NH}_4)\text{Mo}_4\text{O}_6$                                                               | -    | -    | 0.12 |
| 68603 | $(\text{NH}_4)_6(\text{CoS}_4)$                                                                    | 0.31 | 0.31 | 0.30 |
| 68705 | $\text{NH}_4(\text{TiO})(\text{PO}_4)$                                                             | 0.66 | 0.66 | 0.23 |
| 68706 | $\text{NH}_4\text{SnO}(\text{PO}_4)$                                                               | 0.78 | 0.78 | 0.22 |
| 68989 | $\text{NH}_4(\text{GaO}_2)$                                                                        | 0.28 | 0.40 | 0.32 |
| 69019 | $\text{NH}_4\text{GaO}_2$                                                                          | 0.46 | 0.27 | 0.28 |
| 69429 | $\text{NH}_4(\text{SbO})(\text{SiO}_4)$                                                            | 0.72 | 0.72 | 0.17 |
| 69556 | $\text{NH}_4\text{VO}(\text{PO}_4)$                                                                | 0.67 | 0.25 | 0.67 |
| 71536 | $(\text{NH}_4)_2\text{Co}(\text{SeO}_3)_2$                                                         | 0.10 | 0.10 | -    |
| 71540 | $(\text{NH}_4)_2\text{Mn}(\text{SeO}_3)_2$                                                         | 0.09 | 0.09 | -    |
| 71803 | $(\text{NH}_4)_3\text{Nd}(\text{Si}_6\text{O}_{15})$                                               | 0.38 | 0.39 | 0.19 |
| 71904 | $\text{NH}_4(\text{TiO})((\text{P}_{0.58}\text{As}_{0.42})\text{O}_4)$                             | 0.58 | 0.58 | 0.22 |
| 71927 | $(\text{NH}_4)_6\text{Cr}_{0.38}\text{Nb}_{15.62}\text{O}_{42}$                                    | 0.26 | 0.26 | -    |
| 72051 | $\text{NH}_4(\text{TiO})((\text{P}_{0.5}\text{As}_{0.5})\text{O}_4)$                               | 0.59 | 0.21 | 0.59 |
| 72514 | $(\text{NH}_4)_3(\text{Nb}_8\text{O}_{21})$                                                        | 0.27 | 0.27 | -    |
| 72720 | $\text{NH}_4(\text{Ti}_{.496}\text{Sn}_{.504})\text{O}(\text{PO}_4)$                               | 0.65 | 0.24 | 0.65 |
| 72736 | $\text{NH}_4(\text{ScF}_4)$                                                                        | -    | 0.24 | -    |
| 72873 | $(\text{NH}_4)_3(\text{NbP}_2\text{O}_9)$                                                          | 0.23 | 0.93 | 0.93 |
| 72976 | $(\text{NH}_4)_2\text{Bi}_8\text{Se}_{13}$                                                         | -    | -    | 0.27 |
| 73136 | $\text{Rb}_4(\text{NH}_4)_2(\text{Fe}_2\text{O}_5)$                                                | 0.27 | 0.57 | 0.73 |
| 73205 | $(\text{NH}_4)_5\text{Li}(\text{Ge}_2\text{O}_7)$                                                  | 0.26 | 0.53 | 0.26 |
| 73212 | $(\text{NH}_4)_3\text{CoO}_2$                                                                      | 0.21 | 0.17 | 0.21 |
| 73260 | $(\text{NH}_4)_6\text{CrNb}_{15}\text{O}_{42}$                                                     | 0.27 | 0.27 | -    |
| 73550 | $(\text{NH}_4)_6(\text{Ge}_2\text{O}_7)$                                                           | 0.18 | 0.31 | 0.30 |
| 73807 | $\text{NH}_4\text{Mo}_4\text{O}_6$                                                                 | -    | -    | 0.12 |
| 74193 | $(\text{NH}_4)_2\text{La}_2(\text{Ti}_3\text{O}_{10})$                                             | 0.20 | 0.20 | -    |
| 74300 | $(\text{Rb}_{0.88}(\text{NH}_4)_{0.12})_2((\text{NH}_4)_{0.91}\text{Rb}_{0.09})_2(\text{GeO}_3)_2$ | -    | 0.29 | 1.69 |
| 74591 | $\text{NH}_4(\text{TiO})(\text{AsO}_4)$                                                            | 0.51 | 0.51 | 0.19 |
| 74592 | $\text{NH}_4(\text{TiO})(\text{AsO}_4)$                                                            | 0.48 | 0.48 | 0.16 |
| 74593 | $\text{NH}_4(\text{TiO})(\text{AsO}_4)$                                                            | 0.48 | 0.48 | 0.15 |
| 74594 | $\text{NH}_4(\text{TiO})(\text{AsO}_4)$                                                            | 0.47 | 0.47 | 0.16 |
| 74873 | $(\text{NH}_4)_6(\text{Pb}_2\text{O}_5)$                                                           | 0.48 | 0.50 | 0.27 |
| 74874 | $(\text{NH}_4)_4(\text{PbO}_3)$                                                                    | -    | 0.06 | 0.46 |

|       |                                                                                   |      |      |      |
|-------|-----------------------------------------------------------------------------------|------|------|------|
| 74911 | $(\text{NH}_4)_5(\text{InO}_4)$                                                   | -    | 0.28 | 0.27 |
| 74940 | $(\text{NH}_4)_2(\text{CoO}_2)$                                                   | 0.22 | 0.19 | 0.19 |
| 74955 | $\text{Cs}(\text{NH}_4)_4(\text{TiO}_4)$                                          | -    | 0.09 | -    |
| 74956 | $(\text{NH}_4)_4\text{Na}_2(\text{Ti}_2\text{O}_6)$                               | 0.28 | 0.07 | 0.97 |
| 74968 | $(\text{NH}_4)_6(\text{Al}_2\text{O}_6)$                                          | 0.11 | 0.21 | 0.27 |
| 75322 | $\text{NH}_4(\text{TiO})(\text{AsO}_4)$                                           | 0.51 | 0.51 | 0.18 |
| 76891 | $(\text{NH}_4)_2\text{Pb}(\text{SO}_4)_2$                                         | 0.09 | 0.09 | -    |
| 76935 | $(\text{NH}_4)_3\text{Na}(\text{UO}_2)(\text{CO}_3)_3$                            | 2.76 | 2.76 | 0.04 |
| 77333 | $\text{NH}_4(\text{SbO}_3)$                                                       | 0.16 | 0.16 | 0.16 |
| 78891 | $(\text{NH}_4)_3\text{OCl}$                                                       | 0.13 | 0.13 | 0.13 |
| 79101 | $(\text{NH}_4)_4(\text{SnO}_3)$                                                   | -    | 0.06 | 0.41 |
| 79200 | $\text{NH}_4(\text{Bi}_3\text{S}_5)$                                              | -    | 0.29 | -    |
| 79535 | $(\text{NH}_4)_{0.95}\text{Mo}_4\text{O}_6$                                       | -    | -    | 0.12 |
| 79650 | $\text{NH}_4(\text{SnO})(\text{PO}_4)$                                            | 0.67 | 0.67 | 0.22 |
| 79651 | $\text{NH}_4(\text{VO})(\text{PO}_4)$                                             | 0.65 | 0.65 | 0.24 |
| 79702 | $(\text{NH}_4)_2\text{Ni}(\text{WO}_2(\text{PO}_4)_2)$                            | 0.44 | 0.44 | 0.19 |
| 79711 | $\text{NH}_4(\text{AlAs}_2\text{O}_7)$                                            | 1.63 | -    | 0.23 |
| 80022 | $\text{NH}_4(\text{TiO})((\text{P}_{0.75}\text{As}_{0.25})\text{O}_4)$            | 0.61 | 0.61 | 0.22 |
| 80023 | $\text{NH}_4(\text{TiO})((\text{P}_{0.56}\text{As}_{0.44})\text{O}_4)$            | 0.58 | 0.58 | 0.22 |
| 80024 | $\text{NH}_4(\text{TiO})((\text{P}_{0.38}\text{As}_{0.62})\text{O}_4)$            | 0.55 | 0.55 | 0.20 |
| 80336 | $(\text{NH}_4)_{0.25}\text{IrO}_2$                                                | -    | 0.02 | -    |
| 80893 | $\text{NH}_4\text{GaF}(\text{PO}_4)$                                              | 1.17 | 1.17 | 0.30 |
| 80976 | $\text{NH}_4(\text{SnO})(\text{AsO}_4)$                                           | 0.52 | 0.52 | 0.18 |
| 81478 | $\text{Cs}_2(\text{NH}_4)_2\text{B}_{10}\text{O}_{17}$                            | -    | 0.27 | 1.18 |
| 81479 | $(\text{NH}_4)_6(\text{VO})_4(\text{SO}_4)_8$                                     | 0.62 | 3.01 | 0.07 |
| 81541 | $(\text{NH}_4)_{0.99}(\text{Mo}_4\text{O}_{0.31})\text{O}_6$                      | -    | -    | 0.12 |
| 81864 | $(\text{NH}_4)_2(\text{AlF}_5)$                                                   | 0.20 | 0.20 | 0.37 |
| 82276 | $(\text{NH}_4)_2\text{Cr}_8\text{O}_{16}$                                         | -    | -    | 0.04 |
| 82391 | $\text{NH}_4(\text{GaAs}_2\text{O}_7)$                                            | 2.02 | -    | 0.22 |
| 82398 | $(\text{NH}_4)_2(\text{Be}_2\text{Si}_3\text{O}_9)$                               | 0.77 | 0.28 | 0.77 |
| 82457 | $\text{NH}_4\text{Li}(\text{Si}_2\text{O}_5)$                                     | 3.17 | 0.28 | -    |
| 82601 | $(\text{NH}_4)_{0.998}((\text{Ti}_{0.998}\text{W}_{0.002})\text{O})(\text{PO}_4)$ | 0.67 | 0.24 | 0.67 |
| 82905 | $(\text{NH}_4)_2\text{La}_2(\text{Ti}_3\text{O}_{10})$                            | 0.20 | 0.20 | -    |
| 83285 | $(\text{NH}_4)(\text{Fe}_{11}\text{O}_{17})$                                      | 0.12 | 0.12 | -    |
| 83431 | $(\text{NH}_4)_2\text{Ca}_2(\text{CO}_3)_3$                                       | 0.47 | 0.47 | 0.29 |
| 83843 | $(\text{NH}_4)_2(\text{Te}_4\text{O}_9)$                                          | -    | 0.58 | 0.29 |
| 83844 | $(\text{NH}_4)_2(\text{Te}_2\text{O}_5)$                                          | 0.21 | 0.90 | 3.22 |
| 85404 | $(\text{NH}_4)_6(\text{CuSi}_2\text{O}_8)$                                        | 0.18 | 0.23 | 0.43 |
| 85505 | $(\text{NH}_4)_2\text{Ca}(\text{NO}_2)_4$                                         | 0.12 | 0.12 | -    |
| 85583 | $(\text{NH}_4)_2\text{Au}_4\text{CdS}_4$                                          | 0.81 | 0.27 | 1.66 |

|        |                                                                                               |      |      |      |
|--------|-----------------------------------------------------------------------------------------------|------|------|------|
| 85750  | $(\text{NH}_4)_3\text{Al}_5(\text{HPO}_4)_6(\text{PO}_4)_2(\text{H}_2\text{O})_{18}$          | 0.12 | 0.12 | -    |
| 85751  | $(\text{NH}_4)_3\text{Al}_5(\text{DPO}_4)_6(\text{PO}_4)_2(\text{D}_2\text{O})_{18}$          | 0.15 | 0.15 | -    |
| 86784  | $\text{NH}_4\text{Fe}_{0.43}\text{Nb}_{1.57}\text{O}_5$                                       | 0.08 | 0.42 | -    |
| 88595  | $(\text{NH}_4)_2\text{Mg}(\text{Sn}_7\text{O}_{16})$                                          | -    | 0.04 | -    |
| 88774  | $\text{NH}_4\text{AlO}_2$                                                                     | 0.24 | 0.43 | 0.25 |
| 88843  | $(\text{NH}_4)_2\text{Zr}(\text{Ge}_2\text{O}_7)$                                             | 0.93 | 0.25 | -    |
| 90736  | $\text{LaNH}_4\text{O}(\text{CO}_3)$                                                          | 0.29 | 0.29 | -    |
| 91313  | $(\text{NH}_4)_6(\text{UO}_2)_5(\text{VO}_4)_2\text{O}_5$                                     | -    | 0.61 | 0.23 |
| 91534  | $\text{NH}_4(\text{Ti}_{0.936}\text{Sn}_{0.064})\text{O}(\text{PO}_4)$                        | 0.67 | 0.67 | 0.24 |
| 91556  | $(\text{NH}_4)_{0.96}\text{Ti}_{0.96}\text{Nb}_{0.04}\text{O}(\text{PO}_4)$                   | 0.67 | 0.67 | 0.23 |
| 91578  | $(\text{NH}_4)_{0.8}\text{Ti}_{1.733}\text{Li}_{0.267}\text{O}_4(\text{H}_2\text{O})_{0.112}$ | 0.68 | -    | 0.16 |
| 93492  | $(\text{NH}_4)_2\text{Sr}(\text{Ta}_2\text{O}_7)$                                             | 0.19 | 0.19 | -    |
| 94465  | $(\text{NH}_4)_3(\text{Fe}_2\text{O}_4)$                                                      | 0.19 | 0.25 | 0.25 |
| 94466  | $(\text{NH}_4)_3(\text{Fe}_2\text{O}_4)$                                                      | 0.19 | 0.25 | 0.25 |
| 94467  | $(\text{NH}_4)_2(\text{Fe}_2\text{O}_4)$                                                      | 0.28 | 0.48 | 0.28 |
| 95260  | $(\text{NH}_4)_2\text{Sr}_{1.5}\text{Ta}_3\text{O}_{10}$                                      | 0.17 | 0.17 | -    |
| 95792  | $(\text{NH}_4)_2\text{La}_{0.667}(\text{Ta}_2\text{O}_7)$                                     | 0.20 | 0.20 | -    |
| 95959  | $(\text{NH}_4)_2(\text{ZnP}_2\text{O}_7)$                                                     | 0.23 | 0.23 | -    |
| 96441  | $(\text{NH}_4)_2(\text{UO}_2)_2(\text{WO}_5)\text{O}$                                         | 0.17 | 0.17 | 0.17 |
| 96443  | $(\text{NH}_4)_2(\text{UO}_2)(\text{W}_2\text{O}_8)$                                          | 0.30 | 1.08 | -    |
| 96739  | $(\text{NH}_4)_2\text{Te}$                                                                    | 0.15 | 0.15 | 0.15 |
| 97570  | $(\text{NH}_4)_2((\text{NH}_4)_{0.5}\text{Yb}_{0.5})(\text{MoO}_4)_2$                         | 0.17 | 0.17 | -    |
| 98708  | $\text{Na}_{0.667}(\text{NH}_4)_{1.333}(\text{Si}_2\text{O}_5)$                               | 0.30 | 0.19 | 0.30 |
| 100224 | $\text{Cu}_{1.82}(\text{NH}_4)_{0.2}(\text{Al}_{3.9}\text{Si}_{8.1}\text{O}_{24})$            | 0.28 | 0.28 | 0.28 |
| 100596 | $(\text{NH}_4)_2\text{V}_8\text{O}_{16}$                                                      | -    | -    | 0.01 |
| 108934 | $(\text{NH}_4)_3(\text{CrO}_4)$                                                               | 0.29 | 0.29 | 0.29 |
| 150255 | $(\text{NH}_4)_2\text{Cd}(\text{C}_2\text{O}_4)_2(\text{H}_2\text{O})_2$                      | 0.23 | 0.23 | 0.23 |
| 150292 | $(\text{NH}_4)_2\text{CuCl}_3$                                                                | 2.49 | 0.30 | 2.75 |
| 150840 | $(\text{NH}_4)_2(\text{WO}_4)$                                                                | 0.86 | 0.22 | 0.36 |
| 150841 | $(\text{NH}_4)_2((\text{Mo}_{0.5}\text{W}_{0.5})\text{O}_4)$                                  | 0.95 | 0.24 | 0.36 |
| 150842 | $(\text{NH}_4)_2(\text{MoO}_4)$                                                               | 0.90 | 0.21 | 0.26 |
| 151882 | $\text{NH}_4(\text{AlO}_2)$                                                                   | 0.22 | 0.44 | 0.24 |
| 151883 | $\text{NH}_4(\text{AlO}_2)$                                                                   | 0.14 | 0.14 | 0.14 |
| 152439 | $(\text{NH}_4)_4\text{Co}_7\text{O}_{14}$                                                     | 0.09 | 0.09 | -    |
| 153320 | $(\text{NH}_4)_2(\text{MgSn}_7\text{O}_{16})$                                                 | -    | -    | 0.07 |
| 153322 | $(\text{NH}_4)_2(\text{Fe}_2\text{Sn}_6\text{O}_{16})$                                        | -    | -    | 0.07 |

|        |                                                                                                                       |      |      |      |
|--------|-----------------------------------------------------------------------------------------------------------------------|------|------|------|
| 153323 | $(\text{NH}_4)_2(\text{Mn}_2\text{Sn}_6\text{O}_{16})$                                                                | -    | -    | 0.07 |
| 153459 | $\text{NH}_4(\text{SbMoO}_5)$                                                                                         | 2.06 | 1.30 | 0.26 |
| 154164 | $(\text{NH}_4)_2(\text{V}_8\text{O}_{21})$                                                                            | -    | 0.10 | -    |
| 154372 | $(\text{NH}_4)_4(\text{Fe}_2\text{O}_5)$                                                                              | 0.62 | 0.12 | 0.14 |
| 155495 | $\text{NH}_4(\text{Os}_2\text{O}_6)$                                                                                  | 0.09 | 0.09 | 0.09 |
| 155528 | $\text{NH}_4(\text{TiO})(\text{PO}_4)$                                                                                | 0.65 | 0.65 | 0.23 |
| 155564 | $(\text{NH}_4)_{1.88}\text{Ga}_{1.88}\text{Sn}_{6.12}\text{O}_{16}$                                                   | -    | -    | 0.07 |
| 155716 | $\text{NH}_4\text{Mn}(\text{HP}_3\text{O}_{10})$                                                                      | -    | -    | 0.06 |
| 157785 | $\text{NH}_4(\text{FeO}_2)$                                                                                           | 0.28 | 0.46 | 0.28 |
| 157839 | $\text{NH}_4\text{Ca}_2(\text{Nb}_3\text{O}_{10})$                                                                    | 0.11 | 0.90 | -    |
| 158349 | $(\text{NH}_4)_{0.9}\text{Na}_{0.1}\text{Na}_{0.1}(\text{Mg}_{4.17}\text{Fe}_{0.83})(\text{Si}_{12}\text{O}_{30})$    | 1.58 | 1.57 | 0.27 |
| 158352 | $(\text{NH}_4)_{0.85}\text{Na}_{0.15}\text{Na}_{0.14}(\text{Mg}_{4.18}\text{Fe}_{0.82})(\text{Si}_{12}\text{O}_{30})$ | 1.44 | 1.44 | 0.27 |
| 160190 | $\text{NH}_4\text{Y}(\text{P}_2\text{O}_7)$                                                                           | 2.96 | 1.80 | 0.24 |
| 160191 | $\text{NH}_4\text{Lu}(\text{P}_2\text{O}_7)$                                                                          | 2.51 | 2.00 | 0.24 |
| 160698 | $\text{NH}_4(\text{Os}_2\text{O}_6)$                                                                                  | 0.07 | 0.07 | 0.07 |
| 161904 | $\text{NH}_4\text{Mn}(\text{HP}_3\text{O}_{10})$                                                                      | -    | -    | 0.06 |
| 170786 | $(\text{NH}_4)_{1.33}\text{Na}_{0.67}\text{Si}_2\text{O}_5$                                                           | 0.34 | 0.21 | 0.66 |
| 170832 | $(\text{NH}_4)_2\text{NbAlO}_2((\text{As}_{0.8}\text{Nb}_{0.2})\text{O}_4)_2$                                         | 0.45 | 0.14 | 0.45 |
| 170948 | $(\text{NH}_4)_6(\text{Cd}_4\text{Sn}_3\text{Se}_{13})$                                                               | -    | 0.26 | 0.26 |
| 171267 | $(\text{NH}_4)_2(\text{B}(\text{AsO}_4)_2\text{H})$                                                                   | 0.26 | 0.26 | 0.16 |
| 172528 | $(\text{NH}_4)_3\text{Gd}_5(\text{PO}_4)_6$                                                                           | -    | -    | 0.29 |
| 172618 | $\text{NH}_4\text{Os}_2\text{O}_6$                                                                                    | 0.06 | 0.06 | 0.06 |
| 172619 | $\text{NH}_4\text{Os}_2\text{O}_6$                                                                                    | 0.06 | 0.06 | 0.06 |
| 172620 | $\text{NH}_4\text{Os}_2\text{O}_6$                                                                                    | 0.07 | 0.07 | 0.07 |
| 173150 | $(\text{NH}_4)_2\text{Ce}(\text{PO}_4)_2$                                                                             | 0.04 | 0.04 | 0.11 |
| 173233 | $\text{NH}_4(\text{Ti}_{0.96}\text{Zr}_{0.04})\text{OPO}_4$                                                           | 0.66 | 0.66 | 0.23 |
| 173234 | $\text{NH}_4(\text{Ti}_{0.97}\text{Zr}_{0.03})\text{OPO}_4$                                                           | 0.65 | 0.65 | 0.23 |
| 173235 | $\text{NH}_4(\text{Ti}_{0.97}\text{Zr}_{0.03})\text{OPO}_4$                                                           | 0.65 | 0.65 | 0.24 |
| 200086 | $(\text{NH}_4)_3\text{AgO}_2$                                                                                         | -    | 0.16 | 0.17 |
| 200100 | $(\text{NH}_4)_{0.5}(\text{H}_2\text{O})_{0.4}\text{NbS}_2$                                                           | 0.02 | 0.02 | -    |
| 200101 | $(\text{NH}_4)_{0.33}(\text{H}_2\text{O})_{0.6}\text{TaS}_2$                                                          | 0.02 | 0.02 | -    |
| 200161 | $(\text{NH}_4)_3\text{NdSi}_6\text{O}_{15}$                                                                           | 0.36 | 0.37 | 0.18 |
| 200254 | $\text{NH}_4\text{FeO}_2$                                                                                             | 0.28 | 0.47 | 0.28 |
| 200255 | $\text{NH}_4\text{FeO}_2$                                                                                             | 0.25 | 0.49 | 0.27 |
| 200310 | $(\text{NH}_4)_2\text{Ni}(\text{MoO}_4)_2$                                                                            | 0.27 | -    | 0.47 |
| 200388 | $(\text{NH}_4)_8\text{Zr}(\text{MoO}_4)_6$                                                                            | 0.56 | 0.26 | 0.55 |
| 200389 | $(\text{NH}_4)_8\text{Hf}(\text{MoO}_4)_6$                                                                            | 0.55 | 0.25 | 0.56 |
| 200613 | $\text{NH}_4\text{Fe}(\text{PO}_4)\text{F}$                                                                           | 0.28 | 1.03 | 1.03 |
| 200777 | $(\text{NH}_4)_2\text{Ni}_4(\text{PO}_4)_2(\text{P}_2\text{O}_7)$                                                     | -    | 2.15 | 0.14 |
| 201060 | $(\text{NH}_4)_{2.38}\text{Sb}_{3.62}\text{Ti}_{0.38}\text{O}_{11}$                                                   | -    | 0.26 | 0.26 |
| 201788 | $(\text{NH}_4)_2(\text{SbPO}_6)$                                                                                      | 0.32 | 0.29 | 1.01 |

|        |                                                                        |      |      |      |
|--------|------------------------------------------------------------------------|------|------|------|
| 201891 | $(\text{NH}_4)_2\text{NiO}_2$                                          | 0.16 | 0.16 | -    |
| 202071 | $(\text{NH}_4)_3\text{Li}_3\text{TeO}_6$                               | -    | 0.13 | 0.39 |
| 202073 | $(\text{NH}_4)_4\text{Na}_2(\text{TeO}_6)$                             | 0.21 | 0.24 | 0.93 |
| 202158 | $\text{NH}_4(\text{TiO})(\text{AsO}_4)$                                | 0.51 | 0.18 | 0.51 |
| 202178 | $\text{NH}_4\text{AuS}$                                                | 1.24 | 1.24 | 0.24 |
| 202428 | $(\text{NH}_4)_3\text{Bi}_2(\text{VO}_4)_3$                            | -    | 0.50 | 0.23 |
| 202520 | $\text{NH}_4\text{LiZn}_3\text{O}_4$                                   | -    | -    | 0.18 |
| 202560 | $(\text{NH}_4)_4\text{Li}(\text{IO}_6)$                                | -    | 0.27 | 0.78 |
| 202980 | $(\text{NH}_4)_3(\text{NbAs}_2\text{O}_9)$                             | 1.12 | 0.17 | 1.12 |
| 202997 | $\text{NH}_4\text{CuO}_2$                                              | 0.04 | -    | 0.14 |
| 203081 | $\text{NH}_4\text{CuO}_2$                                              | 0.05 | -    | 0.15 |
| 203214 | $(\text{NH}_4)_2(\text{Mn}_3(\text{OH})_2(\text{VO}_4)_2)$             | -    | 0.30 | 2.31 |
| 203218 | $\text{NH}_4(\text{MoO}_2)(\text{AsO}_4)$                              | -    | 0.28 | -    |
| 240301 | $\text{NH}_4\text{La}_2\text{Ti}_3\text{O}_{9.79}$                     | 0.13 | 0.13 | -    |
| 240717 | $\text{NH}_4\text{Yb}(\text{P}_2\text{O}_7)$                           | 2.91 | 1.88 | 0.23 |
| 240983 | $\text{In}_{0.459}(\text{NH}_4)_{0.917}\text{Nb}_{0.541}\text{OPO}_4$  | 0.40 | 0.40 | 0.17 |
| 245417 | $(\text{NH}_4)_4(\text{CO}_4)$                                         | 0.06 | 0.06 | 0.06 |
| 245420 | $(\text{NH}_4)_4(\text{CO}_4)$                                         | 0.08 | 0.08 | -    |
| 245421 | $(\text{NH}_4)_4(\text{CO}_4)$                                         | 0.05 | 0.05 | 0.06 |
| 245422 | $(\text{NH}_4)_4(\text{CO}_4)$                                         | 0.08 | 0.08 | 0.13 |
| 245423 | $(\text{NH}_4)_4(\text{CO}_4)$                                         | 0.03 | 0.03 | 0.03 |
| 245424 | $(\text{NH}_4)_4(\text{CO}_4)$                                         | 0.04 | 0.04 | 0.15 |
| 245425 | $(\text{NH}_4)_4(\text{CO}_4)$                                         | 0.29 | 0.29 | 0.20 |
| 245426 | $(\text{NH}_4)_4(\text{CO}_4)$                                         | 0.11 | 0.11 | 0.29 |
| 245428 | $(\text{NH}_4)_4(\text{CO}_4)$                                         | 0.56 | 0.56 | 0.17 |
| 246135 | $\text{NH}_4\text{Mn}_4(\text{PO}_4)_3$                                | 0.21 | -    | -    |
| 246141 | $\text{NH}_4(\text{NbW}_2\text{O}_9)$                                  | -    | -    | 0.18 |
| 246142 | $\text{NH}_4(\text{TaW}_2\text{O}_9)$                                  | -    | -    | 0.18 |
| 249162 | $(\text{NH}_4)_2(\text{Bi}(\text{PO}_4)(\text{WO}_4))$                 | -    | 0.52 | 0.16 |
| 249327 | $\text{NH}_4\text{SrNb}_2\text{O}_6\text{F}$                           | 0.06 | -    | 1.07 |
| 249730 | $((\text{NH}_4)_9\text{F}_2)(\text{Eu}_3\text{Si}_{12}\text{O}_{32})$  | 0.29 | 1.40 | 1.57 |
| 249731 | $((\text{NH}_4)_9\text{F}_2)(\text{Sm}_3\text{Si}_{12}\text{O}_{32})$  | 0.29 | 1.41 | 1.52 |
| 250087 | $\text{NH}_4((\text{Ti}_{0.47}\text{Sn}_{0.53})\text{O})(\text{PO}_4)$ | 0.66 | 0.66 | 0.24 |
| 250088 | $\text{NH}_4((\text{Ti}_{0.25}\text{Sn}_{0.75})\text{O})(\text{PO}_4)$ | 0.67 | 0.67 | 0.22 |
| 250224 | $\text{NH}_4(\text{B}_3\text{O}_5)$                                    | 1.77 | 0.29 | 1.77 |
| 250381 | $(\text{NH}_4)_2\text{Yb}(\text{PO}_4)(\text{MoO}_4)$                  | -    | 0.73 | 0.19 |
| 250394 | $(\text{Na}_{0.5}(\text{NH}_4)_{0.5})\text{Ti}_2(\text{PO}_4)_3$       | 0.21 | 0.21 | 0.21 |
| 250395 | $(\text{Rb}_{0.5}(\text{NH}_4)_{0.5})\text{Ti}_2(\text{PO}_4)_3$       | 0.28 | 0.28 | 0.29 |

|        |                                                                                           |      |      |      |
|--------|-------------------------------------------------------------------------------------------|------|------|------|
| 260054 | $(\text{NH}_4)_2\text{Ho}(\text{PO}_4)(\text{WO}_4)$                                      | 0.19 | 0.58 | -    |
| 280038 | $(\text{NH}_4)_{1.97}\text{Nb}_{1.38}\text{A}_{10.99}\text{As}_1$<br>$^{63}\text{O}_{10}$ | 0.45 | 0.14 | 0.45 |
| 280310 | $(\text{NH}_4)_2(\text{Al}_2\text{Sb}_2\text{O}_7)$                                       | 0.19 | 0.19 | -    |
| 280327 | $(\text{NH}_4)_2(\text{TiSi}_3\text{O}_9)(\text{H}_2\text{O})$                            | 0.16 | 0.50 | 0.49 |
| 280900 | $(\text{NH}_4)_2\text{Mn}_2\text{Sr}_3(\text{P}_2\text{O}_7)_3$                           | -    | 0.23 | 0.89 |
| 280905 | $(\text{NH}_4)_3\text{Fe}_5(\text{PO}_4)_6$                                               | 0.10 | -    | 0.69 |
| 300177 | $(\text{NH}_4)_5\text{GaSe}_4$                                                            | -    | 0.49 | 0.22 |
| 400850 | $(\text{NH}_4)_2(\text{TiO})_2(\text{As}_{.43}\text{P}_{.57}\text{O}_4)_2$                | 0.57 | 0.57 | 0.21 |
| 402000 | $(\text{NH}_4)_3(\text{AuSe}_2)$                                                          | -    | 0.20 | 0.14 |
| 402642 | $(\text{NH}_4)_3(\text{SbS}_4)$                                                           | 0.55 | 0.55 | 0.27 |
| 407293 | $(\text{NH}_4)_3(\text{BiO}_3)$                                                           | 0.10 | 0.10 | 0.10 |
| 407357 | $(\text{NH}_4)_3\text{Al}_5(\text{HPO}_4)_6(\text{PO}_4)_2(\text{H}_2\text{O})_{12}$      | 0.12 | 0.12 | -    |
| 408000 | $(\text{NH}_4)_4(\text{Bi}_2\text{O}_5)$                                                  | 0.15 | 0.46 | -    |
| 409484 | $\text{NH}_4(\text{Ag}(\text{CO}_3))$                                                     | -    | 0.28 | 0.28 |
| 409582 | $(\text{NH}_4)_3\text{Bi}_2(\text{PO}_4)_3$                                               | -    | 0.55 | 0.19 |
| 409792 | $\text{Co}_{0.25}(\text{NH}_4)_{0.75}\text{O}_{0.63}$                                     | 0.13 | 0.13 | -    |
| 411213 | $(\text{NH}_4)_4(\text{Sb}_2\text{O}_5)$                                                  | 0.06 | -    | 0.19 |
| 411501 | $(\text{NH}_4)_3(\text{BSb}_4\text{O}_{13})$                                              | 0.21 | 0.23 | 0.67 |
| 412135 | $(\text{NH}_4)_4(\text{GeO}_4)$                                                           | 0.24 | 0.22 | 0.17 |
| 412393 | $(\text{NH}_4)_3(\text{BiO}_4)$                                                           | 0.29 | 0.38 | 0.41 |
| 412528 | $(\text{NH}_4)_3\text{Lu}(\text{Si}_2\text{O}_7)$                                         | 0.22 | 0.22 | 2.63 |
| 412877 | $\text{BaNH}_4(\text{FeO}_3)$                                                             | 0.27 | 3.39 | 0.30 |
| 413149 | $\text{NH}_4(\text{AsO}_2)$                                                               | -    | 0.53 | 0.25 |
| 413432 | $(\text{NH}_4)_3\text{ScSi}_2\text{O}_7$                                                  | 0.21 | 0.21 | 3.35 |
| 413739 | $(\text{NH}_4)_6(\text{Cd}_4\text{Sn}_3\text{Se}_{13})$                                   | -    | 0.26 | 0.26 |
| 415753 | $(\text{NH}_4)_{17}\text{Fe}_5\text{O}_{16}$                                              | -    | 0.19 | 0.19 |
| 415754 | $(\text{NH}_4)_5\text{FeO}_4$                                                             | -    | 0.03 | 0.16 |
| 416427 | $(\text{NH}_4)_2\text{Bi}(\text{PO}_4)(\text{MoO}_4)$                                     | -    | 0.59 | 0.14 |
| 416589 | $\text{NH}_4(\text{NbUO}_6)$                                                              | -    | 0.22 | -    |
| 417102 | $\text{SmNH}_4\text{PdO}_3$                                                               | 0.63 | 0.27 | -    |
| 417103 | $\text{EuNH}_4\text{PdO}_3$                                                               | 0.62 | 0.25 | -    |
| 417104 | $\text{PrNH}_4\text{PdO}_3$                                                               | 0.61 | 0.28 | -    |
| 417105 | $\text{GdNH}_4\text{PdO}_3$                                                               | 0.63 | 0.24 | -    |
| 417106 | $\text{PrNH}_4(\text{Cu}_{0.14}\text{Pd}_{0.86})\text{O}_3$                               | 0.63 | 0.29 | -    |
| 417107 | $\text{NdNH}_4\text{PdO}_3$                                                               | 0.61 | 0.27 | -    |
| 417892 | $(\text{NH}_4)_2\text{Mn}(\text{V}_2\text{O}_7)$                                          | 0.22 | 0.22 | 2.07 |
| 418108 | $(\text{NH}_4)_2\text{PbMo}_8(\text{P}_2\text{O}_7)_8$                                    | -    | 0.28 | -    |
| 418253 | $(\text{NH}_4)_3\text{Bi}_5(\text{PO}_4)_6$                                               | -    | -    | 0.24 |
| 623958 | $\text{Co}(\text{NH}_4)_2\text{S}_2$                                                      | 0.97 | 0.97 | 0.22 |
| 623960 | $\text{Co}(\text{NH}_4)_2\text{S}_2$                                                      | 1.10 | 1.10 | 0.25 |
| 641321 | $(\text{NH}_4)_2\text{S}$                                                                 | 0.13 | 0.13 | 0.13 |

|        |                                      |      |      |      |
|--------|--------------------------------------|------|------|------|
| 641376 | $(\text{NH}_4)_2\text{Te}$           | 0.17 | 0.17 | 0.17 |
| 660294 | $\text{Hg}(\text{NH}_4)_6\text{S}_4$ | 0.29 | 0.29 | 0.23 |

---

---

**Table S2.** 166 more than four-elements compounds were screened. ID is the ICSD Collection Code, STRU is the chemical formula, C is the specific capacity(mAh/g). a, b and c are respectively the diffusion barrier values(eV) calculated by BVEL on the three axes.

| ID    | STRU                                                                                                                             | C      | a    | b    | c    |
|-------|----------------------------------------------------------------------------------------------------------------------------------|--------|------|------|------|
| 228   | (NH <sub>4</sub> ) <sub>8</sub> SiW <sub>11</sub> O <sub>39</sub> (H <sub>2</sub> O) <sub>13</sub>                               | 80.09  | 0.25 | 0.25 | 0.25 |
| 4160  | (NH <sub>4</sub> ) <sub>4</sub> SiW <sub>12</sub> O <sub>40</sub>                                                                | 37.26  | -    | 0.14 | 0.61 |
| 4188  | NH <sub>4</sub> Ga <sub>0.33</sub> W <sub>5.66</sub> O <sub>18</sub>                                                             | 19.81  | -    | -    | 0.03 |
| 4215  | (NH <sub>4</sub> ) <sub>3</sub> SbS <sub>3</sub> (Sb <sub>2</sub> O <sub>3</sub> ) <sub>3</sub>                                  | 73.46  | 3.26 | 3.26 | 0.08 |
| 10363 | NH <sub>4</sub> NiCrF <sub>6</sub>                                                                                               | 119.06 | 0.05 | 0.05 | 0.05 |
| 10492 | (NH <sub>4</sub> ) <sub>0.85</sub> Ti <sub>0.85</sub> Nb <sub>1.15</sub> O <sub>5</sub>                                          | 99.98  | 0.08 | 0.71 | -    |
| 10497 | NH <sub>4</sub> TiTaO <sub>5</sub>                                                                                               | 86.70  | 0.12 | 0.31 | -    |
| 15517 | NH <sub>4</sub> Ti <sub>3</sub> TaO <sub>9</sub>                                                                                 | 57.12  | 3.49 | 0.26 | -    |
| 15518 | (NH <sub>4</sub> ) <sub>3</sub> TiTa <sub>7</sub> O <sub>21</sub>                                                                | 48.68  | 0.26 | 0.26 | -    |
| 16557 | NH <sub>4</sub> TiNbO <sub>5</sub>                                                                                               | 121.22 | 0.09 | 0.65 | -    |
| 18022 | NH <sub>4</sub> Zn(BeF <sub>3</sub> ) <sub>3</sub>                                                                               | 101.86 | 3.06 | 3.06 | 0.30 |
| 18034 | NH <sub>4</sub> NiAlF <sub>6</sub>                                                                                               | 133.95 | 0.12 | 0.12 | 0.12 |
| 18064 | NH <sub>4</sub> Nb(WO <sub>6</sub> )                                                                                             | 71.82  | 0.07 | 0.07 | 0.07 |
| 23426 | NH <sub>4</sub> Cr <sub>.333</sub> W <sub>1.667</sub> O <sub>6</sub>                                                             | 63.78  | 0.06 | 0.06 | 0.06 |
| 27596 | NH <sub>4</sub> Na <sub>3</sub> (Al <sub>4</sub> Si <sub>4</sub> O <sub>16</sub> )                                               | 49.15  | 2.89 | 2.88 | 0.21 |
| 30247 | (NH <sub>4</sub> ) <sub>2</sub> Pb <sub>2</sub> Ge <sub>2</sub> O <sub>7</sub>                                                   | 79.73  | 0.13 | 0.13 | -    |
| 30886 | NH <sub>4</sub> Cu(PO <sub>4</sub> )                                                                                             | 168.48 | -    | 0.14 | 0.22 |
| 30910 | NaNH <sub>4</sub> GeO <sub>3</sub>                                                                                               | 186.03 | -    | 0.17 | 2.00 |
| 31021 | NH <sub>4</sub> AgCO <sub>3</sub>                                                                                                | 159.46 | -    | 0.26 | 0.26 |
| 32023 | (NH <sub>4</sub> ) <sub>5.52</sub> Ta <sub>15.76</sub> O <sub>42.00</sub>                                                        | 41.96  | 0.20 | 0.20 | 3.45 |
| 33797 | Rb <sub>2</sub> (NH <sub>4</sub> ) <sub>4</sub> ((CoO <sub>2</sub> )O(CoO <sub>2</sub> ))                                        | 291.18 | 0.28 | 0.28 | -    |
| 35463 | (NH <sub>4</sub> ) <sub>4</sub> (Mo <sub>8</sub> P <sub>12</sub> O <sub>52</sub> )                                               | 54.34  | 0.07 | 1.97 | 0.07 |
| 36380 | (NH <sub>4</sub> ) <sub>2</sub> Na(FeO <sub>3</sub> )                                                                            | 421.87 | 0.27 | 0.12 | 0.53 |
| 36612 | (NH <sub>4</sub> ) <sub>2</sub> Na <sub>4</sub> (FeO <sub>3</sub> ) <sub>2</sub>                                                 | 178.59 | 2.75 | 0.30 | 2.75 |
| 39440 | NH <sub>4</sub> CrPO <sub>4</sub> F                                                                                              | 161.38 | 1.00 | 0.29 | 1.00 |
| 39463 | NH <sub>4</sub> SbO(GeO <sub>4</sub> )                                                                                           | 97.41  | 0.56 | 0.56 | 0.13 |
| 39560 | (NH <sub>4</sub> )FeF(PO <sub>4</sub> )                                                                                          | 157.58 | 1.08 | 1.08 | 0.28 |
| 39585 | NH <sub>4</sub> TaO(GeO <sub>4</sub> )                                                                                           | 80.21  | 0.40 | 0.40 | 0.13 |
| 39697 | (NH <sub>4</sub> ) <sub>2</sub> (Zr <sub>0.86</sub> Ti <sub>0.14</sub> )(Si <sub>3</sub> O <sub>9</sub> )(H <sub>2</sub> O)<br>) | 171.19 | 0.85 | 0.85 | 0.23 |
| 39735 | NH <sub>4</sub> GeOPO <sub>4</sub>                                                                                               | 145.59 | 0.91 | 0.91 | 0.26 |
| 39882 | NH <sub>4</sub> (Ge <sub>0.063</sub> Ti <sub>0.937</sub> O)(PO <sub>4</sub> )                                                    | 166.83 | 0.68 | 0.68 | 0.23 |
| 39950 | NH <sub>4</sub> (Ge <sub>0.042</sub> Ti <sub>0.958</sub> O)(PO <sub>4</sub> )                                                    | 167.38 | 0.67 | 0.68 | 0.23 |
| 39951 | NH <sub>4</sub> (Ge <sub>0.184</sub> Ti <sub>0.816</sub> O)(PO <sub>4</sub> )                                                    | 163.75 | 0.69 | 0.69 | 0.23 |
| 47105 | NH <sub>4</sub> Na <sub>2</sub> (CuO <sub>2</sub> )                                                                              | 188.65 | 0.25 | 0.25 | -    |
| 48118 | NH <sub>4</sub> Na <sub>4</sub> (GaO <sub>4</sub> )                                                                              | 118.54 | 0.38 | 0.13 | 2.46 |
| 48119 | Cs(NH <sub>4</sub> ) <sub>4</sub> (GaO <sub>4</sub> )                                                                            | 401.33 | -    | 0.06 | -    |
| 48177 | NH <sub>4</sub> Li <sub>2</sub> (BO <sub>3</sub> )                                                                               | 366.97 | 1.72 | 0.26 | 1.72 |
| 54149 | (NH <sub>4</sub> ) <sub>0.97</sub> ((Ti <sub>0.97</sub> Nb <sub>0.03</sub> )O)(PO <sub>4</sub> )                                 | 104.88 | 0.71 | 0.71 | 0.26 |



|       |                                                                                                    |        |      |      |      |
|-------|----------------------------------------------------------------------------------------------------|--------|------|------|------|
| 59281 | $(\text{NH}_4)_2\text{MgWO}_2(\text{PO}_4)_2$                                                      | 124.60 | 0.53 | 0.49 | 0.29 |
| 59285 | $\text{NH}_4(\text{TiO})(\text{PO}_4)$                                                             | 168.48 | 0.67 | 0.67 | 0.24 |
| 59887 | $(\text{NH}_4)_3\text{Bi}_2(\text{AsO}_4)_3$                                                       | 96.25  | -    | 0.63 | 0.26 |
| 61388 | $\text{NH}_4(\text{Sb}_2\text{PO}_8)$                                                              | 70.31  | -    | 3.06 | 0.28 |
| 61403 | $\text{NH}_4\text{NaMnO}_2$                                                                        | 243.54 | 0.38 | 0.38 | 0.27 |
| 62064 | $\text{Cs}(\text{NH}_4)_2\text{AuO}_2$                                                             | 148.01 | 0.63 | 0.21 | 0.32 |
| 62102 | $(\text{NH}_4)_9\text{Li}_3(\text{IO}_6)_2\text{O}$                                                | 623.00 | 0.50 | 0.50 | 0.10 |
| 62130 | $(\text{NH}_4)_2\text{Nb}_{10}\text{W}_7\text{O}_{47}$                                             | 18.04  | -    | 0.14 | -    |
| 62136 | $(\text{NH}_4)_2\text{Na}_4(\text{GaO}_3)_2$                                                       | 163.35 | 2.84 | 0.29 | 2.84 |
| 62166 | $(\text{NH}_4)_3(\text{Sb}_3\text{P}_2\text{O}_{14})$                                              | 123.26 | 0.04 | 0.04 | -    |
| 62287 | $\text{NH}_4\text{Mn}_4(\text{PO}_4)_3$                                                            | 53.05  | -    | -    | 0.21 |
| 62650 | $\text{Na}_4(\text{NH}_4)_2(\text{Ge}_2\text{O}_7)$                                                | 153.08 | 0.22 | 0.26 | 3.08 |
| 63544 | $\text{NH}_4\text{Ni}(\text{AsO}_4)$                                                               | 135.30 | 0.17 | 0.17 | -    |
| 63563 | $(\text{NH}_4)_{1.88}\text{Nb}(\text{WO}_6)$                                                       | 135.02 | 0.01 | 0.01 | 0.01 |
| 65260 | $\text{NH}_4\text{Li}_4(\text{AlO}_4)$                                                             | 273.36 | 0.15 | -    | -    |
| 65291 | $(\text{NH}_4)_3(\text{LiSiO}_4)$                                                                  | 811.79 | -    | 0.27 | 0.34 |
| 65420 | $\text{NH}_4(\text{Mo}_2\text{P}_3\text{O}_{13})$                                                  | 54.34  | 2.05 | 0.06 | 0.06 |
| 65656 | $\text{NH}_4\text{Mo}(\text{P}_2\text{O}_7)$                                                       | 99.22  | 2.77 | 2.13 | 0.28 |
| 65682 | $\text{NH}_4\text{MoW}(\text{P}_3\text{O}_{12})$                                                   | 47.41  | -    | 0.25 | 1.68 |
| 65942 | $\text{Cs}_2(\text{NH}_4)_4(\text{Fe}_2\text{O}_5)$                                                | 329.71 | 0.24 | -    | 0.29 |
| 65976 | $(\text{NH}_4)_{11}(\text{Li}(\text{MnO}_4)_4)$                                                    | 610.10 | 0.30 | 0.30 | 0.47 |
| 65978 | $(\text{NH}_4)_3\text{Na}_2(\text{LiTeO}_6)$                                                       | 290.13 | 0.21 | -    | 0.11 |
| 67120 | $(\text{NH}_4)_{.84}(\text{Nb}_{.08}\text{Ti}_{.92})\text{OPO}_4$                                  | 138.39 | 0.66 | 0.66 | 0.22 |
| 68496 | $(\text{NH}_4)_{0.75}\text{MoNbO}(\text{PO}_4)(\text{P}_2\text{O}_7)$                              | 42.39  | -    | 0.25 | 1.60 |
| 68706 | $\text{NH}_4\text{SnO}(\text{PO}_4)$                                                               | 116.47 | 0.78 | 0.78 | 0.22 |
| 69429 | $\text{NH}_4(\text{SbO})(\text{SiO}_4)$                                                            | 116.47 | 0.72 | 0.72 | 0.17 |
| 69556 | $\text{NH}_4\text{VO}(\text{PO}_4)$                                                                | 165.36 | 0.67 | 0.25 | 0.67 |
| 71536 | $(\text{NH}_4)_2\text{Co}(\text{SeO}_3)_2$                                                         | 171.18 | 0.10 | 0.10 | -    |
| 71540 | $(\text{NH}_4)_2\text{Mn}(\text{SeO}_3)_2$                                                         | 173.39 | 0.09 | 0.09 | -    |
| 71904 | $\text{NH}_4(\text{TiO})((\text{P}_{0.58}\text{As}_{0.42})\text{O}_4)$                             | 150.94 | 0.58 | 0.58 | 0.22 |
| 71927 | $(\text{NH}_4)_6\text{Cr}_{0.38}\text{Nb}_{15.62}\text{O}_{42}$                                    | 74.95  | 0.26 | 0.26 | -    |
| 72051 | $\text{NH}_4(\text{TiO})((\text{P}_{0.5}\text{As}_{0.5})\text{O}_4)$                               | 148.01 | 0.59 | 0.21 | 0.59 |
| 72720 | $\text{NH}_4(\text{Ti}_{1.496}\text{Sn}_{.504})\text{O}(\text{PO}_4)$                              | 137.53 | 0.65 | 0.24 | 0.65 |
| 72873 | $(\text{NH}_4)_3(\text{NbP}_2\text{O}_9)$                                                          | 268.79 | 0.23 | 0.93 | 0.93 |
| 73136 | $\text{Rb}_4(\text{NH}_4)_2(\text{Fe}_2\text{O}_5)$                                                | 100.71 | 0.27 | 0.57 | 0.73 |
| 73205 | $(\text{NH}_4)_5\text{Li}(\text{Ge}_2\text{O}_7)$                                                  | 505.45 | 0.26 | 0.53 | 0.26 |
| 73260 | $(\text{NH}_4)_6\text{CrNb}_{15}\text{O}_{42}$                                                     | 75.85  | 0.27 | 0.27 | -    |
| 74300 | $(\text{Rb}_{0.88}(\text{NH}_4)_{0.12})_2((\text{NH}_4)_{0.91}\text{Rb}_{0.09})_2(\text{GeO}_3)_2$ | 135.62 | -    | 0.29 | 1.69 |
| 74591 | $\text{NH}_4(\text{TiO})(\text{AsO}_4)$                                                            | 131.97 | 0.51 | 0.51 | 0.19 |
| 74955 | $\text{Cs}(\text{NH}_4)_4(\text{TlO}_4)$                                                           | 267.22 | -    | 0.09 | -    |
| 74956 | $(\text{NH}_4)_4\text{Na}_2(\text{Tl}_2\text{O}_6)$                                                | 194.83 | 0.28 | 0.07 | 0.97 |
| 76891 | $(\text{NH}_4)_2\text{Pb}(\text{SO}_4)_2$                                                          | 134.28 | 0.09 | 0.09 | -    |
| 79650 | $\text{NH}_4(\text{SnO})(\text{PO}_4)$                                                             | 116.47 | 0.67 | 0.67 | 0.22 |

|        |                                                                                                                      |        |      |      |      |
|--------|----------------------------------------------------------------------------------------------------------------------|--------|------|------|------|
| 79651  | $\text{NH}_4(\text{VO})(\text{PO}_4)$                                                                                | 165.36 | 0.65 | 0.65 | 0.24 |
| 79702  | $(\text{NH}_4)_2\text{Ni}(\text{WO}_2(\text{PO}_4)_2)$                                                               | 123.45 | 0.44 | 0.44 | 0.19 |
| 79711  | $\text{NH}_4(\text{AlAs}_2\text{O}_7)$                                                                               | 92.70  | 1.63 | -    | 0.23 |
| 80022  | $\text{NH}_4(\text{TiO})(\text{P}_{0.75}\text{As}_{0.25}\text{O}_4)$                                                 | 157.58 | 0.61 | 0.61 | 0.22 |
| 80023  | $\text{NH}_4(\text{TiO})(\text{P}_{0.56}\text{As}_{0.44}\text{O}_4)$                                                 | 150.20 | 0.58 | 0.58 | 0.22 |
| 80024  | $\text{NH}_4(\text{TiO})(\text{P}_{0.38}\text{As}_{0.62}\text{O}_4)$                                                 | 143.81 | 0.55 | 0.55 | 0.20 |
| 80893  | $\text{NH}_4\text{GaF}(\text{PO}_4)$                                                                                 | 145.59 | 1.17 | 1.17 | 0.30 |
| 80976  | $\text{NH}_4(\text{SnO})(\text{AsO}_4)$                                                                              | 97.77  | 0.52 | 0.52 | 0.18 |
| 81478  | $\text{Cs}_2(\text{NH}_4)_2\text{B}_{10}\text{O}_{17}$                                                               | 82.68  | -    | 0.27 | 1.18 |
| 81479  | $(\text{NH}_4)_6(\text{VO})_4(\text{SO}_4)_8$                                                                        | 155.15 | 0.62 | 3.01 | 0.07 |
| 82391  | $\text{NH}_4(\text{GaAs}_2\text{O}_7)$                                                                               | 80.69  | 2.02 | -    | 0.22 |
| 82398  | $(\text{NH}_4)_2(\text{Be}_2\text{Si}_3\text{O}_9)$                                                                  | 217.80 | 0.77 | 0.28 | 0.77 |
| 82457  | $\text{NH}_4\text{Li}(\text{Si}_2\text{O}_5)$                                                                        | 187.34 | 3.17 | 0.28 | -    |
| 82601  | $(\text{NH}_4)_{0.998}(\text{Ti}_{0.998}\text{W}_{0.002}\text{O})(\text{PO}_4)$                                      | 167.86 | 0.67 | 0.24 | 0.67 |
| 83431  | $(\text{NH}_4)_2\text{Ca}_2(\text{CO}_3)_3$                                                                          | 206.07 | 0.47 | 0.47 | 0.29 |
| 85404  | $(\text{NH}_4)_6(\text{CuSi}_2\text{O}_8)$                                                                           | 648.12 | 0.18 | 0.23 | 0.43 |
| 85505  | $(\text{NH}_4)_2\text{Ca}(\text{NO}_2)_4$                                                                            | 239.19 | 0.12 | 0.12 | -    |
| 85583  | $(\text{NH}_4)_2\text{Au}_4\text{CdS}_4$                                                                             | 52.12  | 0.81 | 0.27 | 1.66 |
| 85750  | $(\text{NH}_4)_3\text{Al}_5(\text{HPO}_4)_6(\text{PO}_4)_2(\text{H}_2\text{O})_{18}$                                 | 65.61  | 0.12 | 0.12 | -    |
| 86784  | $\text{NH}_4\text{Fe}_{0.43}\text{Nb}_{1.57}\text{O}_5$                                                              | 107.12 | 0.08 | 0.42 | -    |
| 88595  | $(\text{NH}_4)_2\text{Mg}(\text{Sn}_7\text{O}_{16})$                                                                 | 48.14  | -    | 0.04 | -    |
| 88843  | $(\text{NH}_4)_2\text{Zr}(\text{Ge}_2\text{O}_7)$                                                                    | 153.52 | 0.93 | 0.25 | -    |
| 91534  | $\text{NH}_4(\text{Ti}_{0.936}\text{Sn}_{0.064}\text{O})(\text{PO}_4)$                                               | 163.80 | 0.67 | 0.67 | 0.24 |
| 91556  | $(\text{NH}_4)_{0.96}\text{Ti}_{0.96}\text{Nb}_{0.04}\text{O}(\text{PO}_4)$                                          | 159.93 | 0.67 | 0.67 | 0.23 |
| 91578  | $(\text{NH}_4)_{0.8}\text{Ti}_{1.733}\text{Li}_{0.267}\text{O}_4(\text{H}_2\text{O})_{0.12}$                         | 143.78 | 0.68 | -    | 0.16 |
| 93492  | $(\text{NH}_4)_2\text{Sr}(\text{Ta}_2\text{O}_7)$                                                                    | 95.33  | 0.19 | 0.19 | -    |
| 95260  | $(\text{NH}_4)_2\text{Sr}_{1.5}\text{Ta}_3\text{O}_{10}$                                                             | 64.17  | 0.17 | 0.17 | -    |
| 95959  | $(\text{NH}_4)_2(\text{ZnP}_2\text{O}_7)$                                                                            | 224.18 | 0.23 | 0.23 | -    |
| 98708  | $\text{Na}_{0.667}(\text{NH}_4)_{1.333}(\text{Si}_2\text{O}_5)$                                                      | 235.96 | 0.30 | 0.19 | 0.30 |
| 100224 | $\text{Cu}_{1.82}(\text{NH}_4)_{0.2}(\text{Al}_{3.9}\text{Si}_{8.1}\text{O}_{24})$                                   | 6.44   | 0.28 | 0.28 | 0.28 |
| 150255 | $(\text{NH}_4)_2\text{Cd}(\text{C}_2\text{O}_4)_2(\text{H}_2\text{O})_2$                                             | 186.03 | 0.23 | 0.23 | 0.23 |
| 150841 | $(\text{NH}_4)_2((\text{Mo}_{0.5}\text{W}_{0.5})\text{O}_4)$                                                         | 262.64 | 0.95 | 0.24 | 0.36 |
| 153320 | $(\text{NH}_4)_2(\text{MgSn}_7\text{O}_{16})$                                                                        | 48.14  | -    | -    | 0.07 |
| 153322 | $(\text{NH}_4)_2(\text{Fe}_2\text{Sn}_6\text{O}_{16})$                                                               | 49.52  | -    | -    | 0.07 |
| 153323 | $(\text{NH}_4)_2(\text{Mn}_2\text{Sn}_6\text{O}_{16})$                                                               | 49.61  | -    | -    | 0.07 |
| 153459 | $\text{NH}_4(\text{SbMoO}_5)$                                                                                        | 89.90  | 2.06 | 1.30 | 0.26 |
| 155564 | $(\text{NH}_4)_{1.88}\text{Ga}_{1.88}\text{Sn}_{6.12}\text{O}_{16}$                                                  | 45.13  | -    | -    | 0.07 |
| 157839 | $\text{NH}_4\text{Ca}_2(\text{Nb}_3\text{O}_{10})$                                                                   | 51.62  | 0.11 | 0.90 | -    |
| 158349 | $((\text{NH}_4)_{0.9}\text{Na}_{0.1})\text{Na}_{0.1}(\text{Mg}_{4.17}\text{Fe}_{0.83})(\text{Si}_{12}\text{O}_{30})$ | 24.93  | 1.58 | 1.57 | 0.27 |
| 158352 | $((\text{NH}_4)_{0.85}\text{Na}_{0.15})\text{Na}_{0.14}(\text{Mg}_{4.18}\text{F}$                                    | 23.50  | 1.44 | 1.44 | 0.27 |

|        |                                                  |        |      |      |      |
|--------|--------------------------------------------------|--------|------|------|------|
|        | $e_{0.82})(Si_{12}O_{30})$                       |        |      |      |      |
| 161904 | $NH_4Mn(HP_3O_{10})$                             | 86.70  | -    | -    | 0.06 |
| 170786 | $(NH_4)_{1.33}Na_{0.67}Si_2O_5$                  | 235.32 | 0.34 | 0.21 | 0.66 |
| 170832 | $(NH_4)_2NbAlO_2((As_{0.8}Nb_{0.2})O_4)_2$       | 122.55 | 0.45 | 0.14 | 0.45 |
| 171267 | $(NH_4)_2(B(AsO_4)_2H)$                          | 184.75 | 0.26 | 0.26 | 0.16 |
| 173233 | $NH_4(Ti_{0.96}Zr_{0.04})OPO_4$                  | 166.68 | 0.66 | 0.66 | 0.23 |
| 173235 | $NH_4(Ti_{0.97}Zr_{0.03})OPO_4$                  | 167.13 | 0.65 | 0.65 | 0.24 |
| 200310 | $(NH_4)_2Ni(MoO_4)_2$                            | 141.37 | 0.27 | -    | 0.47 |
| 200388 | $(NH_4)_8Zr(MoO_4)_6$                            | 203.91 | 0.56 | 0.26 | 0.55 |
| 200389 | $(NH_4)_8Hf(MoO_4)_6$                            | 188.32 | 0.55 | 0.25 | 0.56 |
| 200613 | $NH_4Fe(PO_4)F$                                  | 157.58 | 0.28 | 1.03 | 1.03 |
| 200777 | $(NH_4)_2Ni_4(PO_4)_2(P_2O_7)$                   | 89.30  | -    | 2.15 | 0.14 |
| 201060 | $(NH_4)_{2.38}Sb_{3.62}Ti_{0.38}O_{11}$          | 100.27 | -    | 0.26 | 0.26 |
| 201788 | $(NH_4)_2(SbPO_6)$                               | 215.17 | 0.32 | 0.29 | 1.01 |
| 202071 | $(NH_4)_3Li_3TeO_6$                              | 328.03 | -    | 0.13 | 0.39 |
| 202073 | $(NH_4)_4Na_2(TeO_6)$                            | 396.87 | 0.21 | 0.24 | 0.93 |
| 202428 | $(NH_4)_3Bi_2(VO_4)_3$                           | 105.33 | -    | 0.50 | 0.23 |
| 202520 | $NH_4LiZn_3O_4$                                  | 100.71 | -    | -    | 0.18 |
| 202560 | $(NH_4)_4Li(IO_6)$                               | 465.90 | -    | 0.27 | 0.78 |
| 202980 | $(NH_4)_3(NbAs_2O_9)$                            | 207.67 | 1.12 | 0.17 | 1.12 |
| 203214 | $(NH_4)_2(Mn_3(OH)_2(VO_4)_2)$                   | 124.89 | -    | 0.30 | 2.31 |
| 203218 | $NH_4(MoO_2)(AsO_4)$                             | 100.33 | -    | 0.28 | -    |
| 246141 | $NH_4(NbW_2O_9)$                                 | 44.28  | -    | -    | 0.18 |
| 246142 | $NH_4(TaW_2O_9)$                                 | 38.66  | -    | -    | 0.18 |
| 249162 | $(NH_4)_2(Bi(PO_4)(WO_4))$                       | 97.06  | -    | 0.52 | 0.16 |
| 249327 | $NH_4SrNb_2O_6F$                                 | 68.87  | 0.06 | -    | 1.07 |
| 250087 | $NH_4((Ti_{0.47}Sn_{0.53})O)(PO_4)$              | 136.24 | 0.66 | 0.66 | 0.24 |
| 250088 | $NH_4((Ti_{0.25}Sn_{0.75})O)(PO_4)$              | 126.21 | 0.67 | 0.67 | 0.22 |
| 250394 | $(Na_{0.5}(NH_4)_{0.5})Ti_2(PO_4)_3$             | 34.13  | 0.21 | 0.21 | 0.21 |
| 250395 | $(Rb_{0.5}(NH_4)_{0.5})Ti_2(PO_4)_3$             | 31.63  | 0.28 | 0.28 | 0.29 |
| 280038 | $(NH_4)_{1.97}Nb_{1.38}Al_{0.99}As_{1.63}O_{10}$ | 120.68 | 0.45 | 0.14 | 0.45 |
| 280310 | $(NH_4)_2(Al_2Sb_2O_7)$                          | 130.68 | 0.19 | 0.19 | -    |
| 280327 | $(NH_4)_2(TiSi_3O_9)(H_2O)$                      | 194.12 | 0.16 | 0.50 | 0.49 |
| 280900 | $(NH_4)_2Mn_2Sr_3(P_2O_7)_3$                     | 59.80  | -    | 0.23 | 0.89 |
| 280905 | $(NH_4)_3Fe_5(PO_4)_6$                           | 94.55  | 0.10 | -    | 0.69 |
| 400850 | $(NH_4)_2(TiO)_2(As_{.43}P_{.57}O_4)_2$          | 150.57 | 0.57 | 0.57 | 0.21 |
| 407357 | $(NH_4)_3Al_5(HPO_4)_6(PO_4)_2(H_2O)_1$          | 89.20  | 0.12 | 0.12 | -    |
|        | 2                                                |        |      |      |      |
| 409484 | $NH_4(Ag(CO_3))$                                 | 159.46 | -    | 0.28 | 0.28 |
| 409582 | $(NH_4)_3Bi_2(PO_4)_3$                           | 114.32 | -    | 0.55 | 0.19 |
| 411501 | $(NH_4)_3(BSb_4O_{13})$                          | 113.67 | 0.21 | 0.23 | 0.67 |
| 412877 | $BaNH_4(FeO_3)$                                  | 111.16 | 0.27 | 3.39 | 0.30 |
| 413739 | $(NH_4)_6(Cd_4Sn_3Se_{13})$                      | 87.74  | -    | 0.26 | 0.26 |
| 416427 | $(NH_4)_2Bi(PO_4)(MoO_4)$                        | 115.47 | -    | 0.59 | 0.14 |

|        |                                                        |        |      |      |      |
|--------|--------------------------------------------------------|--------|------|------|------|
| 417892 | $(\text{NH}_4)_2\text{Mn}(\text{V}_2\text{O}_7)$       | 199.17 | 0.22 | 0.22 | 2.07 |
| 418108 | $(\text{NH}_4)_2\text{PbMo}_8(\text{P}_2\text{O}_7)_8$ | 22.64  | -    | 0.28 | -    |
| 418253 | $(\text{NH}_4)_3\text{Bi}_5(\text{PO}_4)_6$            | 49.76  | -    | -    | 0.24 |

---

**Table S3.** 108 compounds were obtained using a filter with a specific capacity greater than 100 mAh/g. ID is the ICSD Collection Code, STRU is the chemical formula, C is the specific capacity (mAh/g). a, b and c are respectively the diffusion barrier values (eV) calculated by BVEL on the three axes.

| ID    | STRU                                                                                                                        | C      | a    | b    | c    |
|-------|-----------------------------------------------------------------------------------------------------------------------------|--------|------|------|------|
| 10363 | NH <sub>4</sub> NiCrF <sub>6</sub>                                                                                          | 119.06 | 0.05 | 0.05 | 0.05 |
| 16557 | NH <sub>4</sub> TiNbO <sub>5</sub>                                                                                          | 121.22 | 0.09 | 0.65 | -    |
| 18022 | NH <sub>4</sub> Zn(BeF <sub>3</sub> ) <sub>3</sub>                                                                          | 101.86 | 3.06 | 3.06 | 0.30 |
| 18034 | NH <sub>4</sub> NiAlF <sub>6</sub>                                                                                          | 133.95 | 0.12 | 0.12 | 0.12 |
| 30886 | NH <sub>4</sub> Cu(PO <sub>4</sub> )                                                                                        | 168.48 | -    | 0.14 | 0.22 |
| 30910 | NaNH <sub>4</sub> GeO <sub>3</sub>                                                                                          | 186.03 | -    | 0.17 | 2.00 |
| 31021 | NH <sub>4</sub> AgCO <sub>3</sub>                                                                                           | 159.46 | -    | 0.26 | 0.26 |
| 33797 | Rb <sub>2</sub> (NH <sub>4</sub> ) <sub>4</sub> ((CoO <sub>2</sub> )O(CoO <sub>2</sub> ))                                   | 291.18 | 0.28 | 0.28 | -    |
| 36380 | (NH <sub>4</sub> ) <sub>2</sub> Na(FeO <sub>3</sub> )                                                                       | 421.87 | 0.27 | 0.12 | 0.53 |
| 36612 | (NH <sub>4</sub> ) <sub>2</sub> Na <sub>4</sub> (FeO <sub>3</sub> ) <sub>2</sub>                                            | 178.59 | 2.75 | 0.30 | 2.75 |
| 39440 | NH <sub>4</sub> CrPO <sub>4</sub> F                                                                                         | 161.38 | 1.00 | 0.29 | 1.00 |
| 39560 | NH <sub>4</sub> FeF(PO <sub>4</sub> )                                                                                       | 157.58 | 1.08 | 1.08 | 0.28 |
| 39697 | (NH <sub>4</sub> ) <sub>2</sub> (Zr <sub>0.86</sub> Ti <sub>0.14</sub> )(Si <sub>3</sub> O <sub>9</sub> )(H <sub>2</sub> O) | 171.19 | 0.85 | 0.85 | 0.23 |
| 39735 | NH <sub>4</sub> GeOPO <sub>4</sub>                                                                                          | 145.59 | 0.91 | 0.91 | 0.26 |
| 39882 | NH <sub>4</sub> (Ge <sub>0.063</sub> Ti <sub>0.937</sub> O)(PO <sub>4</sub> )                                               | 166.83 | 0.68 | 0.68 | 0.23 |
| 39950 | NH <sub>4</sub> (Ge <sub>0.042</sub> Ti <sub>0.958</sub> O)(PO <sub>4</sub> )                                               | 167.38 | 0.67 | 0.68 | 0.23 |
| 39951 | NH <sub>4</sub> (Ge <sub>0.184</sub> Ti <sub>0.816</sub> O)(PO <sub>4</sub> )                                               | 163.75 | 0.69 | 0.69 | 0.23 |
| 47105 | NH <sub>4</sub> Na <sub>2</sub> (CuO <sub>2</sub> )                                                                         | 188.65 | 0.25 | 0.25 | -    |
| 48118 | NH <sub>4</sub> Na <sub>4</sub> (GaO <sub>4</sub> )                                                                         | 118.54 | 0.38 | 0.13 | 2.46 |
| 48119 | Cs(NH <sub>4</sub> ) <sub>4</sub> (GaO <sub>4</sub> )                                                                       | 401.33 | -    | 0.06 | -    |
| 48177 | NH <sub>4</sub> Li <sub>2</sub> (BO <sub>3</sub> )                                                                          | 366.97 | 1.72 | 0.26 | 1.72 |
| 54149 | (NH <sub>4</sub> ) <sub>0.97</sub> ((Ti <sub>0.97</sub> Nb <sub>0.03</sub> )O)(PO <sub>4</sub> )                            | 104.88 | 0.71 | 0.71 | 0.26 |
| 59281 | (NH <sub>4</sub> ) <sub>2</sub> MgWO <sub>2</sub> (PO <sub>4</sub> ) <sub>2</sub>                                           | 124.60 | 0.53 | 0.49 | 0.29 |
| 59285 | NH <sub>4</sub> (TiO)(PO <sub>4</sub> )                                                                                     | 168.48 | 0.67 | 0.67 | 0.24 |
| 61403 | NH <sub>4</sub> NaMnO <sub>2</sub>                                                                                          | 243.54 | 0.38 | 0.38 | 0.27 |
| 62064 | Cs(NH <sub>4</sub> ) <sub>2</sub> AuO <sub>2</sub>                                                                          | 148.01 | 0.63 | 0.21 | 0.32 |
| 62102 | (NH <sub>4</sub> ) <sub>9</sub> Li <sub>3</sub> (IO <sub>6</sub> ) <sub>2</sub> O                                           | 623.00 | 0.50 | 0.50 | 0.10 |
| 62136 | (NH <sub>4</sub> ) <sub>2</sub> Na <sub>4</sub> (GaO <sub>3</sub> ) <sub>2</sub>                                            | 163.35 | 2.84 | 0.29 | 2.84 |
| 62166 | (NH <sub>4</sub> ) <sub>3</sub> (Sb <sub>3</sub> P <sub>2</sub> O <sub>14</sub> )                                           | 123.26 | 0.04 | 0.04 | -    |
| 62650 | Na <sub>4</sub> (NH <sub>4</sub> ) <sub>2</sub> (Ge <sub>2</sub> O <sub>7</sub> )                                           | 153.08 | 0.22 | 0.26 | 3.08 |

|       |                                                                                                    |        |      |      |      |
|-------|----------------------------------------------------------------------------------------------------|--------|------|------|------|
| 63544 | $\text{NH}_4\text{Ni}(\text{AsO}_4)$                                                               | 135.30 | 0.17 | 0.17 | -    |
| 63563 | $(\text{NH}_4)_{1.88}\text{Nb}(\text{WO}_6)$                                                       | 135.02 | 0.01 | 0.01 | 0.01 |
| 65260 | $\text{NH}_4\text{Li}_4(\text{AlO}_4)$                                                             | 273.36 | 0.15 | -    | -    |
| 65291 | $(\text{NH}_4)_3(\text{LiSiO}_4)$                                                                  | 811.79 | -    | 0.27 | 0.34 |
| 65942 | $\text{Cs}_2(\text{NH}_4)_4(\text{Fe}_2\text{O}_5)$                                                | 329.71 | 0.24 | -    | 0.29 |
| 65976 | $(\text{NH}_4)_{11}(\text{Li}(\text{MnO}_4)_4)$                                                    | 610.10 | 0.30 | 0.30 | 0.47 |
| 65978 | $(\text{NH}_4)_3\text{Na}_2(\text{LiTeO}_6)$                                                       | 290.13 | 0.21 | -    | 0.11 |
| 67120 | $(\text{NH}_4)_{.84}(\text{Nb}_{.08}\text{Ti}_{.92})\text{OPO}_4$                                  | 138.39 | 0.66 | 0.66 | 0.22 |
| 68706 | $\text{NH}_4\text{SnO}(\text{PO}_4)$                                                               | 116.47 | 0.78 | 0.78 | 0.22 |
| 69429 | $\text{NH}_4(\text{SbO})(\text{SiO}_4)$                                                            | 116.47 | 0.72 | 0.72 | 0.17 |
| 69556 | $\text{NH}_4\text{VO}(\text{PO}_4)$                                                                | 165.36 | 0.67 | 0.25 | 0.67 |
| 71536 | $(\text{NH}_4)_2\text{Co}(\text{SeO}_3)_2$                                                         | 171.18 | 0.10 | 0.10 | -    |
| 71540 | $(\text{NH}_4)_2\text{Mn}(\text{SeO}_3)_2$                                                         | 173.39 | 0.09 | 0.09 | -    |
| 71904 | $\text{NH}_4(\text{TiO})((\text{P}_{0.58}\text{As}_{0.42})\text{O}_4)$                             | 150.94 | 0.58 | 0.58 | 0.22 |
| 72051 | $\text{NH}_4(\text{TiO})((\text{P}_{0.5}\text{As}_{0.5})\text{O}_4)$                               | 148.01 | 0.59 | 0.21 | 0.59 |
| 72720 | $\text{NH}_4(\text{Ti}_{.496}\text{Sn}_{.504})\text{O}(\text{PO}_4)$                               | 137.53 | 0.65 | 0.24 | 0.65 |
| 72873 | $(\text{NH}_4)_3(\text{NbP}_2\text{O}_9)$                                                          | 268.79 | 0.23 | 0.93 | 0.93 |
| 73136 | $\text{Rb}_4(\text{NH}_4)_2(\text{Fe}_2\text{O}_5)$                                                | 100.71 | 0.27 | 0.57 | 0.73 |
| 73205 | $(\text{NH}_4)_5\text{Li}(\text{Ge}_2\text{O}_7)$                                                  | 505.45 | 0.26 | 0.53 | 0.26 |
| 74300 | $(\text{Rb}_{0.88}(\text{NH}_4)_{0.12})_2((\text{NH}_4)_{0.91}\text{Rb}_{0.09})_2(\text{GeO}_3)_2$ | 135.62 | -    | 0.29 | 1.69 |
| 74591 | $\text{NH}_4(\text{TiO})(\text{AsO}_4)$                                                            | 131.97 | 0.51 | 0.51 | 0.19 |
| 74955 | $\text{Cs}(\text{NH}_4)_4(\text{TlO}_4)$                                                           | 267.22 | -    | 0.09 | -    |
| 74956 | $(\text{NH}_4)_4\text{Na}_2(\text{Tl}_2\text{O}_6)$                                                | 194.83 | 0.28 | 0.07 | 0.97 |
| 76891 | $(\text{NH}_4)_2\text{Pb}(\text{SO}_4)_2$                                                          | 134.28 | 0.09 | 0.09 | -    |
| 79650 | $\text{NH}_4(\text{SnO})(\text{PO}_4)$                                                             | 116.47 | 0.67 | 0.67 | 0.22 |
| 79651 | $\text{NH}_4(\text{VO})(\text{PO}_4)$                                                              | 165.36 | 0.65 | 0.65 | 0.24 |
| 79702 | $(\text{NH}_4)_2\text{Ni}(\text{WO}_2(\text{PO}_4)_2)$                                             | 123.45 | 0.44 | 0.44 | 0.19 |
| 80022 | $\text{NH}_4(\text{TiO})((\text{P}_{0.75}\text{As}_{0.25})\text{O}_4)$                             | 157.58 | 0.61 | 0.61 | 0.22 |
| 80023 | $\text{NH}_4(\text{TiO})((\text{P}_{0.56}\text{As}_{0.44})\text{O}_4)$                             | 150.20 | 0.58 | 0.58 | 0.22 |
| 80024 | $\text{NH}_4(\text{TiO})((\text{P}_{0.38}\text{As}_{0.62})\text{O}_4)$                             | 143.81 | 0.55 | 0.55 | 0.20 |
| 80893 | $\text{NH}_4\text{GaF}(\text{PO}_4)$                                                               | 145.59 | 1.17 | 1.17 | 0.30 |
| 81479 | $(\text{NH}_4)_6(\text{VO})_4(\text{SO}_4)_8$                                                      | 155.15 | 0.62 | 3.01 | 0.07 |
| 82398 | $(\text{NH}_4)_2(\text{Be}_2\text{Si}_3\text{O}_9)$                                                | 217.80 | 0.77 | 0.28 | 0.77 |
| 82457 | $\text{NH}_4\text{Li}(\text{Si}_2\text{O}_5)$                                                      | 187.34 | 3.17 | 0.28 | -    |
| 82601 | $(\text{NH}_4)_{0.998}((\text{Ti}_{0.998}\text{W}_{0.002})\text{O})(\text{PO}_4)$                  | 167.86 | 0.67 | 0.24 | 0.67 |
| 83431 | $(\text{NH}_4)_2\text{Ca}_2(\text{CO}_3)_3$                                                        | 206.07 | 0.47 | 0.47 | 0.29 |
| 85404 | $(\text{NH}_4)_6(\text{CuSi}_2\text{O}_8)$                                                         | 648.12 | 0.18 | 0.23 | 0.43 |
| 85505 | $(\text{NH}_4)_2\text{Ca}(\text{NO}_2)_4$                                                          | 239.19 | 0.12 | 0.12 | -    |

|        |                                                                                               |        |      |      |      |
|--------|-----------------------------------------------------------------------------------------------|--------|------|------|------|
| 86784  | $\text{NH}_4\text{Fe}_{0.43}\text{Nb}_{1.57}\text{O}_5$                                       | 107.12 | 0.08 | 0.42 | -    |
| 88843  | $(\text{NH}_4)_2\text{Zr}(\text{Ge}_2\text{O}_7)$                                             | 153.52 | 0.93 | 0.25 | -    |
| 91534  | $\text{NH}_4(\text{Ti}_{0.936}\text{Sn}_{0.064})\text{O}(\text{PO}_4)$                        | 163.80 | 0.67 | 0.67 | 0.24 |
| 91556  | $(\text{NH}_4)_{0.96}\text{Ti}_{0.96}\text{Nb}_{0.04}\text{O}(\text{PO}_4)$                   | 159.93 | 0.67 | 0.67 | 0.23 |
| 91578  | $(\text{NH}_4)_{0.8}\text{Ti}_{1.733}\text{Li}_{0.267}\text{O}_4(\text{H}_2\text{O})_{0.112}$ | 143.78 | 0.68 | -    | 0.16 |
| 95959  | $(\text{NH}_4)_2(\text{ZnP}_2\text{O}_7)$                                                     | 224.18 | 0.23 | 0.23 | -    |
| 98708  | $\text{Na}_{0.667}(\text{NH}_4)_{1.333}(\text{Si}_2\text{O}_5)$                               | 235.96 | 0.30 | 0.19 | 0.30 |
| 150255 | $(\text{NH}_4)_2\text{Cd}(\text{C}_2\text{O}_4)_2(\text{H}_2\text{O})_2$                      | 186.03 | 0.23 | 0.23 | 0.23 |
| 150841 | $(\text{NH}_4)_2(\text{Mo}_{0.5}\text{W}_{0.5})\text{O}_4$                                    | 262.64 | 0.95 | 0.24 | 0.36 |
| 170786 | $(\text{NH}_4)_{1.33}\text{Na}_{0.67}\text{Si}_2\text{O}_5$                                   | 235.32 | 0.34 | 0.21 | 0.66 |
| 170832 | $(\text{NH}_4)_2\text{NbAlO}_2((\text{As}_{0.8}\text{Nb}_{0.2})\text{O}_4)_2$                 | 122.55 | 0.45 | 0.14 | 0.45 |
| 171267 | $(\text{NH}_4)_2(\text{B}(\text{AsO}_4)_2\text{H})$                                           | 184.75 | 0.26 | 0.26 | 0.16 |
| 173233 | $\text{NH}_4(\text{Ti}_{0.96}\text{Zr}_{0.04})\text{OPO}_4$                                   | 166.68 | 0.66 | 0.66 | 0.23 |
| 173235 | $\text{NH}_4(\text{Ti}_{0.97}\text{Zr}_{0.03})\text{OPO}_4$                                   | 167.13 | 0.65 | 0.65 | 0.24 |
| 200310 | $(\text{NH}_4)_2\text{Ni}(\text{MoO}_4)_2$                                                    | 141.37 | 0.27 | -    | 0.47 |
| 200388 | $(\text{NH}_4)_8\text{Zr}(\text{MoO}_4)_6$                                                    | 203.91 | 0.56 | 0.26 | 0.55 |
| 200389 | $(\text{NH}_4)_8\text{Hf}(\text{MoO}_4)_6$                                                    | 188.32 | 0.55 | 0.25 | 0.56 |
| 200613 | $\text{NH}_4\text{Fe}(\text{PO}_4)\text{F}$                                                   | 157.58 | 0.28 | 1.03 | 1.03 |
| 201060 | $(\text{NH}_4)_{2.38}\text{Sb}_{3.62}\text{Ti}_{10.38}\text{O}_{11}$                          | 100.27 | -    | 0.26 | 0.26 |
| 201788 | $(\text{NH}_4)_2(\text{SbPO}_6)$                                                              | 215.17 | 0.32 | 0.29 | 1.01 |
| 202071 | $(\text{NH}_4)_3\text{Li}_3\text{TeO}_6$                                                      | 328.03 | -    | 0.13 | 0.39 |
| 202073 | $(\text{NH}_4)_4\text{Na}_2(\text{TeO}_6)$                                                    | 396.87 | 0.21 | 0.24 | 0.93 |
| 202428 | $(\text{NH}_4)_3\text{Bi}_2(\text{VO}_4)_3$                                                   | 105.33 | -    | 0.50 | 0.23 |
| 202520 | $\text{NH}_4\text{LiZn}_3\text{O}_4$                                                          | 100.71 | -    | -    | 0.18 |
| 202560 | $(\text{NH}_4)_4\text{Li}(\text{IO}_6)$                                                       | 465.90 | -    | 0.27 | 0.78 |
| 202980 | $(\text{NH}_4)_3(\text{NbAs}_2\text{O}_9)$                                                    | 207.67 | 1.12 | 0.17 | 1.12 |
| 203214 | $(\text{NH}_4)_2(\text{Mn}_3(\text{OH})_2(\text{VO}_4)_2)$                                    | 124.89 | -    | 0.30 | 2.31 |
| 203218 | $\text{NH}_4(\text{MoO}_2)(\text{AsO}_4)$                                                     | 100.33 | -    | 0.28 | -    |
| 250087 | $\text{NH}_4((\text{Ti}_{0.47}\text{Sn}_{0.53})\text{O})(\text{PO}_4)$                        | 136.24 | 0.66 | 0.66 | 0.24 |
| 250088 | $\text{NH}_4((\text{Ti}_{0.25}\text{Sn}_{0.75})\text{O})(\text{PO}_4)$                        | 126.21 | 0.67 | 0.67 | 0.22 |
| 280038 | $(\text{NH}_4)_{1.97}\text{Nb}_{1.38}\text{Al}_{0.99}\text{As}_{1.63}\text{O}_{10}$           | 120.68 | 0.45 | 0.14 | 0.45 |
| 280310 | $(\text{NH}_4)_2(\text{Al}_2\text{Sb}_2\text{O}_7)$                                           | 130.68 | 0.19 | 0.19 | -    |
| 280327 | $(\text{NH}_4)_2(\text{TiSi}_3\text{O}_9)(\text{H}_2\text{O})$                                | 194.12 | 0.16 | 0.50 | 0.49 |
| 400850 | $(\text{NH}_4)_2(\text{TiO})_2(\text{As}_{.43}\text{P}_{.57}\text{O}_4)_2$                    | 150.57 | 0.57 | 0.57 | 0.21 |
| 409484 | $\text{NH}_4(\text{Ag}(\text{CO}_3))$                                                         | 159.46 | -    | 0.28 | 0.28 |

|        |                                                       |        |      |      |      |
|--------|-------------------------------------------------------|--------|------|------|------|
| 409582 | $(\text{NH}_4)_3\text{Bi}_2(\text{PO}_4)_3$           | 114.32 | -    | 0.55 | 0.19 |
| 411501 | $(\text{NH}_4)_3(\text{BSb}_4\text{O}_{13})$          | 113.67 | 0.21 | 0.23 | 0.67 |
| 412877 | $\text{BaNH}_4(\text{FeO}_3)$                         | 111.16 | 0.27 | 3.39 | 0.30 |
| 416427 | $(\text{NH}_4)_2\text{Bi}(\text{PO}_4)(\text{MoO}_4)$ | 115.47 | -    | 0.59 | 0.14 |
| 417892 | $(\text{NH}_4)_2\text{Mn}(\text{V}_2\text{O}_7)$      | 199.17 | 0.22 | 0.22 | 2.07 |

---



**Table S4.** The final 72 compounds (Original structure containing K) were screened by using the condition that the open circuit voltage (OCV) was greater than 3 V. ICSD is the ICSD Collection Code, STRU is the chemical formula. The a, b, c (Å) and  $\alpha$ ,  $\beta$ ,  $\gamma$  ( $^\circ$ ) are unit cell parameters. V (Å<sup>3</sup>) is the cell volume.

| ID    | STRU                                                                                         | a     | b     | c     | $\alpha$ | $\beta$ | $\gamma$ | V       |
|-------|----------------------------------------------------------------------------------------------|-------|-------|-------|----------|---------|----------|---------|
| 16557 | KTiNbO <sub>5</sub>                                                                          | 6.46  | 3.79  | 18.47 | 90.00    | 90.00   | 90.00    | 452.43  |
| 18022 | KZn(BeF <sub>3</sub> ) <sub>3</sub>                                                          | 6.58  | 6.58  | 9.62  | 90.00    | 90.00   | 120.00   | 361.15  |
| 30886 | KCu(PO <sub>4</sub> )                                                                        | 17.94 | 6.74  | 6.80  | 90.00    | 90.00   | 90.00    | 821.87  |
| 30910 | NaKGeO <sub>3</sub>                                                                          | 10.68 | 6.90  | 4.80  | 90.00    | 90.00   | 90.00    | 353.52  |
| 31021 | KAgCO <sub>3</sub>                                                                           | 20.50 | 5.82  | 6.00  | 90.00    | 90.00   | 90.00    | 715.86  |
| 36380 | K <sub>2</sub> Na(FeO <sub>3</sub> )                                                         | 11.01 | 6.20  | 6.71  | 90.00    | 90.00   | 90.00    | 457.63  |
| 36612 | K <sub>2</sub> Na <sub>4</sub> (FeO <sub>3</sub> ) <sub>2</sub>                              | 6.51  | 6.20  | 10.21 | 90.00    | 90.00   | 90.00    | 411.38  |
| 39440 | KCrPO <sub>4</sub> F                                                                         | 6.35  | 10.56 | 12.78 | 90.00    | 90.00   | 90.00    | 855.76  |
| 39697 | K <sub>2</sub> (Zr <sub>0.86</sub> Ti <sub>0.14</sub> )<br>(Si <sub>3</sub> O <sub>9</sub> ) | 10.21 | 13.24 | 7.17  | 90.00    | 90.00   | 90.00    | 969.57  |
| 39735 | KGeOPO <sub>4</sub>                                                                          | 12.60 | 6.31  | 10.00 | 90.00    | 90.00   | 90.00    | 794.77  |
| 48118 | KNa <sub>4</sub> (GaO <sub>4</sub> )                                                         | 10.46 | 5.96  | 18.71 | 90.00    | 90.00   | 90.00    | 1167.17 |
| 48119 | CsK <sub>4</sub> (GaO <sub>4</sub> )                                                         | 11.55 | 6.68  | 20.97 | 90.00    | 90.00   | 90.00    | 1616.46 |
| 48177 | KLi <sub>2</sub> (BO <sub>3</sub> )                                                          | 7.97  | 6.43  | 6.46  | 90.00    | 90.00   | 90.00    | 331.05  |
| 59281 | K <sub>2</sub> MgWO <sub>2</sub> (PO <sub>4</sub> ) <sub>2</sub>                             | 9.14  | 9.16  | 10.74 | 90.28    | 90.52   | 90.11    | 898.89  |
| 59285 | K(TiO)(PO <sub>4</sub> )                                                                     | 12.80 | 6.39  | 10.59 | 90.00    | 90.00   | 90.00    | 866.17  |
| 62064 | CsK <sub>2</sub> AuO <sub>2</sub>                                                            | 12.57 | 7.27  | 6.28  | 90.00    | 90.00   | 90.00    | 573.81  |
| 62102 | K <sub>9</sub> Li <sub>3</sub> (IO <sub>6</sub> ) <sub>2</sub> O                             | 9.55  | 9.55  | 11.72 | 90.00    | 90.00   | 120.00   | 925.65  |
| 62136 | K <sub>2</sub> Na <sub>4</sub> (GaO <sub>3</sub> ) <sub>2</sub>                              | 6.52  | 6.13  | 10.25 | 90.00    | 90.00   | 90.00    | 409.29  |
| 63544 | KNi(AsO <sub>4</sub> )                                                                       | 4.97  | 4.97  | 28.53 | 90.00    | 90.00   | 120.00   | 610.73  |
| 65260 | KLi <sub>4</sub> (AlO <sub>4</sub> )                                                         | 5.54  | 15.44 | 11.03 | 90.00    | 109.71  | 90.00    | 889.14  |
| 65291 | K <sub>3</sub> (LiSiO <sub>4</sub> )                                                         | 11.33 | 9.74  | 11.77 | 90.00    | 121.30  | 90.00    | 1109.50 |
| 65942 | Cs <sub>2</sub> K <sub>4</sub> (Fe <sub>2</sub> O <sub>5</sub> )                             | 7.07  | 11.39 | 7.00  | 90.00    | 91.76   | 90.00    | 563.25  |
| 65976 | K <sub>11</sub> (Li(MnO <sub>4</sub> ) <sub>4</sub> )                                        | 7.87  | 7.87  | 17.51 | 90.00    | 90.00   | 90.00    | 1084.95 |
| 65978 | K <sub>3</sub> Na <sub>2</sub> (LiTeO <sub>6</sub> )                                         | 9.28  | 11.87 | 6.79  | 90.00    | 93.80   | 90.00    | 746.46  |
| 68706 | KSnO(PO <sub>4</sub> )                                                                       | 13.15 | 6.53  | 10.38 | 90.00    | 90.00   | 90.00    | 890.27  |
| 69429 | K(SbO)(SiO <sub>4</sub> )                                                                    | 13.01 | 6.47  | 10.61 | 90.00    | 90.00   | 90.00    | 893.75  |
| 69556 | KVO(PO <sub>4</sub> )                                                                        | 12.76 | 10.52 | 6.36  | 90.00    | 90.00   | 90.00    | 854.27  |
| 71536 | K <sub>2</sub> Co(SeO <sub>3</sub> ) <sub>2</sub>                                            | 5.52  | 5.52  | 18.52 | 90.00    | 90.00   | 120.00   | 488.00  |
| 71540 | K <sub>2</sub> Mn(SeO <sub>3</sub> ) <sub>2</sub>                                            | 5.62  | 5.62  | 18.67 | 90.00    | 90.00   | 120.00   | 509.69  |
| 72873 | K <sub>3</sub> (NbP <sub>2</sub> O <sub>9</sub> )                                            | 5.21  | 17.70 | 9.75  | 90.00    | 90.48   | 90.00    | 899.61  |
| 73205 | K <sub>5</sub> Li(Ge <sub>2</sub> O <sub>7</sub> )                                           | 6.25  | 15.87 | 10.58 | 90.00    | 109.38  | 90.00    | 989.82  |
| 74591 | K(TiO)(AsO <sub>4</sub> )                                                                    | 13.12 | 6.57  | 10.78 | 90.00    | 90.00   | 90.00    | 928.52  |
| 74955 | CsK <sub>4</sub> (TiO <sub>4</sub> )                                                         | 11.92 | 6.86  | 21.44 | 90.00    | 90.00   | 90.00    | 1752.15 |
| 74956 | K <sub>4</sub> Na <sub>2</sub> (Ti <sub>2</sub> O <sub>6</sub> )                             | 6.41  | 6.91  | 11.88 | 90.00    | 95.69   | 90.00    | 524.17  |

|        |                                    |       |       |       |       |        |        |         |
|--------|------------------------------------|-------|-------|-------|-------|--------|--------|---------|
| 76891  | $K_2Pb(SO_4)_2$                    | 5.59  | 5.59  | 20.69 | 90.00 | 90.00  | 120.00 | 559.40  |
| 79650  | $K(SnO)(PO_4)$                     | 13.17 | 6.54  | 10.75 | 90.00 | 90.00  | 90.00  | 925.30  |
| 79651  | $KVO(PO_4)$                        | 12.82 | 6.39  | 10.56 | 90.00 | 90.00  | 90.00  | 864.21  |
| 79702  | $K_2Ni(WO_2(PO_4)_2)$              | 9.16  | 9.16  | 10.68 | 90.00 | 90.00  | 90.00  | 896.14  |
| 80023  | $K(TiO)((P_{0.56}As_{0.44})O_4)$   | 12.95 | 6.48  | 10.66 | 90.00 | 90.00  | 90.00  | 894.19  |
| 80893  | $KGaF(PO_4)$                       | 12.72 | 6.30  | 10.43 | 90.00 | 90.00  | 90.00  | 835.98  |
| 81479  | $K_6(VO)_4(SO_4)_8$                | 8.93  | 18.30 | 9.97  | 90.00 | 90.11  | 90.00  | 1629.90 |
| 82398  | $K_2(Be_2Si_3O_9)$                 | 10.26 | 6.94  | 12.18 | 90.00 | 106.76 | 90.00  | 829.99  |
| 82457  | $KLi(Si_2O_5)$                     | 5.98  | 4.80  | 8.16  | 90.00 | 93.48  | 90.00  | 233.78  |
| 83431  | $K_2Ca_2(CO_3)_3$                  | 13.01 | 13.01 | 8.62  | 90.00 | 90.00  | 120.00 | 1262.82 |
| 85404  | $K_6(CuSi_2O_8)$                   | 6.19  | 6.66  | 7.53  | 83.66 | 87.71  | 70.19  | 290.24  |
| 85505  | $K_2Ca(NO_2)_4$                    | 9.45  | 5.45  | 10.91 | 90.00 | 88.57  | 90.00  | 561.82  |
| 88843  | $K_2Zr(Ge_2O_7)$                   | 9.96  | 5.56  | 12.96 | 90.00 | 105.17 | 90.00  | 692.31  |
| 91534  | $K(Ti_{0.936}Sn_{0.064})O(PO_4)$   | 12.83 | 6.41  | 10.58 | 90.00 | 90.00  | 90.00  | 870.50  |
| 95959  | $K_2(ZnP_2O_7)$                    | 7.86  | 7.86  | 11.32 | 90.00 | 90.00  | 90.00  | 699.11  |
| 98708  | $Na_{0.667}K_{1.333}(Si_2O_5)$     | 12.73 | 7.32  | 17.83 | 90.00 | 100.85 | 90.00  | 1631.84 |
| 150841 | $K_2((Mo_{0.5}W_{0.5})O_4)$        | 12.38 | 6.11  | 7.55  | 90.00 | 115.80 | 90.00  | 514.28  |
| 170786 | $K_{1.33}Na_{0.67}Si_2O_5$         | 19.68 | 7.27  | 12.57 | 90.00 | 117.82 | 90.00  | 1589.86 |
| 200310 | $K_2Ni(MoO_4)_2$                   | 8.47  | 19.04 | 10.84 | 90.00 | 90.00  | 90.00  | 1747.49 |
| 200388 | $K_8Zr(MoO_4)_6$                   | 10.20 | 11.85 | 13.12 | 90.00 | 119.00 | 90.00  | 1386.98 |
| 200389 | $K_8Hf(MoO_4)_6$                   | 10.18 | 11.77 | 13.10 | 90.00 | 118.82 | 90.00  | 1374.86 |
| 200613 | $KFe(PO_4)F$                       | 10.66 | 12.89 | 6.37  | 90.00 | 90.00  | 90.00  | 874.62  |
| 201788 | $K_2(SbPO_6)$                      | 9.43  | 5.89  | 11.03 | 90.00 | 90.00  | 90.00  | 612.67  |
| 202071 | $K_3Li_3TeO_6$                     | 11.70 | 5.99  | 9.69  | 90.00 | 90.00  | 90.00  | 678.40  |
| 202073 | $K_4Na_2(TeO_6)$                   | 7.26  | 9.83  | 6.67  | 90.00 | 122.74 | 90.00  | 399.93  |
| 202428 | $K_3Bi_2(VO_4)_3$                  | 13.96 | 13.86 | 7.10  | 90.00 | 112.80 | 90.00  | 1265.06 |
| 202560 | $K_4Li(IO_6)$                      | 13.12 | 9.98  | 11.19 | 90.00 | 90.00  | 90.00  | 1465.58 |
| 202980 | $K_3(NbAs_2O_9)$                   | 22.39 | 5.44  | 7.87  | 90.00 | 90.00  | 90.00  | 957.83  |
| 203214 | $K_2(Mn_3(OH)_2(VO_4)_2)$          | 15.20 | 6.16  | 5.40  | 90.00 | 105.40 | 90.00  | 487.51  |
| 203218 | $K(MoO_2)(AsO_4)$                  | 10.68 | 6.62  | 6.98  | 90.00 | 90.00  | 90.00  | 493.16  |
| 280310 | $K_2(Al_2Sb_2O_7)$                 | 5.63  | 5.63  | 8.05  | 90.00 | 90.00  | 120.00 | 221.03  |
| 280327 | $K_2(TiSi_3O_9)(H_2O)$             | 7.15  | 9.94  | 12.95 | 90.00 | 90.00  | 90.00  | 920.71  |
| 400850 | $K_2(TiO)_2(As_{.43}P_{.57}O_4)_2$ | 12.95 | 6.48  | 10.68 | 90.00 | 90.00  | 90.00  | 895.69  |
| 409484 | $K(Ag(CO_3))$                      | 20.39 | 5.78  | 5.94  | 90.00 | 90.00  | 90.00  | 699.89  |
| 409582 | $K_3Bi_2(PO_4)_3$                  | 13.83 | 13.48 | 6.81  | 90.00 | 114.94 | 90.00  | 1150.86 |
| 411501 | $K_3(BSb_4O_{13})$                 | 7.13  | 7.23  | 13.26 | 82.00 | 99.77  | 117.08 | 598.67  |

|        |                                                   |      |       |       |       |       |       |        |
|--------|---------------------------------------------------|------|-------|-------|-------|-------|-------|--------|
| 412877 | BaK(FeO <sub>3</sub> )                            | 5.80 | 11.53 | 12.78 | 90.00 | 90.00 | 90.00 | 854.82 |
| 417892 | K <sub>2</sub> Mn(V <sub>2</sub> O <sub>7</sub> ) | 8.61 | 8.61  | 5.54  | 90.00 | 90.00 | 90.00 | 410.45 |

---

**Table S5.** The 72 compounds (Optimized structure containing  $\text{NH}_4^+$ ) were screened by using the condition that the open circuit voltage (OCV) was greater than 3 V. ICSD is the ICSD Collection Code, STRU is the Struct formula. The  $a'$ ,  $b'$ ,  $c'$ (Å) and  $\alpha'$ ,  $\beta'$ ,  $\gamma'$ (°) are unit cell parameters.  $V'$ (Å<sup>3</sup>) is the cell volume.

| ICSD  | STRU                                                                                           | $a'$  | $b'$  | $c'$  | $\alpha'$ | $\beta'$ | $\gamma'$ | $V'$    |
|-------|------------------------------------------------------------------------------------------------|-------|-------|-------|-----------|----------|-----------|---------|
| 16557 | $\text{NH}_4\text{TiNbO}_5$                                                                    | 6.61  | 3.83  | 19.09 | 90.00     | 90.00    | 90.02     | 483.36  |
| 18022 | $\text{NH}_4\text{Zn}(\text{BeF}_3)_3$                                                         | 6.78  | 6.78  | 9.80  | 90.00     | 90.00    | 120.01    | 390.72  |
| 30886 | $\text{NH}_4\text{Cu}(\text{PO}_4)$                                                            | 6.65  | 7.64  | 18.47 | 90.00     | 90.00    | 90.00     | 938.31  |
| 30910 | $\text{NaNH}_4\text{GeO}_3$                                                                    | 4.88  | 7.04  | 11.04 | 90.00     | 90.00    | 89.93     | 378.93  |
| 31021 | $\text{NH}_4\text{AgCO}_3$                                                                     | 6.19  | 6.13  | 11.44 | 105.54    | 105.68   | 90.00     | 401.66  |
| 36380 | $(\text{NH}_4)_2\text{Na}(\text{FeO}_3)$                                                       | 6.43  | 6.72  | 7.18  | 90.00     | 90.00    | 119.62    | 269.91  |
| 36612 | $(\text{NH}_4)_2\text{Na}_4(\text{FeO}_3)_2$                                                   | 6.38  | 7.32  | 10.27 | 90.00     | 90.00    | 86.81     | 478.55  |
| 39440 | $\text{NH}_4\text{CrPO}_4\text{F}$                                                             | 6.49  | 10.76 | 13.04 | 90.00     | 90.00    | 90.00     | 910.87  |
| 39697 | $(\text{NH}_4)_2(\text{Zr}_{0.86}\text{Ti}_{0.14})(\text{Si}_3\text{O}_9)(\text{H}_2\text{O})$ | 10.64 | 13.47 | 7.40  | 89.10     | 90.62    | 89.63     | 1060.22 |
| 39735 | $\text{NH}_4\text{GeOPO}_4$                                                                    | 6.55  | 10.15 | 12.84 | 89.70     | 89.80    | 89.89     | 853.99  |
| 48118 | $\text{NH}_4\text{Na}_4(\text{GaO}_4)$                                                         | 5.80  | 11.34 | 19.66 | 90.00     | 90.00    | 90.00     | 1293.73 |
| 48119 | $\text{Cs}(\text{NH}_4)_4(\text{GaO}_4)$                                                       | 7.32  | 12.44 | 24.21 | 90.00     | 90.00    | 88.90     | 2201.95 |
| 48177 | $\text{NH}_4\text{Li}_2(\text{BO}_3)$                                                          | 6.44  | 6.50  | 8.52  | 90.00     | 90.12    | 90.00     | 356.73  |
| 59281 | $(\text{NH}_4)_2\text{MgWO}_2(\text{PO}_4)_2$                                                  | 9.43  | 9.45  | 10.87 | 89.66     | 90.53    | 89.80     | 968.91  |
| 59285 | $\text{NH}_4(\text{TiO})(\text{PO}_4)$                                                         | 6.58  | 10.71 | 13.05 | 89.85     | 90.06    | 89.97     | 919.61  |
| 62064 | $\text{Cs}(\text{NH}_4)_2\text{AuO}_2$                                                         | 7.12  | 7.74  | 13.55 | 87.18     | 90.00    | 90.00     | 745.12  |
| 62102 | $(\text{NH}_4)_9\text{Li}_3(\text{IO}_6)_2\text{O}$                                            | 9.82  | 10.14 | 12.93 | 90.00     | 90.00    | 121.23    | 1101.02 |
| 62136 | $(\text{NH}_4)_2\text{Na}_4(\text{GaO}_3)_2$                                                   | 6.17  | 7.31  | 10.36 | 90.00     | 90.00    | 87.41     | 466.72  |
| 63544 | $\text{NH}_4\text{Ni}(\text{AsO}_4)$                                                           | 5.04  | 5.04  | 10.63 | 76.31     | 76.29    | 60.02     | 225.14  |
| 65260 | $\text{NH}_4\text{Li}_4(\text{AlO}_4)$                                                         | 5.60  | 10.66 | 16.47 | 90.01     | 90.00    | 100.22    | 968.35  |
| 65291 | $(\text{NH}_4)_3(\text{LiSiO}_4)$                                                              | 10.03 | 12.07 | 12.20 | 119.08    | 90.07    | 90.10     | 1291.13 |
| 65942 | $\text{Cs}_2(\text{NH}_4)_4(\text{Fe}_2\text{O}_5)$                                            | 7.19  | 7.25  | 7.56  | 87.08     | 92.78    | 119.23    | 343.63  |
| 65976 | $(\text{NH}_4)_{11}(\text{Li}(\text{MnO}_4)_4)$                                                | 8.85  | 8.82  | 10.69 | 115.36    | 113.80   | 89.66     | 675.73  |
| 65978 | $(\text{NH}_4)_3\text{Na}_2(\text{LiTeO}_6)$                                                   | 6.88  | 7.93  | 8.10  | 107.73    | 92.26    | 92.06     | 420.05  |
| 68706 | $\text{NH}_4\text{SnO}(\text{PO}_4)$                                                           | 6.71  | 10.92 | 13.42 | 90.31     | 89.65    | 90.21     | 983.56  |
| 69429 | $\text{NH}_4(\text{SbO})(\text{SiO})$                                                          | 6.65  | 10.83 | 13.27 | 89.86     | 89.90    | 90.13     | 954.77  |

|       |                                                                                           |       |       |       |        |        |        |         |
|-------|-------------------------------------------------------------------------------------------|-------|-------|-------|--------|--------|--------|---------|
| 69556 | 4)<br>NH <sub>4</sub> VO(PO <sub>4</sub> )                                                | 6.55  | 10.66 | 13.05 | 90.00  | 90.00  | 90.00  | 911.24  |
| 71536 | (NH <sub>4</sub> ) <sub>2</sub> Co(SeO <sub>3</sub> ) <sub>2</sub>                        | 5.46  | 5.60  | 7.47  | 67.82  | 68.58  | 60.80  | 179.91  |
| 71540 | (NH <sub>4</sub> ) <sub>2</sub> Mn(SeO <sub>3</sub> ) <sub>2</sub>                        | 5.68  | 5.68  | 7.58  | 67.99  | 68.05  | 59.99  | 191.25  |
| 72873 | (NH <sub>4</sub> ) <sub>3</sub> (NbP <sub>2</sub> O <sub>9</sub> )                        | 5.20  | 9.89  | 19.81 | 90.08  | 90.21  | 90.47  | 1019.23 |
| 73205 | (NH <sub>4</sub> ) <sub>5</sub> Li(Ge <sub>2</sub> O <sub>7</sub> )                       | 6.72  | 10.75 | 16.78 | 88.97  | 91.39  | 105.48 | 1167.25 |
| 74591 | NH <sub>4</sub> (TiO)(AsO <sub>4</sub> )                                                  | 6.75  | 10.97 | 13.37 | 89.75  | 89.69  | 89.63  | 989.23  |
| 74955 | Cs(NH <sub>4</sub> ) <sub>4</sub> (TiO <sub>4</sub> )                                     | 7.65  | 13.53 | 22.93 | 90.00  | 90.00  | 91.15  | 2372.76 |
| 74956 | (NH <sub>4</sub> ) <sub>4</sub> Na <sub>2</sub> (Ti <sub>2</sub> O <sub>6</sub> )         | 6.96  | 7.00  | 12.63 | 91.40  | 90.92  | 90.12  | 615.03  |
| 76891 | (NH <sub>4</sub> ) <sub>2</sub> Pb(SO <sub>4</sub> ) <sub>2</sub>                         | 5.64  | 5.90  | 8.81  | 69.79  | 63.63  | 57.05  | 218.35  |
| 79650 | NH <sub>4</sub> (SnO)(PO <sub>4</sub> )                                                   | 6.71  | 10.92 | 13.43 | 90.00  | 90.00  | 89.87  | 983.87  |
| 79651 | NH <sub>4</sub> VO(PO <sub>4</sub> )                                                      | 6.55  | 10.64 | 13.04 | 89.70  | 89.64  | 90.11  | 909.35  |
| 79702 | (NH <sub>4</sub> ) <sub>2</sub> Ni(WO <sub>2</sub> (PO <sub>4</sub> ) <sub>2</sub> )      | 9.49  | 9.43  | 10.77 | 90.14  | 89.77  | 90.07  | 964.34  |
| 80023 | NH <sub>4</sub> (TiO)((P <sub>0.5</sub> <sub>6</sub> As <sub>0.44</sub> )O <sub>4</sub> ) | 13.20 | 6.71  | 10.85 | 90.14  | 89.78  | 89.61  | 960.44  |
| 80893 | NH <sub>4</sub> GaF(PO <sub>4</sub> )                                                     | 6.47  | 10.60 | 13.06 | 89.86  | 89.39  | 89.86  | 895.06  |
| 81479 | (NH <sub>4</sub> ) <sub>6</sub> (VO) <sub>4</sub> (SO <sub>4</sub> ) <sub>8</sub>         | 9.73  | 10.03 | 18.90 | 90.01  | 90.09  | 90.55  | 1844.83 |
| 82398 | (NH <sub>4</sub> ) <sub>2</sub> (Be <sub>2</sub> Si <sub>3</sub> O <sub>9</sub> )         | 7.03  | 10.50 | 12.23 | 105.11 | 90.00  | 90.00  | 871.74  |
| 82457 | NH <sub>4</sub> Li(Si <sub>2</sub> O <sub>5</sub> )                                       | 4.82  | 6.30  | 8.45  | 94.93  | 89.99  | 90.03  | 255.75  |
| 83431 | (NH <sub>4</sub> ) <sub>2</sub> Ca <sub>2</sub> (CO <sub>3</sub> ) <sub>3</sub>           | 8.30  | 8.49  | 8.21  | 109.92 | 105.83 | 108.71 | 465.56  |
| 85404 | (NH <sub>4</sub> ) <sub>6</sub> (CuSi <sub>2</sub> O <sub>8</sub> )                       | 6.77  | 6.77  | 8.08  | 92.16  | 87.74  | 70.67  | 348.41  |
| 85505 | (NH <sub>4</sub> ) <sub>2</sub> Ca(NO <sub>2</sub> ) <sub>4</sub>                         | 6.43  | 4.96  | 12.76 | 83.57  | 96.42  | 52.18  | 310.79  |
| 88843 | (NH <sub>4</sub> ) <sub>2</sub> Zr(Ge <sub>2</sub> O <sub>7</sub> )                       | 5.70  | 5.78  | 13.74 | 77.30  | 78.04  | 60.45  | 381.73  |
| 91534 | NH <sub>4</sub> (Ti <sub>0.936</sub> Sn <sub>0.064</sub> )O(PO <sub>4</sub> )             | 13.02 | 6.56  | 10.69 | 89.91  | 89.56  | 89.83  | 913.43  |
| 95959 | (NH <sub>4</sub> ) <sub>2</sub> (ZnP <sub>2</sub> O <sub>7</sub> )                        | 7.99  | 8.03  | 12.15 | 90.00  | 90.00  | 90.14  | 779.48  |
| 98708 | Na <sub>0.667</sub> (NH <sub>4</sub> ) <sub>1.3</sub>                                     | 7.48  | 10.94 | 12.86 | 67.72  | 72.65  | 70.12  | 898.15  |

|        |                                                                                                                              |       |       |       |        |        |        |         |
|--------|------------------------------------------------------------------------------------------------------------------------------|-------|-------|-------|--------|--------|--------|---------|
| 150841 | ${}_{33}(\text{Si}_2\text{O}_5)$<br>( $\text{NH}_4$ ) <sub>2</sub> (( $\text{Mo}_{0.5}$<br>$\text{W}_{0.5}$ ) $\text{O}_4$ ) | 11.89 | 6.98  | 8.05  | 80.34  | 118.38 | 94.03  | 579.29  |
| 170786 | ( $\text{NH}_4$ ) <sub>1.33</sub> $\text{Na}_{0.67}$<br>$\text{Si}_2\text{O}_5$                                              | 7.44  | 10.96 | 12.98 | 67.39  | 73.02  | 70.32  | 903.60  |
| 200310 | ( $\text{NH}_4$ ) <sub>2</sub> $\text{Ni}(\text{MoO}$<br>$_4)_2$                                                             | 8.49  | 11.01 | 11.10 | 90.00  | 90.00  | 113.02 | 955.38  |
| 200388 | ( $\text{NH}_4$ ) <sub>8</sub> $\text{Zr}(\text{MoO}$<br>$_4)_6$                                                             | 10.94 | 12.23 | 12.66 | 89.94  | 107.12 | 89.85  | 1618.43 |
| 200389 | ( $\text{NH}_4$ ) <sub>8</sub> $\text{Hf}(\text{MoO}$<br>$_4)_6$                                                             | 10.89 | 12.16 | 12.75 | 90.00  | 107.86 | 90.01  | 1608.49 |
| 200613 | $\text{NH}_4\text{Fe}(\text{PO}_4)\text{F}$                                                                                  | 6.52  | 10.81 | 13.13 | 90.00  | 90.00  | 90.00  | 925.15  |
| 201788 | ( $\text{NH}_4$ ) <sub>2</sub> ( $\text{SbPO}_6$ )                                                                           | 6.02  | 9.82  | 11.92 | 90.00  | 90.00  | 90.00  | 704.20  |
| 202071 | ( $\text{NH}_4$ ) <sub>3</sub> $\text{Li}_3\text{TeO}_6$                                                                     | 6.13  | 9.88  | 12.47 | 90.00  | 88.76  | 90.00  | 754.32  |
| 202073 | ( $\text{NH}_4$ ) <sub>4</sub> $\text{Na}_2(\text{TeO}$<br>$_6)$                                                             | 7.13  | 7.13  | 9.79  | 95.17  | 84.83  | 114.79 | 449.02  |
| 202428 | ( $\text{NH}_4$ ) <sub>3</sub> $\text{Bi}_2(\text{VO}_4$<br>$)_3$                                                            | 7.35  | 10.28 | 10.12 | 88.36  | 73.24  | 72.87  | 698.80  |
| 202560 | ( $\text{NH}_4$ ) <sub>4</sub> $\text{Li}(\text{IO}_6)$                                                                      | 10.17 | 11.91 | 14.17 | 90.00  | 89.93  | 90.00  | 1716.48 |
| 202980 | ( $\text{NH}_4$ ) <sub>3</sub> ( $\text{NbAs}_2$<br>$\text{O}_9$ )                                                           | 5.48  | 8.36  | 23.43 | 90.00  | 89.63  | 90.00  | 1073.23 |
| 203214 | ( $\text{NH}_4$ ) <sub>2</sub> ( $\text{Mn}_3(\text{O}$<br>$\text{H})_2(\text{VO}_4)_2$ )                                    | 5.54  | 6.37  | 8.21  | 112.86 | 101.09 | 90.00  | 261.09  |
| 203218 | $\text{NH}_4(\text{MoO}_2)(\text{As}$<br>$\text{O}_4)$                                                                       | 6.72  | 7.29  | 11.07 | 90.00  | 90.00  | 90.00  | 542.13  |
| 280310 | ( $\text{NH}_4$ ) <sub>2</sub> ( $\text{Al}_2\text{Sb}_2$<br>$\text{O}_7$ )                                                  | 5.68  | 5.75  | 9.01  | 89.95  | 82.24  | 120.43 | 250.79  |
| 280327 | ( $\text{NH}_4$ ) <sub>2</sub> ( $\text{TiSi}_3\text{O}_9$<br>$)_2(\text{H}_2\text{O})$                                      | 7.34  | 10.20 | 13.18 | 90.00  | 90.00  | 90.00  | 985.68  |
| 400850 | ( $\text{NH}_4$ ) <sub>2</sub> ( $\text{TiO}$ ) <sub>2</sub> (<br>$\text{As}_{.43}\text{P}_{.57}\text{O}_4$ ) <sub>2</sub>   | 13.22 | 6.69  | 10.85 | 89.96  | 89.70  | 89.70  | 959.36  |
| 409484 | $\text{NH}_4(\text{Ag}(\text{CO}_3))$                                                                                        | 6.20  | 6.13  | 11.44 | 105.54 | 105.73 | 90.00  | 402.23  |
| 409582 | ( $\text{NH}_4$ ) <sub>3</sub> $\text{Bi}_2(\text{PO}_4)$<br><sub>3</sub>                                                    | 7.08  | 10.13 | 9.78  | 88.09  | 72.68  | 71.73  | 634.82  |
| 411501 | ( $\text{NH}_4$ ) <sub>3</sub> ( $\text{BSb}_4\text{O}_{13}$ )                                                               | 7.24  | 7.38  | 13.70 | 83.06  | 80.94  | 62.83  | 642.27  |
| 412877 | $\text{BaNH}_4(\text{FeO}_3)$                                                                                                | 6.07  | 6.92  | 13.03 | 90.00  | 90.00  | 115.96 | 491.82  |
| 417892 | ( $\text{NH}_4$ ) <sub>2</sub> $\text{Mn}(\text{V}_2\text{O}$<br>$_7)$                                                       | 6.09  | 8.85  | 8.72  | 90.31  | 94.78  | 92.06  | 467.77  |

**Table S6.** Specific capacity C(mAh/g), type, open circuit voltage OCV(V), band gap(eV) and direct band gap (“T” represents a direct band gap, and “F” represents an indirect band gap) of the 72 compounds. ID is the ICSD Collection Code, STRU is the Struct formula. and Ver(%) is the volume expansion rate.

| ID    | STRU                                                                                                                            | C      | type    | OCV  | band_gap | direct_gap | Ver   |
|-------|---------------------------------------------------------------------------------------------------------------------------------|--------|---------|------|----------|------------|-------|
| 16557 | NH <sub>4</sub> TiNbO <sub>5</sub>                                                                                              | 121.22 | layered | 5.24 | 2.88     | F          | 6.84  |
| 18022 | NH <sub>4</sub> Zn(BeF <sub>3</sub> ) <sub>3</sub>                                                                              | 101.86 | tunnel  | 6.85 | 6.14     | F          | 8.19  |
| 30886 | NH <sub>4</sub> Cu(PO <sub>4</sub> )                                                                                            | 168.48 | layered | 4.90 | 0.23     | T          | 14.17 |
| 30910 | NaNH <sub>4</sub> GeO <sub>3</sub>                                                                                              | 186.03 | tunnel  | 4.37 | 3.31     | F          | 7.19  |
| 31021 | NH <sub>4</sub> AgCO <sub>3</sub>                                                                                               | 159.46 | layered | 4.48 | 2.37     | T          | 12.22 |
| 36380 | (NH <sub>4</sub> ) <sub>2</sub> Na(FeO <sub>3</sub> )                                                                           | 421.87 | tunnel  | 4.75 | 2.22     | F          | 17.96 |
| 36612 | (NH <sub>4</sub> ) <sub>2</sub> Na <sub>4</sub> (FeO <sub>3</sub> ) <sub>2</sub>                                                | 178.59 | tunnel  | 3.61 | 2.50     | F          | 16.33 |
| 39440 | NH <sub>4</sub> CrPO <sub>4</sub> F                                                                                             | 161.38 | tunnel  | 4.80 | 2.57     | F          | 6.44  |
| 39697 | (NH <sub>4</sub> ) <sub>2</sub> (Zr <sub>0.86</sub> Ti <sub>0.14</sub> )<br>(Si <sub>3</sub> O <sub>9</sub> )(H <sub>2</sub> O) | 171.19 | tunnel  | 3.76 | 0.04     | F          | 9.35  |
| 39735 | NH <sub>4</sub> GeOPO <sub>4</sub>                                                                                              | 145.59 | tunnel  | 5.04 | 3.15     | T          | 7.45  |
| 48118 | NH <sub>4</sub> Na <sub>4</sub> (GaO <sub>4</sub> )                                                                             | 118.54 | layered | 3.83 | 2.40     | T          | 10.84 |
| 48119 | Cs(NH <sub>4</sub> ) <sub>4</sub> (GaO <sub>4</sub> )                                                                           | 401.33 | layered | 3.39 | 2.62     | T          | 36.22 |
| 48177 | NH <sub>4</sub> Li <sub>2</sub> (BO <sub>3</sub> )                                                                              | 366.97 | tunnel  | 3.39 | 4.34     | T          | 7.76  |
| 59281 | (NH <sub>4</sub> ) <sub>2</sub> MgWO <sub>2</sub> (P<br>O <sub>4</sub> ) <sub>2</sub>                                           | 124.60 | tunnel  | 5.06 | 3.55     | F          | 7.79  |
| 59285 | NH <sub>4</sub> (TiO)(PO <sub>4</sub> )                                                                                         | 168.48 | tunnel  | 5.16 | 3.07     | F          | 6.17  |
| 62064 | Cs(NH <sub>4</sub> ) <sub>2</sub> AuO <sub>2</sub>                                                                              | 148.01 | layered | 3.33 | 3.24     | F          | 29.85 |
| 62102 | (NH <sub>4</sub> ) <sub>9</sub> Li <sub>3</sub> (IO <sub>6</sub> ) <sub>2</sub> O                                               | 623.00 | tunnel  | 4.46 | 2.33     | F          | 18.95 |
| 62136 | (NH <sub>4</sub> ) <sub>2</sub> Na <sub>4</sub> (GaO <sub>3</sub> ) <sub>2</sub>                                                | 163.35 | tunnel  | 4.02 | 2.60     | F          | 14.03 |
| 63544 | NH <sub>4</sub> Ni(AsO <sub>4</sub> )                                                                                           | 135.30 | layered | 5.76 | 2.82     | F          | 10.59 |
| 65260 | NH <sub>4</sub> Li <sub>4</sub> (AlO <sub>4</sub> )                                                                             | 273.36 | tunnel  | 3.95 | 4.16     | T          | 8.91  |
| 65291 | (NH <sub>4</sub> ) <sub>3</sub> (LiSiO <sub>4</sub> )                                                                           | 811.79 | layered | 4.36 | 4.24     | F          | 16.37 |
| 65942 | Cs <sub>2</sub> (NH <sub>4</sub> ) <sub>4</sub> (Fe <sub>2</sub> O <sub>5</sub> )                                               | 329.71 | layered | 3.24 | 2.24     | F          | 22.02 |
| 65976 | (NH <sub>4</sub> ) <sub>11</sub> (Li(MnO <sub>4</sub> )<br>4)                                                                   | 610.10 | layered | 4.01 | 1.97     | F          | 24.56 |
| 65978 | (NH <sub>4</sub> ) <sub>3</sub> Na <sub>2</sub> (LiTeO <sub>6</sub><br>)                                                        | 290.13 | layered | 3.90 | 2.64     | F          | 12.55 |
| 68706 | NH <sub>4</sub> SnO(PO <sub>4</sub> )                                                                                           | 116.47 | tunnel  | 5.29 | 3.04     | T          | 10.48 |
| 69429 | NH <sub>4</sub> (SbO)(SiO <sub>4</sub> )                                                                                        | 116.47 | tunnel  | 5.33 | 2.67     | F          | 6.83  |
| 69556 | NH <sub>4</sub> VO(PO <sub>4</sub> )                                                                                            | 165.36 | tunnel  | 3.99 | 1.58     | T          | 6.67  |
| 71536 | (NH <sub>4</sub> ) <sub>2</sub> Co(SeO <sub>3</sub> ) <sub>2</sub>                                                              | 171.18 | layered | 3.97 | 2.32     | F          | 10.60 |
| 71540 | (NH <sub>4</sub> ) <sub>2</sub> Mn(SeO <sub>3</sub> ) <sub>2</sub>                                                              | 173.39 | layered | 3.88 | 3.62     | F          | 12.57 |
| 72873 | (NH <sub>4</sub> ) <sub>3</sub> (NbP <sub>2</sub> O <sub>9</sub> )                                                              | 268.79 | tunnel  | 5.08 | 3.13     | F          | 13.30 |
| 73205 | (NH <sub>4</sub> ) <sub>5</sub> Li(Ge <sub>2</sub> O <sub>7</sub> )                                                             | 505.45 | layered | 3.87 | 3.58     | F          | 17.93 |
| 74591 | NH <sub>4</sub> (TiO)(AsO <sub>4</sub> )                                                                                        | 131.97 | tunnel  | 5.13 | 3.13     | T          | 6.54  |
| 74955 | Cs(NH <sub>4</sub> ) <sub>4</sub> (TiO <sub>4</sub> )                                                                           | 267.22 | layered | 3.20 | 1.72     | T          | 35.42 |
| 74956 | (NH <sub>4</sub> ) <sub>4</sub> Na <sub>2</sub> (Ti <sub>2</sub> O <sub>6</sub> )                                               | 194.83 | tunnel  | 3.03 | 1.46     | T          | 17.33 |

|        |                                                                             |        |         |      |      |   |       |
|--------|-----------------------------------------------------------------------------|--------|---------|------|------|---|-------|
| 76891  | $(\text{NH}_4)_2\text{Pb}(\text{SO}_4)_2$                                   | 134.28 | layered | 5.11 | 4.63 | F | 17.10 |
| 79650  | $\text{NH}_4(\text{SnO})(\text{PO}_4)$                                      | 116.47 | tunnel  | 5.30 | 3.02 | T | 6.33  |
| 79651  | $\text{NH}_4\text{VO}(\text{PO}_4)$                                         | 165.36 | tunnel  | 3.98 | 1.55 | T | 5.22  |
| 79702  | $(\text{NH}_4)_2\text{Ni}(\text{WO}_2(\text{PO}_4)_2)$                      | 123.45 | tunnel  | 4.93 | 3.38 | F | 7.61  |
| 80023  | $\text{NH}_4(\text{TiO})(\text{P}_{0.56}\text{As}_{0.44}\text{O}_4)$        | 150.20 | tunnel  | 5.15 | 3.12 | F | 7.41  |
| 80893  | $\text{NH}_4\text{GaF}(\text{PO}_4)$                                        | 145.59 | tunnel  | 5.18 | 3.98 | F | 7.07  |
| 81479  | $(\text{NH}_4)_6(\text{VO})_4(\text{SO}_4)_8$                               | 155.15 | layered | 5.24 | 1.30 | F | 13.19 |
| 82398  | $(\text{NH}_4)_2(\text{Be}_2\text{Si}_3\text{O}_9)$                         | 217.80 | tunnel  | 4.92 | 5.03 | F | 5.03  |
| 82457  | $\text{NH}_4\text{Li}(\text{Si}_2\text{O}_5)$                               | 187.34 | tunnel  | 4.99 | 4.98 | F | 9.40  |
| 83431  | $(\text{NH}_4)_2\text{Ca}_2(\text{CO}_3)_3$                                 | 206.07 | tunnel  | 4.35 | 4.52 | T | 10.60 |
| 85404  | $(\text{NH}_4)_6(\text{CuSi}_2\text{O}_8)$                                  | 648.12 | layered | 3.65 | 0.44 | T | 20.04 |
| 85505  | $(\text{NH}_4)_2\text{Ca}(\text{NO}_2)_4$                                   | 239.19 | layered | 3.89 | 2.11 | T | 10.64 |
| 88843  | $(\text{NH}_4)_2\text{Zr}(\text{Ge}_2\text{O}_7)$                           | 153.52 | tunnel  | 4.86 | 4.00 | F | 10.28 |
| 91534  | $\text{NH}_4(\text{Ti}_{0.936}\text{Sn}_{0.064}\text{O}(\text{PO}_4))$      | 163.80 | tunnel  | 4.90 |      |   | 4.93  |
| 95959  | $(\text{NH}_4)_2(\text{ZnP}_2\text{O}_7)$                                   | 224.18 | tunnel  | 5.14 | 4.01 | T | 11.50 |
| 98708  | $\text{Na}_{0.667}(\text{NH}_4)_{1.333}(\text{Si}_2\text{O}_5)$             | 235.96 | tunnel  | 4.97 | 4.52 | F | 10.08 |
| 150841 | $(\text{NH}_4)_2((\text{Mo}_{0.5}\text{W}_{0.5})\text{O}_4)$                | 262.64 | layered | 4.00 | 3.35 | F | 12.64 |
| 170786 | $(\text{NH}_4)_{1.33}\text{Na}_{0.67}\text{Si}_2\text{O}_5$                 | 235.32 | tunnel  | 4.48 | 4.42 | F | 13.67 |
| 200310 | $(\text{NH}_4)_2\text{Ni}(\text{MoO}_4)_2$                                  | 141.37 | layered | 5.16 | 3.85 | F | 9.34  |
| 200388 | $(\text{NH}_4)_8\text{Zr}(\text{MoO}_4)_6$                                  | 203.91 | tunnel  | 5.27 | 4.08 | F | 16.69 |
| 200389 | $(\text{NH}_4)_8\text{Hf}(\text{MoO}_4)_6$                                  | 188.32 | tunnel  | 5.07 | 4.25 | F | 16.99 |
| 200613 | $\text{NH}_4\text{Fe}(\text{PO}_4)\text{F}$                                 | 157.58 | tunnel  | 5.17 | 2.33 | F | 5.78  |
| 201788 | $(\text{NH}_4)_2(\text{SbPO}_6)$                                            | 215.17 | tunnel  | 5.29 | 2.73 | F | 14.94 |
| 202071 | $(\text{NH}_4)_3\text{Li}_3\text{TeO}_6$                                    | 328.03 | layered | 3.84 | 2.78 | T | 11.19 |
| 202073 | $(\text{NH}_4)_4\text{Na}_2(\text{TeO}_6)$                                  | 396.87 | layered | 3.98 | 2.80 | F | 12.27 |
| 202428 | $(\text{NH}_4)_3\text{Bi}_2(\text{VO}_4)_3$                                 | 105.33 | tunnel  | 4.57 | 2.68 | T | 10.48 |
| 202560 | $(\text{NH}_4)_4\text{Li}(\text{IO}_6)$                                     | 465.90 | layered | 4.43 | 2.41 | F | 17.12 |
| 202980 | $(\text{NH}_4)_3(\text{NbAs}_2\text{O}_9)$                                  | 207.67 | layered | 5.21 | 3.28 | F | 12.05 |
| 203214 | $(\text{NH}_4)_2(\text{Mn}_3(\text{OH})_2(\text{VO}_4)_2)$                  | 124.89 | tunnel  | 3.48 | 1.96 | F | 7.11  |
| 203218 | $\text{NH}_4(\text{MoO}_2)(\text{AsO}_4)$                                   | 100.33 | tunnel  | 5.24 | 2.86 | F | 9.93  |
| 280310 | $(\text{NH}_4)_2(\text{Al}_2\text{Sb}_2\text{O}_7)$                         | 130.68 | layered | 4.80 | 3.63 | F | 13.46 |
| 280327 | $(\text{NH}_4)_2(\text{TiSi}_3\text{O}_9)(\text{H}_2\text{O})$              | 194.12 | tunnel  | 5.19 | 3.46 | F | 7.06  |
| 400850 | $(\text{NH}_4)_2(\text{TiO})_2(\text{As}_{0.4}\text{P}_{0.57}\text{O}_4)_2$ | 150.57 | tunnel  | 5.15 | 3.16 | T | 7.11  |



|        |                                                  |        |         |      |      |   |       |
|--------|--------------------------------------------------|--------|---------|------|------|---|-------|
| 409484 | $\text{NH}_4(\text{Ag}(\text{CO}_3))$            | 159.46 | layered | 4.50 | 2.37 | T | 14.94 |
| 409582 | $(\text{NH}_4)_3\text{Bi}_2(\text{PO}_4)_3$      | 114.32 | tunnel  | 4.91 | 3.57 | T | 10.32 |
| 411501 | $(\text{NH}_4)_3(\text{BSb}_4\text{O}_{13})$     | 113.67 | tunnel  | 5.22 | 1.78 | F | 7.28  |
| 412877 | $\text{BaNH}_4(\text{FeO}_3)$                    | 111.16 | tunnel  | 3.57 | 2.45 | F | 15.07 |
| 417892 | $(\text{NH}_4)_2\text{Mn}(\text{V}_2\text{O}_7)$ | 199.17 | layered | 4.46 | 2.47 | F | 13.97 |

---

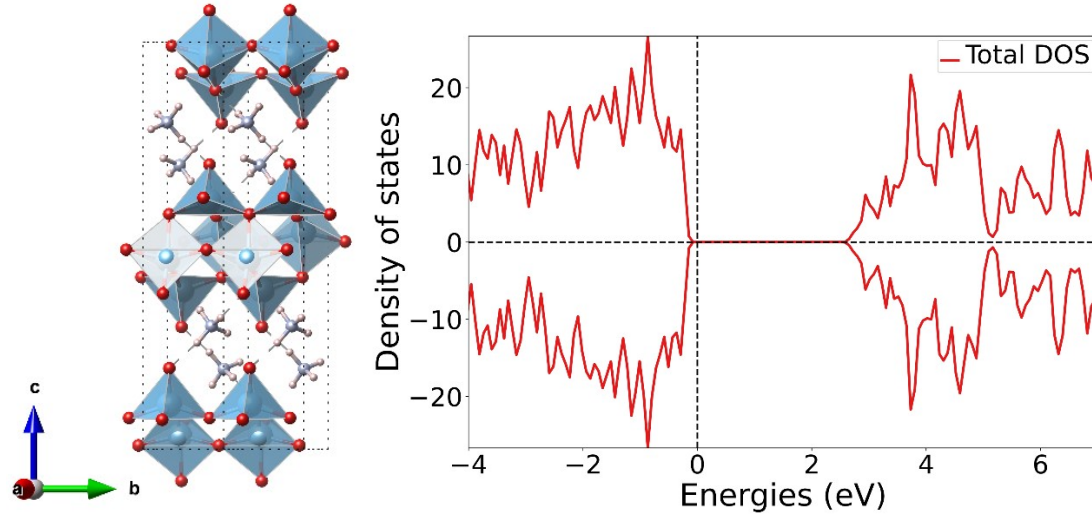

**Figure S1.** Structure diagram and density of states of  $\text{NH}_4\text{TiNbO}_5$ .

**Table S7.** Cell parameters of  $\text{NH}_4\text{TiNbO}_5$ , ICSD is the ICSD Collection Code, STRU is the chemical formula. The  $a$ ,  $b$ ,  $c$  ( $\text{\AA}$ ) and  $\alpha$ ,  $\beta$ ,  $\gamma$  ( $^\circ$ ) are unit cell parameters.  $V$  ( $\text{\AA}^3$ ) is the cell volume and Structure parameters of  $\text{NH}_4\text{TiNbO}_5$ .

| ICSD  | STRU                        | $a$  | $b$  | $c$   | $\alpha$ | $\beta$ | $\gamma$ | $V$    |
|-------|-----------------------------|------|------|-------|----------|---------|----------|--------|
| 16557 | $\text{NH}_4\text{TiNbO}_5$ | 6.61 | 3.83 | 19.09 | 90.00    | 90.00   | 90.02    | 483.36 |

| NO. | E   | x       | y       | z       | NO. | E   | x       | y       | z       |
|-----|-----|---------|---------|---------|-----|-----|---------|---------|---------|
| 1   | N1  | 0.30208 | 0.24233 | 0.69764 | 29  | O9  | 0.96053 | 0.23745 | 0.38226 |
| 2   | N2  | 0.80208 | 0.24233 | 0.80236 | 30  | O10 | 0.46053 | 0.23745 | 0.11774 |
| 3   | N3  | 0.69824 | 0.75816 | 0.30237 | 31  | O11 | 0.03969 | 0.76299 | 0.61776 |
| 4   | N4  | 0.19824 | 0.75816 | 0.19763 | 32  | O12 | 0.53969 | 0.76299 | 0.88224 |
| 5   | Ti1 | 0.80623 | 0.24853 | 0.46647 | 33  | O13 | 0.32882 | 0.27457 | 0.30079 |
| 6   | Ti2 | 0.30623 | 0.24853 | 0.03353 | 34  | O14 | 0.82882 | 0.27457 | 0.19921 |
| 7   | Ti3 | 0.19399 | 0.75190 | 0.53354 | 35  | O15 | 0.67138 | 0.72582 | 0.69922 |
| 8   | Ti4 | 0.69399 | 0.75190 | 0.96646 | 36  | O16 | 0.17138 | 0.72582 | 0.80078 |
| 9   | Ti5 | 0.26111 | 0.25663 | 0.39052 | 37  | O17 | 0.74260 | 0.24695 | 0.57731 |
| 10  | Ti6 | 0.76111 | 0.25663 | 0.10948 | 38  | O18 | 0.24260 | 0.24695 | 0.92269 |
| 11  | Ti7 | 0.73912 | 0.74382 | 0.60950 | 39  | O19 | 0.25762 | 0.75345 | 0.42271 |
| 12  | Ti8 | 0.23912 | 0.74382 | 0.89050 | 40  | O20 | 0.75762 | 0.75345 | 0.07729 |
| 13  | Nb1 | 0.80623 | 0.24853 | 0.46647 | 41  | H1  | 0.18661 | 0.08956 | 0.67668 |
| 14  | Nb2 | 0.30623 | 0.24853 | 0.03353 | 42  | H2  | 0.41517 | 0.07617 | 0.71441 |
| 15  | Nb3 | 0.19399 | 0.75190 | 0.53354 | 43  | H3  | 0.24983 | 0.40402 | 0.73850 |
| 16  | Nb4 | 0.69399 | 0.75190 | 0.96646 | 44  | H4  | 0.35986 | 0.40041 | 0.65870 |
| 17  | Nb5 | 0.26111 | 0.25663 | 0.39052 | 45  | H5  | 0.68661 | 0.08956 | 0.82332 |
| 18  | Nb6 | 0.76111 | 0.25663 | 0.10948 | 46  | H6  | 0.91517 | 0.07617 | 0.78559 |
| 19  | Nb7 | 0.73912 | 0.74382 | 0.60950 | 47  | H7  | 0.85986 | 0.40041 | 0.84130 |
| 20  | Nb8 | 0.23912 | 0.74382 | 0.89050 | 48  | H8  | 0.74983 | 0.40402 | 0.76150 |
| 21  | O1  | 0.55729 | 0.25651 | 0.42713 | 49  | H9  | 0.64046 | 0.60002 | 0.34130 |
| 22  | O2  | 0.05729 | 0.25651 | 0.07287 | 50  | H10 | 0.75048 | 0.59650 | 0.26150 |
| 23  | O3  | 0.44293 | 0.74383 | 0.57288 | 51  | H11 | 0.81370 | 0.91090 | 0.32334 |

|    |    |         |         |         |    |     |         |         |         |
|----|----|---------|---------|---------|----|-----|---------|---------|---------|
| 24 | O4 | 0.94293 | 0.74383 | 0.92712 | 52 | H12 | 0.58516 | 0.92431 | 0.28560 |
| 25 | O5 | 0.14580 | 0.25270 | 0.50988 | 53 | H13 | 0.14046 | 0.60002 | 0.15870 |
| 26 | O6 | 0.64580 | 0.25270 | 0.99012 | 54 | H14 | 0.25048 | 0.59650 | 0.23850 |
| 27 | O7 | 0.85441 | 0.74776 | 0.49015 | 55 | H15 | 0.08516 | 0.92431 | 0.21440 |
| 28 | O8 | 0.35441 | 0.74776 | 0.00985 | 56 | H16 | 0.31370 | 0.91090 | 0.17666 |

---

---

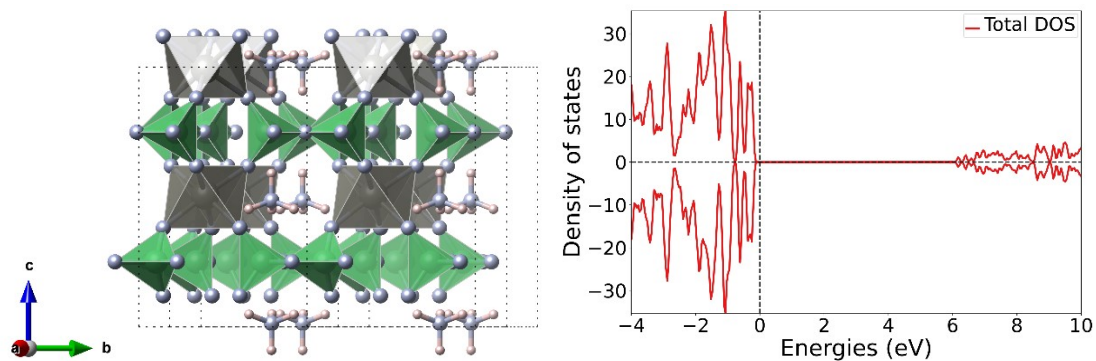

**Figure S2.** Structure diagram and density of states of  $\text{NH}_4\text{Zn}(\text{BeF}_3)_3$ .

**Table S8.** Cell parameters of  $\text{NH}_4\text{Zn}(\text{BeF}_3)_3$ , ICSD is the ICSD Collection Code, STRU is the chemical formula. The  $a$ ,  $b$ ,  $c$  (Å) and  $\alpha$ ,  $\beta$ ,  $\gamma$  (°) are unit cell parameters.  $V$  (Å<sup>3</sup>) is the cell volume and Structure parameters of  $\text{NH}_4\text{Zn}(\text{BeF}_3)_3$ .

| ICSD  | STRU                                   | $a$  | $b$  | $c$  | $\alpha$ | $\beta$ | $\gamma$ | $V$    |
|-------|----------------------------------------|------|------|------|----------|---------|----------|--------|
| 18022 | $\text{NH}_4\text{Zn}(\text{BeF}_3)_3$ | 6.78 | 6.78 | 9.80 | 90.00    | 90.00   | 120.01   | 390.72 |

| NO. | E   | x       | y       | z       | NO. | E   | x       | y       | z       |
|-----|-----|---------|---------|---------|-----|-----|---------|---------|---------|
| 1   | Be1 | 0.79019 | 0.06537 | 0.25000 | 19  | F1  | 0.76030 | 0.81577 | 0.25000 |
| 2   | Be2 | 0.27505 | 0.20985 | 0.25000 | 20  | F2  | 0.05531 | 0.23972 | 0.25000 |
| 3   | Be3 | 0.93460 | 0.72508 | 0.25000 | 21  | F3  | 0.18423 | 0.94478 | 0.25000 |
| 4   | Be4 | 0.27450 | 0.06312 | 0.75000 | 22  | F4  | 0.05418 | 0.81451 | 0.75000 |
| 5   | Be5 | 0.93693 | 0.21132 | 0.75000 | 23  | F5  | 0.18555 | 0.23968 | 0.75000 |
| 6   | Be6 | 0.78860 | 0.72553 | 0.75000 | 24  | F6  | 0.76041 | 0.94583 | 0.75000 |
| 7   | Zn1 | 0.66670 | 0.33337 | 0.99320 | 25  | F7  | 0.67210 | 0.08632 | 0.11910 |
| 8   | Zn2 | 0.66670 | 0.33337 | 0.50680 | 26  | F8  | 0.41419 | 0.32798 | 0.11912 |
| 9   | H1  | 0.46263 | 0.82302 | 0.04696 | 27  | F9  | 0.91374 | 0.58591 | 0.11918 |
| 10  | H2  | 0.36053 | 0.53745 | 0.04736 | 28  | F10 | 0.67210 | 0.08632 | 0.38090 |
| 11  | H3  | 0.33109 | 0.66570 | 0.90935 | 29  | F11 | 0.41419 | 0.32798 | 0.38088 |
| 12  | H4  | 0.17701 | 0.63952 | 0.04844 | 30  | F12 | 0.91374 | 0.58591 | 0.38082 |
| 13  | H5  | 0.46263 | 0.82302 | 0.45304 | 31  | F13 | 0.41222 | 0.08440 | 0.61900 |
| 14  | H6  | 0.36053 | 0.53745 | 0.45264 | 32  | F14 | 0.91567 | 0.32782 | 0.61901 |
| 15  | H7  | 0.17701 | 0.63952 | 0.45156 | 33  | F15 | 0.67222 | 0.58781 | 0.61898 |
| 16  | H8  | 0.33109 | 0.66570 | 0.59065 | 34  | F16 | 0.41222 | 0.08440 | 0.88100 |
| 17  | N1  | 0.33291 | 0.66646 | 0.01351 | 35  | F17 | 0.91567 | 0.32782 | 0.88099 |
| 18  | N2  | 0.33291 | 0.66646 | 0.48649 | 36  | F18 | 0.67222 | 0.58781 | 0.88102 |

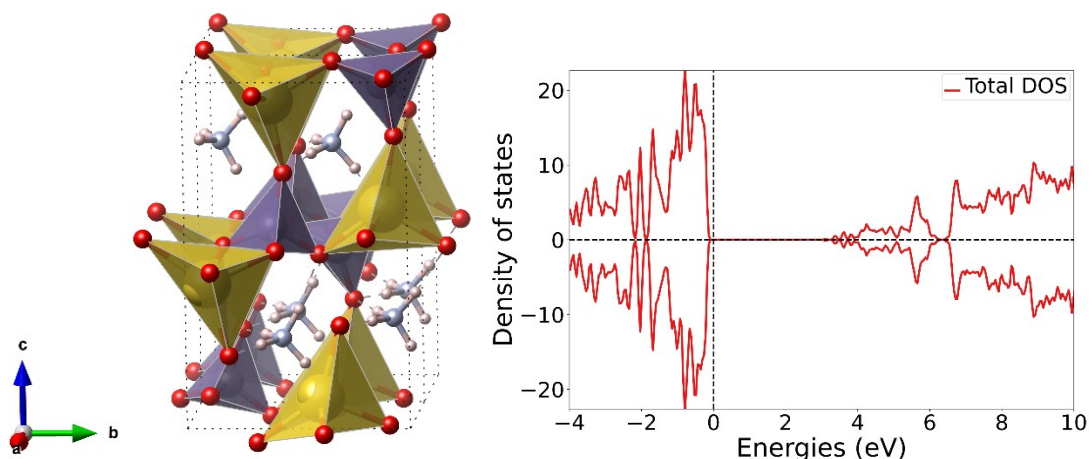

**Figure S3.** Structure diagram and density of states of  $\text{NaNH}_4\text{GeO}_3$ .

**Table S9.** Cell parameters of  $\text{NaNH}_4\text{GeO}_3$ , ICSD is the ICSD Collection Code, STRU is the chemical formula. The  $a$ ,  $b$ ,  $c$  (Å) and  $\alpha$ ,  $\beta$ ,  $\gamma$  ( $^\circ$ ) are unit cell parameters.  $V$  (Å<sup>3</sup>) is the cell volume and Structure parameters of  $\text{NaNH}_4\text{GeO}_3$ .

| ICSD  | STRU                        | $a$  | $b$  | $c$   | $\alpha$ | $\beta$ | $\gamma$ | $V$    |
|-------|-----------------------------|------|------|-------|----------|---------|----------|--------|
| 30910 | $\text{NaNH}_4\text{GeO}_3$ | 4.88 | 7.04 | 11.04 | 90.00    | 90.00   | 89.93    | 378.93 |

| NO. | E   | x       | y       | z       | NO. | E   | x       | y       | z       |
|-----|-----|---------|---------|---------|-----|-----|---------|---------|---------|
| 1   | Na1 | 0.46265 | 0.35562 | 0.90607 | 21  | H13 | 0.99727 | 0.67425 | 0.82726 |
| 2   | Na2 | 0.96408 | 0.59725 | 0.08467 | 22  | H14 | 0.96584 | 0.70528 | 0.67164 |
| 3   | Na3 | 0.96405 | 0.09726 | 0.41515 | 23  | H15 | 0.79967 | 0.52459 | 0.74149 |
| 4   | Na4 | 0.46263 | 0.85559 | 0.59373 | 24  | H16 | 0.15971 | 0.52251 | 0.73019 |
| 5   | Ge1 | 0.50560 | 0.36454 | 0.54310 | 25  | N1  | 0.98012 | 0.10530 | 0.75376 |
| 6   | Ge2 | 0.00171 | 0.62253 | 0.44316 | 26  | N2  | 0.46701 | 0.90064 | 0.27907 |
| 7   | Ge3 | 0.00173 | 0.12256 | 0.05666 | 27  | N3  | 0.46707 | 0.40063 | 0.22074 |
| 8   | Ge4 | 0.50564 | 0.86455 | 0.95670 | 28  | N4  | 0.98006 | 0.60532 | 0.74606 |
| 9   | H1  | 0.96589 | 0.20527 | 0.82817 | 29  | O1  | 0.86685 | 0.39887 | 0.50029 |
| 10  | H2  | 0.99730 | 0.17423 | 0.67256 | 30  | O2  | 0.36895 | 0.56485 | 0.45479 |
| 11  | H3  | 0.79974 | 0.02456 | 0.75834 | 31  | O3  | 0.36897 | 0.06488 | 0.04499 |
| 12  | H4  | 0.15978 | 0.02250 | 0.76963 | 32  | O4  | 0.86688 | 0.89890 | 0.99955 |
| 13  | H5  | 0.46250 | 0.99874 | 0.35121 | 33  | O5  | 0.46532 | 0.41335 | 0.69696 |
| 14  | H6  | 0.46180 | 0.97475 | 0.19753 | 34  | O6  | 0.94863 | 0.68931 | 0.29291 |
| 15  | H7  | 0.28894 | 0.81661 | 0.28194 | 35  | O7  | 0.94876 | 0.18937 | 0.20692 |
| 16  | H8  | 0.64930 | 0.81583 | 0.28418 | 36  | O8  | 0.46539 | 0.91332 | 0.80283 |
| 17  | H9  | 0.46184 | 0.47474 | 0.30228 | 37  | O9  | 0.42957 | 0.14106 | 0.48355 |
| 18  | H10 | 0.46256 | 0.49873 | 0.14860 | 38  | O10 | 0.94313 | 0.81117 | 0.54429 |
| 19  | H11 | 0.28900 | 0.31659 | 0.21786 | 39  | O11 | 0.94312 | 0.31119 | 0.95552 |
| 20  | H12 | 0.64939 | 0.31585 | 0.21564 | 40  | O12 | 0.42954 | 0.64107 | 0.01626 |

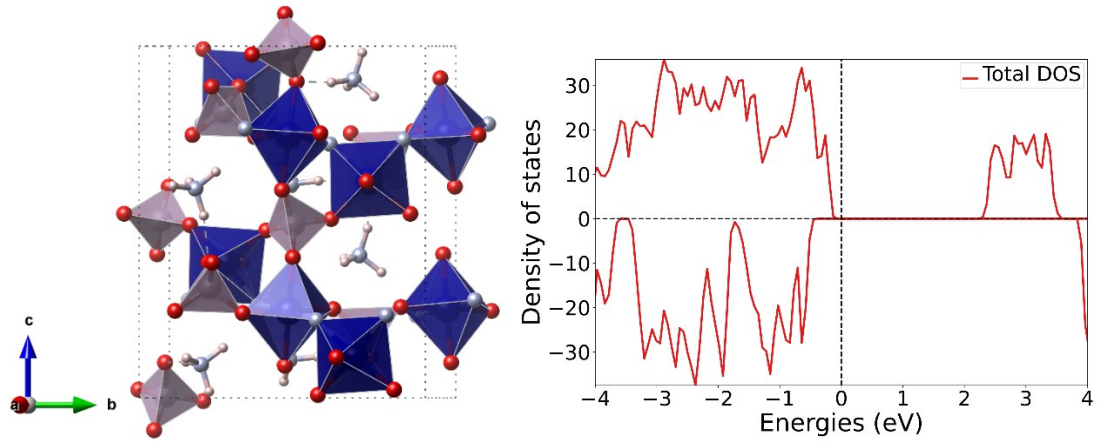

**Figure S4.** Structure diagram and density of states of  $\text{NH}_4\text{CrPO}_4\text{F}$ .

**Table S10.** Cell parameters of  $\text{NH}_4\text{CrPO}_4\text{F}$ , ICSD is the ICSD Collection Code, STRU is the chemical formula. The  $a$ ,  $b$ ,  $c$  (Å) and  $\alpha$ ,  $\beta$ ,  $\gamma$  ( $^\circ$ ) are unit cell parameters.  $V$  (Å<sup>3</sup>) is the cell volume and Structure parameters of  $\text{NH}_4\text{CrPO}_4\text{F}$ .

| ICSD  | STRU                               | $a$  | $b$   | $c$   | $\alpha$ | $\beta$ | $\gamma$ | $V$    |
|-------|------------------------------------|------|-------|-------|----------|---------|----------|--------|
| 39440 | $\text{NH}_4\text{CrPO}_4\text{F}$ | 6.49 | 10.76 | 13.04 | 90.00    | 90.00   | 90.00    | 910.87 |

| NO. | E   | x       | y       | z       | NO. | E   | x       | y       | z       |
|-----|-----|---------|---------|---------|-----|-----|---------|---------|---------|
| 1   | Cr1 | 0.25006 | 0.99612 | 0.75326 | 49  | N1  | 0.21788 | 0.45025 | 0.60856 |
| 2   | Cr2 | 0.75024 | 0.49612 | 0.24673 | 50  | N2  | 0.78234 | 0.95025 | 0.39144 |
| 3   | Cr3 | 0.75006 | 0.49612 | 0.74674 | 51  | N3  | 0.71788 | 0.95025 | 0.89144 |
| 4   | Cr4 | 0.25024 | 0.99612 | 0.25327 | 52  | N4  | 0.28234 | 0.45025 | 0.10856 |
| 5   | Cr5 | 0.01005 | 0.25040 | 0.88300 | 53  | N5  | 0.84354 | 0.18032 | 0.59487 |
| 6   | Cr6 | 0.99027 | 0.75040 | 0.11700 | 54  | N6  | 0.15669 | 0.68033 | 0.40514 |
| 7   | Cr7 | 0.51005 | 0.75040 | 0.61700 | 55  | N7  | 0.34354 | 0.68032 | 0.90513 |
| 8   | Cr8 | 0.49027 | 0.25040 | 0.38300 | 56  | N8  | 0.65669 | 0.18033 | 0.09486 |
| 9   | P1  | 0.50176 | 0.24658 | 0.81487 | 57  | O1  | 0.46326 | 0.12950 | 0.74761 |
| 10  | P2  | 0.49855 | 0.74659 | 0.18511 | 58  | O2  | 0.53700 | 0.62950 | 0.25237 |
| 11  | P3  | 0.00176 | 0.74658 | 0.68513 | 59  | O3  | 0.96326 | 0.62950 | 0.75239 |
| 12  | P4  | 0.99855 | 0.24659 | 0.31489 | 60  | O4  | 0.03700 | 0.12950 | 0.24763 |
| 13  | P5  | 0.33231 | 0.00400 | 0.50612 | 61  | O5  | 0.54634 | 0.35692 | 0.74138 |
| 14  | P6  | 0.66794 | 0.50400 | 0.49389 | 62  | O6  | 0.45408 | 0.85696 | 0.25857 |
| 15  | P7  | 0.83231 | 0.50400 | 0.99388 | 63  | O7  | 0.04634 | 0.85692 | 0.75862 |
| 16  | P8  | 0.16794 | 0.00400 | 0.00611 | 64  | O8  | 0.95408 | 0.35696 | 0.24143 |
| 17  | H1  | 0.06170 | 0.43630 | 0.59683 | 65  | O9  | 0.69546 | 0.22143 | 0.88483 |
| 18  | H2  | 0.30900 | 0.41991 | 0.54720 | 66  | O10 | 0.30482 | 0.72145 | 0.11516 |
| 19  | H3  | 0.27301 | 0.40760 | 0.67363 | 67  | O11 | 0.19546 | 0.72143 | 0.61517 |
| 20  | H4  | 0.23543 | 0.54528 | 0.61722 | 68  | O12 | 0.80482 | 0.22145 | 0.38484 |
| 21  | H5  | 0.72719 | 0.90762 | 0.32636 | 69  | O13 | 0.31531 | 0.27537 | 0.88461 |
| 22  | H6  | 0.93853 | 0.93630 | 0.40316 | 70  | O14 | 0.68501 | 0.77533 | 0.11535 |
| 23  | H7  | 0.69123 | 0.91992 | 0.45279 | 71  | O15 | 0.81531 | 0.77537 | 0.61539 |
| 24  | H8  | 0.76481 | 0.04529 | 0.38279 | 72  | O16 | 0.18501 | 0.27533 | 0.38465 |

|    |     |         |         |         |    |     |         |         |         |
|----|-----|---------|---------|---------|----|-----|---------|---------|---------|
| 25 | H9  | 0.56170 | 0.93630 | 0.90317 | 73 | O17 | 0.20133 | 0.97813 | 0.40841 |
| 26 | H10 | 0.80900 | 0.91991 | 0.95280 | 74 | O18 | 0.79894 | 0.47814 | 0.59158 |
| 27 | H11 | 0.73543 | 0.04528 | 0.88278 | 75 | O19 | 0.70133 | 0.47813 | 0.09159 |
| 28 | H12 | 0.77301 | 0.90760 | 0.82637 | 76 | O20 | 0.29894 | 0.97814 | 0.90842 |
| 29 | H13 | 0.22719 | 0.40762 | 0.17364 | 77 | O21 | 0.18892 | 0.01741 | 0.60080 |
| 30 | H14 | 0.43853 | 0.43630 | 0.09684 | 78 | O22 | 0.81132 | 0.51740 | 0.39920 |
| 31 | H15 | 0.26481 | 0.54529 | 0.11721 | 79 | O23 | 0.68892 | 0.51741 | 0.89920 |
| 32 | H16 | 0.19123 | 0.41992 | 0.04721 | 80 | O24 | 0.31132 | 0.01740 | 0.10080 |
| 33 | H17 | 0.70124 | 0.14415 | 0.61355 | 81 | O25 | 0.48225 | 0.89287 | 0.52374 |
| 34 | H18 | 0.96092 | 0.11484 | 0.60316 | 82 | O26 | 0.51797 | 0.39288 | 0.47626 |
| 35 | H19 | 0.87113 | 0.25418 | 0.64267 | 83 | O27 | 0.98225 | 0.39287 | 0.97626 |
| 36 | H20 | 0.83823 | 0.20900 | 0.51823 | 84 | O28 | 0.01797 | 0.89288 | 0.02374 |
| 37 | H21 | 0.03928 | 0.61486 | 0.39685 | 85 | O29 | 0.46714 | 0.12151 | 0.49131 |
| 38 | H22 | 0.29897 | 0.64415 | 0.38645 | 86 | O30 | 0.53312 | 0.62152 | 0.50868 |
| 39 | H23 | 0.16201 | 0.70900 | 0.48178 | 87 | O31 | 0.96714 | 0.62151 | 0.00869 |
| 40 | H24 | 0.12910 | 0.75420 | 0.35735 | 88 | O32 | 0.03312 | 0.12152 | 0.99132 |
| 41 | H25 | 0.20124 | 0.64415 | 0.88645 | 89 | F1  | 0.46739 | 0.86727 | 0.73443 |
| 42 | H26 | 0.46092 | 0.61484 | 0.89684 | 90 | F2  | 0.53293 | 0.36725 | 0.26555 |
| 43 | H27 | 0.33823 | 0.70900 | 0.98177 | 91 | F3  | 0.96739 | 0.36727 | 0.76557 |
| 44 | H28 | 0.37113 | 0.75418 | 0.85733 | 92 | F4  | 0.03293 | 0.86725 | 0.23445 |
| 45 | H29 | 0.53928 | 0.11486 | 0.10315 | 93 | F5  | 0.02944 | 0.11679 | 0.77858 |
| 46 | H30 | 0.79897 | 0.14415 | 0.11355 | 94 | F6  | 0.97084 | 0.61681 | 0.22144 |
| 47 | H31 | 0.62910 | 0.25420 | 0.14265 | 95 | F7  | 0.52944 | 0.61679 | 0.72142 |
| 48 | H32 | 0.66201 | 0.20900 | 0.01822 | 96 | F8  | 0.47084 | 0.11681 | 0.27856 |

---

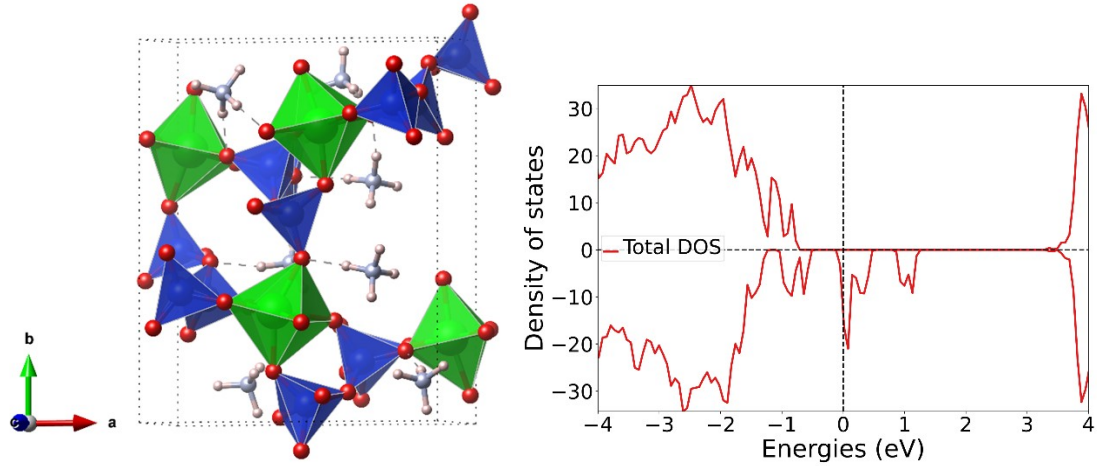

**Figure S5.** Structure diagram and density of states of  $(\text{NH}_4)_2(\text{Zr}_{0.86}\text{Ti}_{0.14})(\text{Si}_3\text{O}_9)$ .

**Table S11.** Cell parameters of  $(\text{NH}_4)_2(\text{Zr}_{0.86}\text{Ti}_{0.14})(\text{Si}_3\text{O}_9)$ , ICSD is the ICSD Collection Code, STRU is the chemical formula. The  $a$ ,  $b$ ,  $c$  (Å) and  $\alpha$ ,  $\beta$ ,  $\gamma$  (°) are unit cell parameters.  $V$  (Å<sup>3</sup>) is the cell volume and Structure parameters of  $(\text{NH}_4)_2(\text{Zr}_{0.86}\text{Ti}_{0.14})(\text{Si}_3\text{O}_9)$ .

| ICSD  | STRU                                                                                           | $a$   | $b$   | $c$  | $\alpha$ | $\beta$ | $\gamma$ | $V$     |
|-------|------------------------------------------------------------------------------------------------|-------|-------|------|----------|---------|----------|---------|
| 39697 | $(\text{NH}_4)_2(\text{Zr}_{0.86}\text{Ti}_{0.14})(\text{Si}_3\text{O}_9)(\text{H}_2\text{O})$ | 10.64 | 13.47 | 7.40 | 89.10    | 90.62   | 89.63    | 1060.22 |

| NO. | E   | x       | y       | z       | NO. | E   | x        | y       | z       |
|-----|-----|---------|---------|---------|-----|-----|----------|---------|---------|
| 1   | N1  | 0.92187 | 0.10656 | 0.77000 | 51  | O23 | 0.41990  | 0.13388 | 0.76343 |
| 2   | N2  | 0.58267 | 0.89650 | 0.24043 | 52  | O24 | 0.08656  | 0.87664 | 0.23232 |
| 3   | N3  | 0.40411 | 0.42107 | 0.20802 | 53  | O25 | 0.91097  | 0.86044 | 0.76225 |
| 4   | N4  | 0.04119 | 0.61057 | 0.76556 | 54  | O26 | 0.60201  | 0.13488 | 0.26574 |
| 5   | N5  | 0.76654 | 0.39194 | 0.86370 | 55  | O27 | 0.41759  | 0.64843 | 0.22178 |
| 6   | N6  | 0.69661 | 0.63234 | 0.31662 | 56  | O28 | 0.09192  | 0.36274 | 0.69318 |
| 7   | N7  | 0.26301 | 0.10476 | 0.21000 | 57  | O29 | 0.86618  | 0.93098 | 0.08277 |
| 8   | N8  | 0.24157 | 0.86200 | 0.68792 | 58  | O30 | 0.64867  | 0.07952 | 0.60756 |
| 9   | Zr1 | 0.94341 | 0.22316 | 0.22761 | 59  | O31 | 0.37770  | 0.56332 | 0.91149 |
| 10  | Zr2 | 0.57268 | 0.77350 | 0.73629 | 60  | O32 | 0.15496  | 0.42354 | 0.36051 |
| 11  | Zr3 | 0.42219 | 0.29102 | 0.76664 | 61  | O33 | 0.89837  | 0.93829 | 0.43785 |
| 12  | Zr4 | 0.07419 | 0.71686 | 0.25317 | 62  | O34 | 0.60801  | 0.06687 | 0.94256 |
| 13  | Ti1 | 0.94341 | 0.22316 | 0.22761 | 63  | O35 | 0.39845  | 0.56510 | 0.54445 |
| 14  | Ti2 | 0.57268 | 0.77350 | 0.73629 | 64  | O36 | 0.09454  | 0.44251 | 0.01248 |
| 15  | Ti3 | 0.42219 | 0.29102 | 0.76664 | 65  | O37 | 0.85319  | 0.58720 | 0.03909 |
| 16  | Ti4 | 0.07419 | 0.71686 | 0.25317 | 66  | O38 | 0.61809  | 0.34324 | 0.41870 |
| 17  | Si1 | 0.84867 | 0.83101 | 0.96057 | 67  | O39 | 0.28673  | 0.89831 | 0.20320 |
| 18  | Si2 | 0.67572 | 0.16020 | 0.45227 | 68  | O40 | 0.41669  | 0.01513 | 0.56005 |
| 19  | Si3 | 0.34927 | 0.66880 | 0.02029 | 69  | H1  | 0.84964  | 0.12306 | 0.85888 |
| 20  | Si4 | 0.16118 | 0.32684 | 0.50392 | 70  | H2  | 0.93429  | 0.03091 | 0.76603 |
| 21  | Si5 | 0.86999 | 0.83378 | 0.55101 | 71  | H3  | -0.00165 | 0.14399 | 0.82459 |



|    |      |         |         |         |     |     |         |         |         |
|----|------|---------|---------|---------|-----|-----|---------|---------|---------|
| 22 | Si6  | 0.63503 | 0.16894 | 0.05277 | 72  | H4  | 0.89853 | 0.13437 | 0.64095 |
| 23 | Si7  | 0.37070 | 0.67102 | 0.43178 | 73  | H5  | 0.49148 | 0.87380 | 0.25931 |
| 24 | Si8  | 0.12733 | 0.33804 | 0.90822 | 74  | H6  | 0.63521 | 0.87281 | 0.35372 |
| 25 | Si9  | 0.96972 | 0.95843 | 0.24263 | 75  | H7  | 0.58567 | 0.97258 | 0.22552 |
| 26 | Si10 | 0.53050 | 0.04663 | 0.74287 | 76  | H8  | 0.61944 | 0.86456 | 0.12333 |
| 27 | Si11 | 0.47475 | 0.54422 | 0.73872 | 77  | H9  | 0.31273 | 0.41135 | 0.25354 |
| 28 | Si12 | 0.03692 | 0.45411 | 0.21863 | 78  | H10 | 0.44193 | 0.35540 | 0.16201 |
| 29 | O1   | 0.82031 | 0.18785 | 0.44019 | 79  | H11 | 0.45529 | 0.44672 | 0.31579 |
| 30 | O2   | 0.70084 | 0.80471 | 0.94217 | 80  | H12 | 0.40137 | 0.47255 | 0.10129 |
| 31 | O3   | 0.30953 | 0.30395 | 0.54386 | 81  | H13 | 0.96503 | 0.59753 | 0.85100 |
| 32 | O4   | 0.19916 | 0.68490 | 0.04317 | 82  | H14 | 0.07327 | 0.54441 | 0.71630 |
| 33 | O5   | 0.00868 | 0.07283 | 0.21594 | 83  | H15 | 0.11024 | 0.64050 | 0.85087 |
| 34 | O6   | 0.51376 | 0.92596 | 0.76705 | 84  | H16 | 0.01597 | 0.65946 | 0.65959 |
| 35 | O7   | 0.51418 | 0.42744 | 0.75459 | 85  | H17 | 0.67249 | 0.40705 | 0.82315 |
| 36 | O8   | 0.00490 | 0.57018 | 0.25734 | 86  | H18 | 0.77184 | 0.32409 | 0.93785 |
| 37 | O9   | 0.78174 | 0.20416 | 0.04553 | 87  | H19 | 0.80013 | 0.44861 | 0.94305 |
| 38 | O10  | 0.72089 | 0.80453 | 0.54164 | 88  | H20 | 0.82275 | 0.38644 | 0.75253 |
| 39 | O11  | 0.27758 | 0.31396 | 0.92923 | 89  | H21 | 0.60626 | 0.63897 | 0.26412 |
| 40 | O12  | 0.22210 | 0.69931 | 0.43532 | 90  | H22 | 0.69933 | 0.57356 | 0.40609 |
| 41 | O13  | 0.92960 | 0.74086 | 0.05749 | 91  | H23 | 0.71654 | 0.69624 | 0.39096 |
| 42 | O14  | 0.59464 | 0.26690 | 0.53460 | 92  | H24 | 0.76238 | 0.61973 | 0.21038 |
| 43 | O15  | 0.41619 | 0.75812 | 0.90956 | 93  | H25 | 0.16353 | 0.10159 | 0.21799 |
| 44 | O16  | 0.08773 | 0.23538 | 0.41363 | 94  | H26 | 0.29197 | 0.03070 | 0.19370 |
| 45 | O17  | 0.95897 | 0.74461 | 0.47836 | 95  | H27 | 0.29837 | 0.13214 | 0.32862 |
| 46 | O18  | 0.54192 | 0.25893 | 0.98632 | 96  | H28 | 0.28837 | 0.14992 | 0.10351 |
| 47 | O19  | 0.45793 | 0.75849 | 0.51164 | 97  | H29 | 0.15719 | 0.88265 | 0.74159 |
| 48 | O20  | 0.04575 | 0.24632 | 0.98765 | 98  | H30 | 0.22623 | 0.80999 | 0.58640 |
| 49 | O21  | 0.92200 | 0.37659 | 0.24106 | 99  | H31 | 0.30013 | 0.82797 | 0.78769 |
| 50 | O22  | 0.59230 | 0.62061 | 0.74938 | 100 | H32 | 0.29078 | 0.92251 | 0.63488 |

---

---

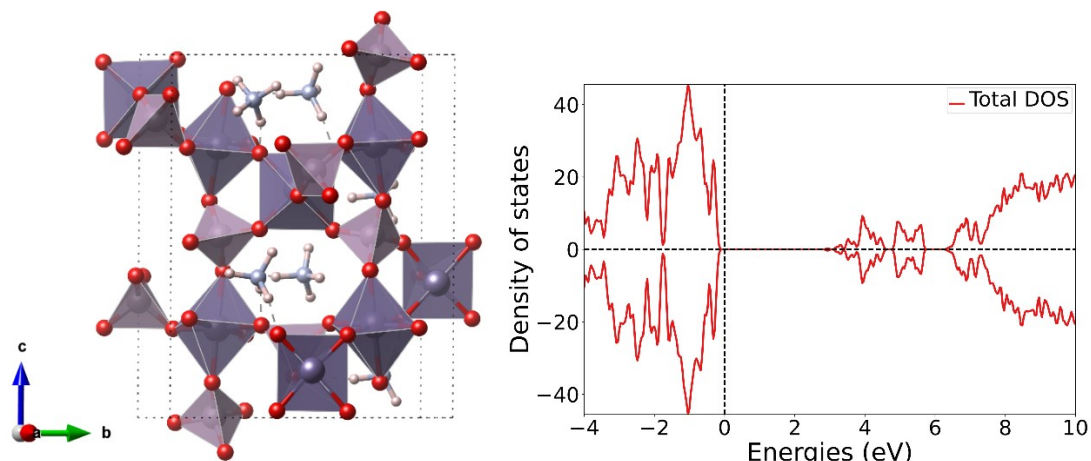

**Figure S6.** Structure diagram and density of states of  $\text{NH}_4\text{GeOPO}_4$ .

**Table S12.** Cell parameters of  $\text{NH}_4\text{GeOPO}_4$ , ICSD is the ICSD Collection Code, STRU is the chemical formula. The  $a$ ,  $b$ ,  $c$  (Å) and  $\alpha$ ,  $\beta$ ,  $\gamma$  ( $^\circ$ ) are unit cell parameters.  $V$  (Å<sup>3</sup>) is the cell volume and Structure parameters of  $\text{NH}_4\text{GeOPO}_4$ .

| ICSD  | STRU                        | $a$  | $b$   | $c$   | $\alpha$ | $\beta$ | $\gamma$ | $V$    |
|-------|-----------------------------|------|-------|-------|----------|---------|----------|--------|
| 39735 | $\text{NH}_4\text{GeOPO}_4$ | 6.55 | 10.15 | 12.84 | 89.70    | 89.80   | 89.89    | 853.99 |

| NO. | E   | x       | y       | z       | NO. | E   | x       | y       | z       |
|-----|-----|---------|---------|---------|-----|-----|---------|---------|---------|
| 1   | Ge1 | 0.00338 | 0.00157 | 0.87098 | 49  | N1  | 0.71965 | 0.32167 | 0.87550 |
| 2   | Ge2 | 0.98982 | 0.50051 | 0.13028 | 50  | N2  | 0.28764 | 0.83275 | 0.11558 |
| 3   | Ge3 | 0.50533 | 0.50112 | 0.62882 | 51  | N3  | 0.20949 | 0.83211 | 0.61413 |
| 4   | Ge4 | 0.48815 | 0.99846 | 0.37100 | 52  | N4  | 0.78845 | 0.33319 | 0.38579 |
| 5   | Ge5 | 0.24382 | 0.25181 | 0.74802 | 53  | N5  | 0.82274 | 0.07399 | 0.60526 |
| 6   | Ge6 | 0.75327 | 0.74861 | 0.25656 | 54  | N6  | 0.18623 | 0.56449 | 0.39278 |
| 7   | Ge7 | 0.74218 | 0.75050 | 0.75245 | 55  | N7  | 0.32283 | 0.56416 | 0.89613 |
| 8   | Ge8 | 0.25296 | 0.24933 | 0.24613 | 56  | N8  | 0.68474 | 0.06306 | 0.10689 |
| 9   | P1  | 0.16088 | 0.25125 | 0.00245 | 57  | O1  | 0.01930 | 0.13043 | 0.98635 |
| 10  | P2  | 0.83606 | 0.75104 | 0.99852 | 58  | O2  | 0.98004 | 0.63030 | 0.01642 |
| 11  | P3  | 0.66240 | 0.75067 | 0.50028 | 59  | O3  | 0.51889 | 0.62964 | 0.51635 |
| 12  | P4  | 0.33594 | 0.25027 | 0.50113 | 60  | O4  | 0.47695 | 0.12888 | 0.48349 |
| 13  | P5  | 0.99546 | 0.50541 | 0.68064 | 61  | O5  | 0.02425 | 0.37602 | 0.01929 |
| 14  | P6  | 0.00203 | 0.00201 | 0.32108 | 62  | O6  | 0.97418 | 0.87401 | 0.97881 |
| 15  | P7  | 0.49140 | 0.00164 | 0.82062 | 63  | O7  | 0.52522 | 0.87445 | 0.48174 |
| 16  | P8  | 0.50438 | 0.50313 | 0.18174 | 64  | O8  | 0.47254 | 0.37343 | 0.51970 |
| 17  | H1  | 0.62522 | 0.35785 | 0.81456 | 65  | O9  | 0.29698 | 0.27654 | 0.90492 |
| 18  | H2  | 0.62446 | 0.27569 | 0.92731 | 66  | O10 | 0.70526 | 0.77613 | 0.09726 |
| 19  | H3  | 0.80371 | 0.39173 | 0.91335 | 67  | O11 | 0.79388 | 0.77348 | 0.59797 |
| 20  | H4  | 0.82064 | 0.25419 | 0.84352 | 68  | O12 | 0.20327 | 0.27605 | 0.40326 |
| 21  | H5  | 0.30762 | 0.87865 | 0.04484 | 69  | O13 | 0.30270 | 0.22834 | 0.09714 |
| 22  | H6  | 0.14691 | 0.85748 | 0.14640 | 70  | O14 | 0.69595 | 0.72751 | 0.90358 |
| 23  | H7  | 0.39901 | 0.85727 | 0.17174 | 71  | O15 | 0.80461 | 0.72729 | 0.40531 |
| 24  | H8  | 0.29192 | 0.73169 | 0.10628 | 72  | O16 | 0.19299 | 0.22696 | 0.59680 |

|    |     |         |         |         |    |     |         |         |         |
|----|-----|---------|---------|---------|----|-----|---------|---------|---------|
| 25 | H9  | 0.18579 | 0.87658 | 0.54317 | 73 | O17 | 0.45165 | 0.37461 | 0.72757 |
| 26 | H10 | 0.09838 | 0.85641 | 0.67060 | 74 | O18 | 0.54746 | 0.87362 | 0.27223 |
| 27 | H11 | 0.34985 | 0.85921 | 0.64332 | 75 | O19 | 0.94102 | 0.88310 | 0.76675 |
| 28 | H12 | 0.20815 | 0.73086 | 0.60585 | 76 | O20 | 0.04825 | 0.37474 | 0.22898 |
| 29 | H13 | 0.89947 | 0.35720 | 0.32855 | 77 | O21 | 0.53622 | 0.63022 | 0.72712 |
| 30 | H14 | 0.64737 | 0.35746 | 0.35541 | 78 | O22 | 0.45775 | 0.12832 | 0.27268 |
| 31 | H15 | 0.80906 | 0.38019 | 0.45555 | 79 | O23 | 0.03004 | 0.13883 | 0.77913 |
| 32 | H16 | 0.79272 | 0.23250 | 0.39705 | 80 | O24 | 0.96071 | 0.63075 | 0.22786 |
| 33 | H17 | 0.80974 | 0.04102 | 0.52937 | 81 | O25 | 0.18269 | 0.54130 | 0.61165 |
| 34 | H18 | 0.68550 | 0.11381 | 0.62807 | 82 | O26 | 0.81340 | 0.03581 | 0.38918 |
| 35 | H19 | 0.93865 | 0.14264 | 0.60910 | 83 | O27 | 0.67732 | 0.03369 | 0.88938 |
| 36 | H20 | 0.85871 | 0.99854 | 0.65709 | 84 | O28 | 0.31702 | 0.53960 | 0.11455 |
| 37 | H21 | 0.08940 | 0.59816 | 0.33235 | 85 | O29 | 0.80724 | 0.47127 | 0.61172 |
| 38 | H22 | 0.13381 | 0.58546 | 0.46635 | 86 | O30 | 0.18976 | 0.96871 | 0.39074 |
| 39 | H23 | 0.33020 | 0.60307 | 0.38489 | 87 | O31 | 0.30106 | 0.96977 | 0.88914 |
| 40 | H24 | 0.19977 | 0.46328 | 0.38806 | 88 | O32 | 0.69359 | 0.47222 | 0.11267 |
| 41 | H25 | 0.40406 | 0.59888 | 0.82984 | 89 | O33 | 0.94974 | 0.62105 | 0.75649 |
| 42 | H26 | 0.17841 | 0.60306 | 0.90279 | 90 | O34 | 0.04699 | 0.11796 | 0.24505 |
| 43 | H27 | 0.39839 | 0.58423 | 0.96390 | 91 | O35 | 0.44634 | 0.11785 | 0.74399 |
| 44 | H28 | 0.30814 | 0.46309 | 0.89143 | 92 | O36 | 0.54980 | 0.61650 | 0.25965 |
| 45 | H29 | 0.63236 | 0.07982 | 0.03252 | 93 | O37 | 0.04599 | 0.38824 | 0.75389 |
| 46 | H30 | 0.58693 | 0.09738 | 0.16657 | 94 | O38 | 0.95543 | 0.88475 | 0.24738 |
| 47 | H31 | 0.82749 | 0.10389 | 0.11227 | 95 | O39 | 0.53658 | 0.88435 | 0.74635 |
| 48 | H32 | 0.70145 | 0.96224 | 0.11469 | 96 | O40 | 0.45712 | 0.38337 | 0.25426 |

---

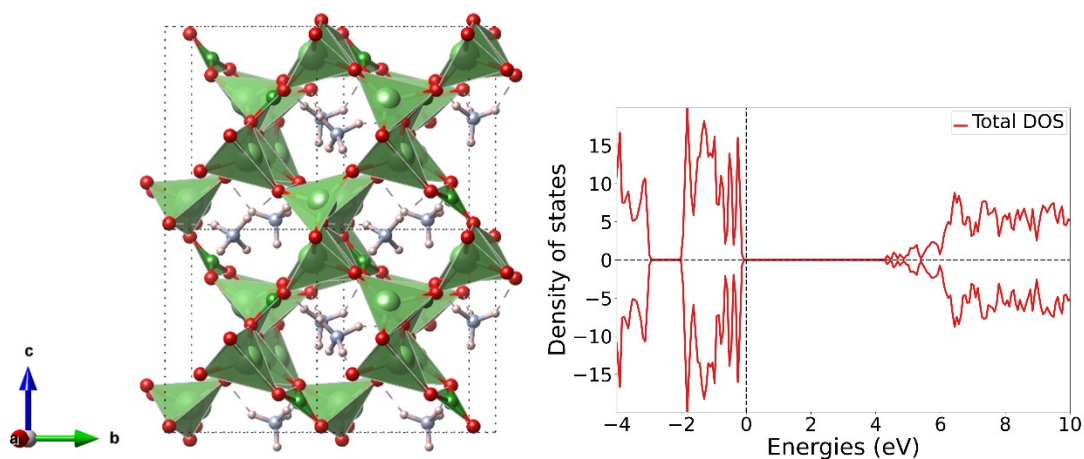

**Figure S7.** Structure diagram and density of states of  $\text{NH}_4\text{Li}_2(\text{BO}_3)$ .

**Table S13.** Cell parameters of  $\text{NH}_4\text{Li}_2(\text{BO}_3)$ , ICSD is the ICSD Collection Code, STRU is the chemical formula. The  $a$ ,  $b$ ,  $c$  (Å) and  $\alpha$ ,  $\beta$ ,  $\gamma$  ( $^\circ$ ) are unit cell parameters.  $V$  (Å<sup>3</sup>) is the cell volume and Structure parameters of  $\text{NH}_4\text{Li}_2(\text{BO}_3)$ .

| ICSD  | STRU                                  | $a$  | $b$  | $c$  | $\alpha$ | $\beta$ | $\gamma$ | $V$    |
|-------|---------------------------------------|------|------|------|----------|---------|----------|--------|
| 48177 | $\text{NH}_4\text{Li}_2(\text{BO}_3)$ | 6.44 | 6.50 | 8.52 | 90.00    | 90.12   | 90.00    | 356.73 |

| NO. | E   | x       | y       | z       | NO. | E   | x       | y       | z       |
|-----|-----|---------|---------|---------|-----|-----|---------|---------|---------|
| 1   | Li1 | 0.52244 | 0.54924 | 0.35661 | 23  | H11 | 0.38025 | 0.69281 | 0.10734 |
| 2   | Li2 | 0.94312 | 0.96318 | 0.85587 | 24  | H12 | 0.29784 | 0.45045 | 0.08605 |
| 3   | Li3 | 0.02600 | 0.46290 | 0.62901 | 25  | H13 | 0.29010 | 0.88715 | 0.42732 |
| 4   | Li4 | 0.44408 | 0.06378 | 0.13156 | 26  | H14 | 0.12113 | 0.84839 | 0.58224 |
| 5   | Li5 | 0.44408 | 0.43622 | 0.63156 | 27  | H15 | 0.29784 | 0.04955 | 0.58605 |
| 6   | Li6 | 0.02600 | 0.03710 | 0.12901 | 28  | H16 | 0.38025 | 0.80719 | 0.60734 |
| 7   | Li7 | 0.94312 | 0.53682 | 0.35587 | 29  | N1  | 0.76985 | 0.40831 | 0.96934 |
| 8   | Li8 | 0.52244 | 0.95076 | 0.85661 | 30  | N2  | 0.76985 | 0.09169 | 0.46934 |
| 9   | B1  | 0.72757 | 0.83350 | 0.14961 | 31  | N3  | 0.26958 | 0.59922 | 0.04599 |
| 10  | B2  | 0.72757 | 0.66650 | 0.64961 | 32  | N4  | 0.26958 | 0.90078 | 0.54599 |
| 11  | B3  | 0.23646 | 0.17197 | 0.83810 | 33  | O1  | 0.73105 | 0.98118 | 0.02935 |
| 12  | B4  | 0.23646 | 0.32803 | 0.33810 | 34  | O2  | 0.73105 | 0.51882 | 0.52935 |
| 13  | H1  | 0.65975 | 0.47834 | 0.89957 | 35  | O3  | 0.23109 | 0.03040 | 0.96253 |
| 14  | H2  | 0.70957 | 0.27740 | 0.02089 | 36  | O4  | 0.23109 | 0.46960 | 0.46253 |
| 15  | H3  | 0.82231 | 0.51097 | 0.05385 | 37  | O5  | 0.91016 | 0.73169 | 0.18787 |
| 16  | H4  | 0.89920 | 0.34847 | 0.89313 | 38  | O6  | 0.54221 | 0.69884 | 0.73029 |
| 17  | H5  | 0.65975 | 0.02166 | 0.39957 | 39  | O7  | 0.42013 | 0.20336 | 0.75895 |
| 18  | H6  | 0.70957 | 0.22260 | 0.52089 | 40  | O8  | 0.04922 | 0.24194 | 0.28704 |
| 19  | H7  | 0.89920 | 0.15153 | 0.39313 | 41  | O9  | 0.04922 | 0.25806 | 0.78704 |
| 20  | H8  | 0.82231 | 0.98903 | 0.55385 | 42  | O10 | 0.42013 | 0.29664 | 0.25895 |
| 21  | H9  | 0.29010 | 0.61285 | 0.92732 | 43  | O11 | 0.54221 | 0.80116 | 0.23029 |
| 22  | H10 | 0.12113 | 0.65161 | 0.08224 | 44  | O12 | 0.91016 | 0.76831 | 0.68787 |

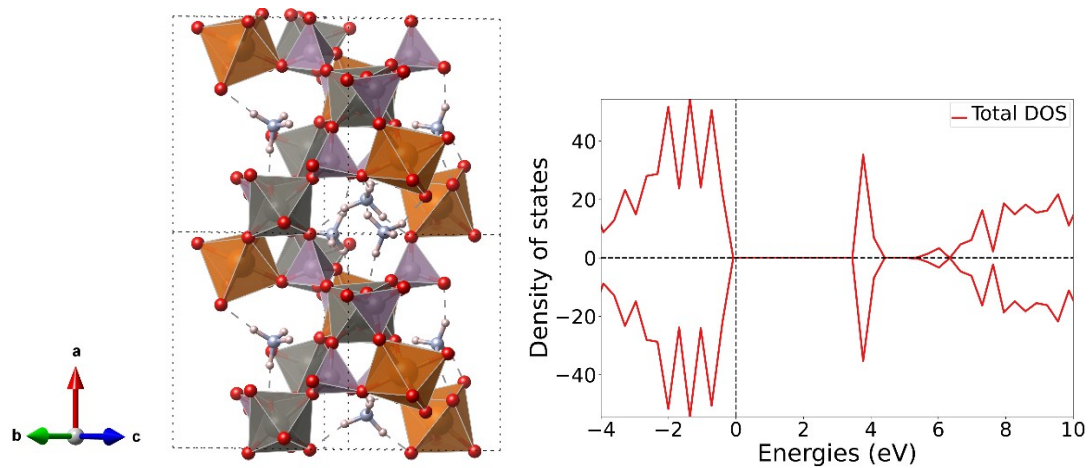

**Figure S8.** Structure diagram and density of states of  $(\text{NH}_4)_2\text{MgWO}_2(\text{PO}_4)_2$ .

**Table S14.** Cell parameters of  $(\text{NH}_4)_2\text{MgWO}_2(\text{PO}_4)_2$ , ICSD is the ICSD Collection Code, STRU is the chemical formula. The  $a$ ,  $b$ ,  $c$  (Å) and  $\alpha$ ,  $\beta$ ,  $\gamma$  ( $^\circ$ ) are unit cell parameters.  $V$  (Å<sup>3</sup>) is the cell volume and Structure parameters of  $(\text{NH}_4)_2\text{MgWO}_2(\text{PO}_4)_2$ .

| ICSD  | STRU                                                | a    | b    | c     | $\alpha$ | $\beta$ | $\gamma$ | V      |
|-------|-----------------------------------------------------|------|------|-------|----------|---------|----------|--------|
| 59281 | $(\text{NH}_4)_2\text{MgWO}_2$<br>$(\text{PO}_4)_2$ | 9.43 | 9.45 | 10.87 | 89.66    | 90.53   | 89.80    | 968.91 |

| NO. | E   | x       | y       | z       | NO. | E   | x       | y       | z       |
|-----|-----|---------|---------|---------|-----|-----|---------|---------|---------|
| 1   | Mg1 | 0.36009 | 0.62672 | 0.99342 | 49  | N1  | 0.00900 | 0.70002 | 0.94590 |
| 2   | Mg2 | 0.64796 | 0.35857 | 0.50083 | 50  | N2  | 0.99395 | 0.34349 | 0.34235 |
| 3   | Mg3 | 0.13405 | 0.12551 | 0.75897 | 51  | N3  | 0.15917 | 0.50200 | 0.67301 |
| 4   | Mg4 | 0.85732 | 0.84376 | 0.25294 | 52  | N4  | 0.73319 | 0.47632 | 0.06836 |
| 5   | P1  | 0.67240 | 0.81535 | 0.99411 | 53  | N5  | 0.49198 | 0.18824 | 0.80449 |
| 6   | P2  | 0.32203 | 0.17857 | 0.50524 | 54  | N6  | 0.49520 | 0.78984 | 0.39379 |
| 7   | P3  | 0.32884 | 0.81490 | 0.73569 | 55  | N7  | 0.34024 | 0.00409 | 0.08343 |
| 8   | P4  | 0.66514 | 0.15614 | 0.25470 | 56  | N8  | 0.72167 | 0.00244 | 0.55937 |
| 9   | P5  | 0.82484 | 0.31472 | 0.76503 | 57  | O1  | 0.77305 | 0.23436 | 0.88404 |
| 10  | P6  | 0.17210 | 0.68008 | 0.24518 | 58  | O2  | 0.21289 | 0.77813 | 0.35679 |
| 11  | P7  | 0.16834 | 0.31340 | 0.01560 | 59  | O3  | 0.75497 | 0.71043 | 0.62707 |
| 12  | P8  | 0.83595 | 0.66153 | 0.50761 | 60  | O4  | 0.24386 | 0.28331 | 0.14240 |
| 13  | H1  | 0.08649 | 0.75320 | 0.89763 | 61  | O5  | 0.72491 | 0.73515 | 0.87571 |
| 14  | H2  | 0.04834 | 0.59661 | 0.95683 | 62  | O6  | 0.27959 | 0.27557 | 0.39186 |
| 15  | H3  | 0.91127 | 0.70533 | 0.90116 | 63  | O7  | 0.75190 | 0.19925 | 0.13720 |
| 16  | H4  | 0.99909 | 0.74177 | 0.03266 | 64  | O8  | 0.25639 | 0.78280 | 0.60883 |
| 17  | H5  | 0.09333 | 0.30628 | 0.36967 | 65  | O9  | 0.71396 | 0.97592 | 0.97166 |
| 18  | H6  | 0.91696 | 0.26535 | 0.33907 | 66  | O10 | 0.26713 | 0.02619 | 0.46515 |
| 19  | H7  | 0.00475 | 0.38927 | 0.25748 | 67  | O11 | 0.49141 | 0.77441 | 0.71236 |
| 20  | H8  | 0.95233 | 0.41851 | 0.40350 | 68  | O12 | 0.50725 | 0.21302 | 0.22749 |
| 21  | H9  | 0.22866 | 0.43079 | 0.63405 | 69  | O13 | 0.78297 | 0.47581 | 0.79086 |
| 22  | H10 | 0.07910 | 0.43700 | 0.70964 | 70  | O14 | 0.23240 | 0.52827 | 0.28606 |
| 23  | H11 | 0.11710 | 0.57165 | 0.60880 | 71  | O15 | 0.00801 | 0.26766 | 0.04023 |

|    |     |         |         |         |    |     |         |         |         |
|----|-----|---------|---------|---------|----|-----|---------|---------|---------|
| 24 | H12 | 0.20812 | 0.56110 | 0.74130 | 72 | O16 | 0.99617 | 0.71139 | 0.53032 |
| 25 | H13 | 0.75624 | 0.46958 | 0.97615 | 73 | O17 | 0.23058 | 0.21558 | 0.91684 |
| 26 | H14 | 0.76801 | 0.38388 | 0.11101 | 74 | O18 | 0.77399 | 0.73904 | 0.39682 |
| 27 | H15 | 0.62305 | 0.48009 | 0.07838 | 75 | O19 | 0.74131 | 0.26187 | 0.65362 |
| 28 | H16 | 0.77161 | 0.57142 | 0.10321 | 76 | O20 | 0.25165 | 0.72845 | 0.13065 |
| 29 | H17 | 0.58905 | 0.18831 | 0.85015 | 77 | O21 | 0.26908 | 0.71521 | 0.83466 |
| 30 | H18 | 0.44719 | 0.08709 | 0.79528 | 78 | O22 | 0.72751 | 0.23516 | 0.36502 |
| 31 | H19 | 0.50582 | 0.22768 | 0.71689 | 79 | O23 | 0.75461 | 0.75820 | 0.10572 |
| 32 | H20 | 0.41655 | 0.24652 | 0.85064 | 80 | O24 | 0.24224 | 0.22743 | 0.61903 |
| 33 | H21 | 0.55056 | 0.87168 | 0.35038 | 81 | O25 | 0.17772 | 0.46996 | 0.98173 |
| 34 | H22 | 0.54083 | 0.69523 | 0.36921 | 82 | O26 | 0.83243 | 0.50038 | 0.49759 |
| 35 | H23 | 0.38617 | 0.79107 | 0.37248 | 83 | O27 | 0.98467 | 0.30025 | 0.75300 |
| 36 | H24 | 0.50501 | 0.79731 | 0.48755 | 84 | O28 | 0.01200 | 0.67558 | 0.22874 |
| 37 | H25 | 0.41899 | 0.93572 | 0.04861 | 85 | O29 | 0.31461 | 0.97038 | 0.76971 |
| 38 | H26 | 0.26678 | 0.93652 | 0.12142 | 86 | O30 | 0.66450 | 0.99564 | 0.27083 |
| 39 | H27 | 0.29459 | 0.06538 | 0.01385 | 87 | O31 | 0.51220 | 0.80050 | 0.00414 |
| 40 | H28 | 0.38264 | 0.07153 | 0.14809 | 88 | O32 | 0.48295 | 0.17845 | 0.52280 |
| 41 | H29 | 0.76135 | 0.08564 | 0.61216 | 89 | O33 | 0.99521 | 0.03604 | 0.88605 |
| 42 | H30 | 0.72379 | 0.90598 | 0.60534 | 90 | O34 | 0.97791 | 0.95015 | 0.38727 |
| 43 | H31 | 0.78135 | 0.99376 | 0.48088 | 91 | O35 | 0.55740 | 0.49416 | 0.62591 |
| 44 | H32 | 0.61984 | 0.03654 | 0.53585 | 92 | O36 | 0.44801 | 0.48920 | 0.12392 |
| 45 | W1  | 0.88402 | 0.09775 | 0.00734 | 93 | O37 | 0.50356 | 0.54102 | 0.86763 |
| 46 | W2  | 0.10872 | 0.89135 | 0.49832 | 94 | O38 | 0.51418 | 0.45194 | 0.36765 |
| 47 | W3  | 0.61708 | 0.60647 | 0.74823 | 95 | O39 | 0.94728 | 0.98142 | 0.12682 |
| 48 | W4  | 0.38718 | 0.38907 | 0.25622 | 96 | O40 | 0.04850 | 0.99150 | 0.62715 |

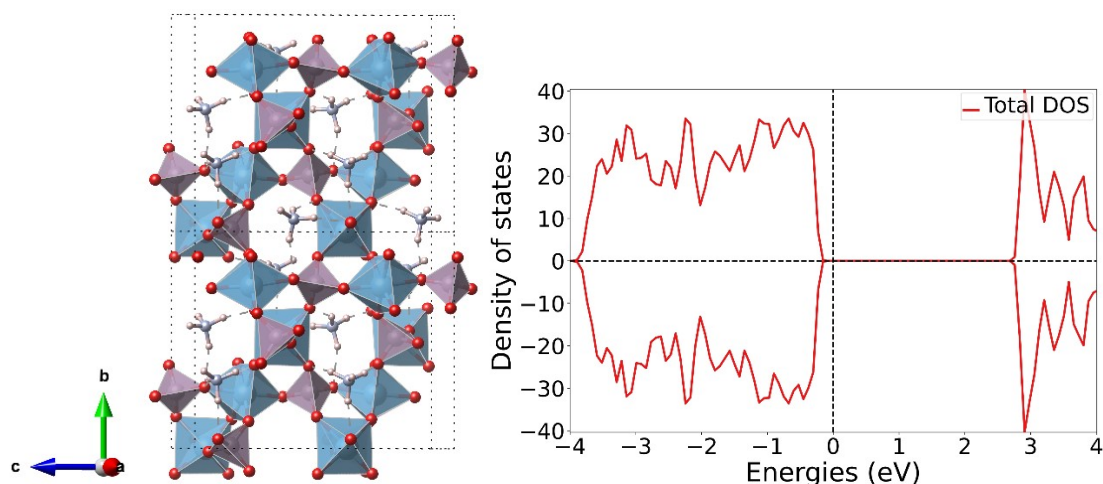

**Figure S9.** Structure diagram and density of states of  $\text{NH}_4(\text{TiO})(\text{PO}_4)$ .

**Table S15.** Cell parameters of  $\text{NH}_4(\text{TiO})(\text{PO}_4)$ , ICSD is the ICSD Collection Code, STRU is the chemical formula. The  $a$ ,  $b$ ,  $c$  (Å) and  $\alpha$ ,  $\beta$ ,  $\gamma$  (°) are unit cell parameters.  $V$  (Å<sup>3</sup>) is the cell volume and Structure parameters of  $\text{NH}_4(\text{TiO})(\text{PO}_4)$ .

| ICSD  | STRU                                   | $a$  | $b$   | $c$   | $\alpha$ | $\beta$ | $\gamma$ | $V$    |
|-------|----------------------------------------|------|-------|-------|----------|---------|----------|--------|
| 59285 | $\text{NH}_4(\text{TiO})(\text{PO}_4)$ | 6.58 | 10.71 | 13.05 | 89.85    | 90.06   | 89.97    | 919.61 |

| NO. | E   | x       | y       | z       | NO. | E   | x       | y       | z       |
|-----|-----|---------|---------|---------|-----|-----|---------|---------|---------|
| 1   | Ti1 | 0.00210 | 0.00112 | 0.86879 | 49  | N1  | 0.70356 | 0.31413 | 0.88884 |
| 2   | Ti2 | 0.00436 | 0.50401 | 0.12939 | 50  | N2  | 0.28600 | 0.82535 | 0.12151 |
| 3   | Ti3 | 0.49692 | 0.50364 | 0.62921 | 51  | N3  | 0.21457 | 0.82539 | 0.62087 |
| 4   | Ti4 | 0.49911 | 0.00144 | 0.36899 | 52  | N4  | 0.79125 | 0.31435 | 0.38780 |
| 5   | Ti5 | 0.23146 | 0.25172 | 0.73924 | 53  | N5  | 0.81171 | 0.05787 | 0.60083 |
| 6   | Ti6 | 0.76652 | 0.74921 | 0.25798 | 54  | N6  | 0.18947 | 0.56301 | 0.39727 |
| 7   | Ti7 | 0.73441 | 0.74896 | 0.75791 | 55  | N7  | 0.31203 | 0.56274 | 0.89705 |
| 8   | Ti8 | 0.26861 | 0.25153 | 0.23960 | 56  | N8  | 0.68830 | 0.05852 | 0.10016 |
| 9   | P1  | 0.15682 | 0.25936 | 0.99617 | 57  | O1  | 0.94671 | 0.88372 | 0.77649 |
| 10  | P2  | 0.84490 | 0.75960 | 0.00210 | 58  | O2  | 0.06209 | 0.38570 | 0.21969 |
| 11  | P3  | 0.65665 | 0.75956 | 0.50209 | 59  | O3  | 0.44049 | 0.38527 | 0.71953 |
| 12  | P4  | 0.34268 | 0.25941 | 0.49593 | 60  | O4  | 0.55471 | 0.88397 | 0.27663 |
| 13  | P5  | 0.98992 | 0.51052 | 0.68076 | 61  | O5  | 0.03806 | 0.13518 | 0.77243 |
| 14  | P6  | 0.00760 | 0.01109 | 0.31620 | 62  | O6  | 0.96637 | 0.63700 | 0.22593 |
| 15  | P7  | 0.49363 | 0.01098 | 0.81592 | 63  | O7  | 0.53499 | 0.63682 | 0.72581 |
| 16  | P8  | 0.51201 | 0.51053 | 0.18079 | 64  | O8  | 0.46322 | 0.13531 | 0.27258 |
| 17  | H1  | 0.74476 | 0.35174 | 0.81942 | 65  | O9  | 0.01537 | 0.14627 | 0.98364 |
| 18  | H2  | 0.54757 | 0.32124 | 0.89996 | 66  | O10 | 0.99097 | 0.64802 | 0.01371 |
| 19  | H3  | 0.79124 | 0.35510 | 0.94586 | 67  | O11 | 0.51083 | 0.64801 | 0.51350 |
| 20  | H4  | 0.73594 | 0.21948 | 0.88672 | 68  | O12 | 0.48438 | 0.14632 | 0.48369 |
| 21  | H5  | 0.28696 | 0.86832 | 0.05115 | 69  | O13 | 0.03020 | 0.38082 | 0.01271 |
| 22  | H6  | 0.15291 | 0.84955 | 0.15991 | 70  | O14 | 0.96733 | 0.88229 | 0.98464 |
| 23  | H7  | 0.40717 | 0.85177 | 0.16826 | 71  | O15 | 0.53439 | 0.88243 | 0.48466 |
| 24  | H8  | 0.29101 | 0.72950 | 0.11203 | 72  | O16 | 0.46884 | 0.38091 | 0.51288 |

|    |     |         |         |         |    |     |         |         |         |
|----|-----|---------|---------|---------|----|-----|---------|---------|---------|
| 25 | H9  | 0.21268 | 0.86860 | 0.55059 | 73 | O17 | 0.28694 | 0.28155 | 0.89787 |
| 26 | H10 | 0.09342 | 0.85135 | 0.66768 | 74 | O18 | 0.71614 | 0.77935 | 0.10060 |
| 27 | H11 | 0.34767 | 0.84983 | 0.65927 | 75 | O19 | 0.78537 | 0.77912 | 0.60071 |
| 28 | H12 | 0.21028 | 0.72954 | 0.61126 | 76 | O20 | 0.21342 | 0.28186 | 0.39724 |
| 29 | H13 | 0.72370 | 0.34818 | 0.32186 | 77 | O21 | 0.30070 | 0.23828 | 0.08995 |
| 30 | H14 | 0.71524 | 0.35362 | 0.44943 | 78 | O22 | 0.70249 | 0.73780 | 0.90751 |
| 31 | H15 | 0.94665 | 0.32885 | 0.38888 | 79 | O23 | 0.79908 | 0.73782 | 0.40757 |
| 32 | H16 | 0.77038 | 0.21839 | 0.38938 | 80 | O24 | 0.19893 | 0.23834 | 0.58968 |
| 33 | H17 | 0.88045 | 0.06418 | 0.52999 | 81 | O25 | 0.17869 | 0.54397 | 0.61461 |
| 34 | H18 | 0.67133 | 0.10060 | 0.59274 | 82 | O26 | 0.81887 | 0.04214 | 0.38293 |
| 35 | H19 | 0.89837 | 0.09726 | 0.65954 | 83 | O27 | 0.68297 | 0.04161 | 0.88241 |
| 36 | H20 | 0.78702 | 0.96420 | 0.61606 | 84 | O28 | 0.32281 | 0.54341 | 0.11464 |
| 37 | H21 | 0.10829 | 0.60242 | 0.33639 | 85 | O29 | 0.80015 | 0.48671 | 0.61303 |
| 38 | H22 | 0.10875 | 0.56517 | 0.46482 | 86 | O30 | 0.19613 | 0.98363 | 0.38445 |
| 39 | H23 | 0.32599 | 0.60811 | 0.41280 | 87 | O31 | 0.30555 | 0.98387 | 0.88445 |
| 40 | H24 | 0.22221 | 0.47093 | 0.38081 | 88 | O32 | 0.70157 | 0.48712 | 0.11309 |
| 41 | H25 | 0.39268 | 0.60226 | 0.83616 | 89 | O33 | 0.94853 | 0.62211 | 0.75455 |
| 42 | H26 | 0.17549 | 0.60777 | 0.91267 | 90 | O34 | 0.05124 | 0.12418 | 0.24427 |
| 43 | H27 | 0.39322 | 0.56491 | 0.96451 | 91 | O35 | 0.44977 | 0.12419 | 0.74413 |
| 44 | H28 | 0.27950 | 0.47066 | 0.88047 | 92 | O36 | 0.55262 | 0.62235 | 0.25448 |
| 45 | H29 | 0.61587 | 0.06450 | 0.03024 | 93 | O37 | 0.03003 | 0.39215 | 0.74665 |
| 46 | H30 | 0.60396 | 0.09788 | 0.15964 | 94 | O38 | 0.96382 | 0.89487 | 0.24860 |
| 47 | H31 | 0.82808 | 0.10148 | 0.09006 | 95 | O39 | 0.53673 | 0.89465 | 0.74829 |
| 48 | H32 | 0.71434 | 0.96492 | 0.11524 | 96 | O40 | 0.47333 | 0.39196 | 0.24681 |

---



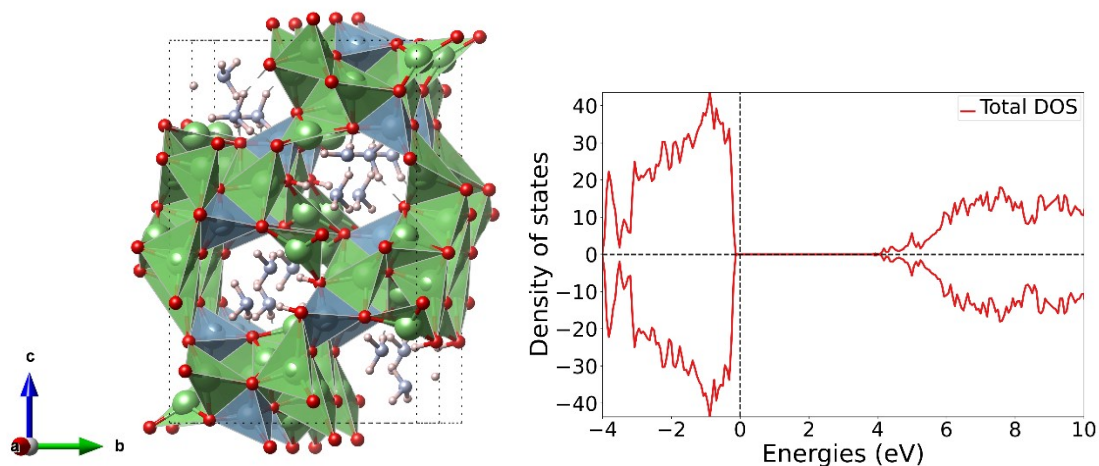

**Figure S10.** Structure diagram and density of states of  $\text{NH}_4\text{Li}_4(\text{AlO}_4)$ .

**Table S16.** Cell parameters of  $\text{NH}_4\text{Li}_4(\text{AlO}_4)$ , ICSD is the ICSD Collection Code, STRU is the chemical formula. The  $a$ ,  $b$ ,  $c$  (Å) and  $\alpha$ ,  $\beta$ ,  $\gamma$  ( $^\circ$ ) are unit cell parameters.  $V$  (Å<sup>3</sup>) is the cell volume and Structure parameters of  $\text{NH}_4\text{Li}_4(\text{AlO}_4)$ .

| ICSD  | STRU                                   | $a$  | $b$   | $c$   | $\alpha$ | $\beta$ | $\gamma$ | $V$    |
|-------|----------------------------------------|------|-------|-------|----------|---------|----------|--------|
| 65260 | $\text{NH}_4\text{Li}_4(\text{AlO}_4)$ | 5.60 | 10.66 | 16.47 | 90.01    | 90.00   | 100.22   | 968.35 |

| NO. | E    | x       | y       | z       | NO. | E   | x        | y       | z       |
|-----|------|---------|---------|---------|-----|-----|----------|---------|---------|
| 1   | Li1  | 0.32346 | 0.22544 | 0.61889 | 57  | H17 | 0.17925  | 0.78758 | 0.22039 |
| 2   | Li2  | 0.18713 | 0.26915 | 0.11623 | 58  | H18 | 0.30264  | 0.74581 | 0.13690 |
| 3   | Li3  | 0.68726 | 0.76894 | 0.38381 | 59  | H19 | 0.45581  | 0.75252 | 0.22268 |
| 4   | Li4  | 0.82376 | 0.72536 | 0.88115 | 60  | H20 | 0.48294  | 0.94640 | 0.19664 |
| 5   | Li5  | 0.11908 | 0.41486 | 0.01649 | 61  | H21 | 0.96714  | 0.72666 | 0.71976 |
| 6   | Li6  | 0.38441 | 0.07533 | 0.52358 | 62  | H22 | 0.18237  | 0.77067 | 0.64109 |
| 7   | Li7  | 0.88466 | 0.57541 | 0.97653 | 63  | H23 | 0.19321  | 0.64422 | 0.70354 |
| 8   | Li8  | 0.61902 | 0.91503 | 0.48336 | 64  | H24 | 0.26265  | 0.80447 | 0.73716 |
| 9   | Li9  | 0.17339 | 0.03160 | 0.74874 | 65  | H25 | 0.46658  | 0.22667 | 0.78031 |
| 10  | Li10 | 0.34637 | 0.45495 | 0.24698 | 66  | H26 | 0.76231  | 0.30422 | 0.76296 |
| 11  | Li11 | 0.84667 | 0.95433 | 0.25280 | 67  | H27 | 0.69230  | 0.14395 | 0.79651 |
| 12  | Li12 | 0.67344 | 0.53136 | 0.75157 | 68  | H28 | 0.68192  | 0.27044 | 0.85899 |
| 13  | Li13 | 0.78007 | 0.13084 | 0.11775 | 69  | H29 | 0.67515  | 0.28843 | 0.28024 |
| 14  | Li14 | 0.72575 | 0.36346 | 0.62276 | 70  | H30 | -0.04984 | 0.25175 | 0.27699 |
| 15  | Li15 | 0.22599 | 0.86345 | 0.87745 | 71  | H31 | 0.79952  | 0.24543 | 0.36322 |
| 16  | Li16 | 0.27954 | 0.63061 | 0.38244 | 72  | H32 | 0.98233  | 0.44603 | 0.30347 |
| 17  | Li17 | 0.51678 | 0.45560 | 0.91734 | 73  | N1  | 0.63606  | 0.64197 | 0.59440 |
| 18  | Li18 | 0.98232 | 0.04285 | 0.42091 | 74  | N2  | 0.85610  | 0.84855 | 0.09386 |
| 19  | Li19 | 0.48239 | 0.54264 | 0.07901 | 75  | N3  | 0.35205  | 0.34895 | 0.40565 |
| 20  | Li20 | 0.01650 | 0.95566 | 0.58281 | 76  | N4  | 0.13599  | 0.14142 | 0.90620 |
| 21  | Li21 | 0.34904 | 0.01012 | 0.04778 | 77  | N5  | 0.34180  | 0.79785 | 0.18946 |
| 22  | Li22 | 0.14496 | 0.47754 | 0.54903 | 78  | N6  | 0.14827  | 0.73291 | 0.69944 |
| 23  | Li23 | 0.64516 | 0.97713 | 0.95119 | 79  | N7  | 0.64775  | 0.23273 | 0.80063 |
| 24  | Li24 | 0.84759 | 0.51013 | 0.45273 | 80  | N8  | 0.83838  | 0.29774 | 0.31073 |

---

|    |      |         |         |         |     |     |         |         |         |
|----|------|---------|---------|---------|-----|-----|---------|---------|---------|
| 25 | Li25 | 0.91268 | 0.13437 | 0.66589 | 81  | O1  | 0.68560 | 0.71310 | 0.77060 |
| 26 | Li26 | 0.60246 | 0.36328 | 0.15834 | 82  | O2  | 0.85272 | 0.77710 | 0.27676 |
| 27 | Li27 | 0.10259 | 0.86328 | 0.34172 | 83  | O3  | 0.35189 | 0.27745 | 0.22326 |
| 28 | Li28 | 0.41284 | 0.63431 | 0.83424 | 84  | O4  | 0.18565 | 0.21317 | 0.72951 |
| 29 | Li29 | 0.96040 | 0.51069 | 0.13592 | 85  | O5  | 0.41284 | 0.92742 | 0.77644 |
| 30 | Li30 | 0.53773 | 0.98488 | 0.64652 | 86  | O6  | 0.06540 | 0.53803 | 0.28834 |
| 31 | Li31 | 0.03777 | 0.48482 | 0.85358 | 87  | O7  | 0.56558 | 0.03854 | 0.21167 |
| 32 | Li32 | 0.46058 | 0.01087 | 0.36403 | 88  | O8  | 0.91276 | 0.42742 | 0.72383 |
| 33 | Al1  | 0.82133 | 0.19602 | 0.52208 | 89  | O9  | 0.61255 | 0.57323 | 0.36492 |
| 34 | Al2  | 0.67835 | 0.29596 | 0.01667 | 90  | O10 | 0.87193 | 0.91806 | 0.86730 |
| 35 | Al3  | 0.17819 | 0.79604 | 0.48334 | 91  | O11 | 0.37195 | 0.41833 | 0.63292 |
| 36 | Al4  | 0.32154 | 0.69584 | 0.97804 | 92  | O12 | 0.11285 | 0.07347 | 0.13501 |
| 37 | Al5  | 0.79454 | 0.61121 | 0.27259 | 93  | O13 | 0.86557 | 0.96003 | 0.69025 |
| 38 | Al6  | 0.70202 | 0.88033 | 0.77194 | 94  | O14 | 0.64572 | 0.53790 | 0.18677 |
| 39 | Al7  | 0.20199 | 0.38037 | 0.72822 | 95  | O15 | 0.14555 | 0.03790 | 0.31315 |
| 40 | Al8  | 0.29436 | 0.11154 | 0.22745 | 96  | O16 | 0.36558 | 0.45989 | 0.80999 |
| 41 | H1   | 0.52296 | 0.68375 | 0.55845 | 97  | O17 | 0.42008 | 0.36443 | 0.04128 |
| 42 | H2   | 0.79958 | 0.64846 | 0.56454 | 98  | O18 | 0.08647 | 0.13133 | 0.54423 |
| 43 | H3   | 0.47829 | 0.50498 | 0.61924 | 99  | O19 | 0.58685 | 0.63135 | 0.95586 |
| 44 | H4   | 0.66282 | 0.69439 | 0.64735 | 100 | O20 | 0.92019 | 0.86469 | 0.45868 |
| 45 | H5   | 0.69463 | 0.84346 | 0.06295 | 101 | O21 | 0.66343 | 0.09668 | 0.44447 |
| 46 | H6   | 0.97119 | 0.80842 | 0.05763 | 102 | O22 | 0.83099 | 0.39148 | 0.93647 |
| 47 | H7   | 0.82216 | 0.79158 | 0.14444 | 103 | O23 | 0.33089 | 0.89144 | 0.56361 |
| 48 | H8   | 0.01312 | 0.98493 | 0.12058 | 104 | O24 | 0.16378 | 0.59638 | 0.05558 |
| 49 | H9   | 0.51209 | 0.48487 | 0.37934 | 105 | O25 | 0.87315 | 0.36330 | 0.51250 |
| 50 | H10  | 0.31707 | 0.29292 | 0.35466 | 106 | O26 | 0.61913 | 0.12822 | 0.00847 |
| 51 | H11  | 0.19059 | 0.34478 | 0.43647 | 107 | O27 | 0.11819 | 0.62834 | 0.49160 |
| 52 | H12  | 0.46497 | 0.30705 | 0.44167 | 108 | O28 | 0.37301 | 0.86313 | 0.98783 |
| 53 | H13  | 0.02242 | 0.18208 | 0.94266 | 109 | O29 | 0.62361 | 0.16653 | 0.60905 |
| 54 | H14  | 0.16224 | 0.19488 | 0.85371 | 110 | O30 | 0.88286 | 0.32527 | 0.10239 |
| 55 | H15  | 0.97844 | 0.00468 | 0.88100 | 111 | O31 | 0.38300 | 0.82531 | 0.39767 |
| 56 | H16  | 0.29969 | 0.14774 | 0.93594 | 112 | O32 | 0.12392 | 0.66653 | 0.89105 |

---

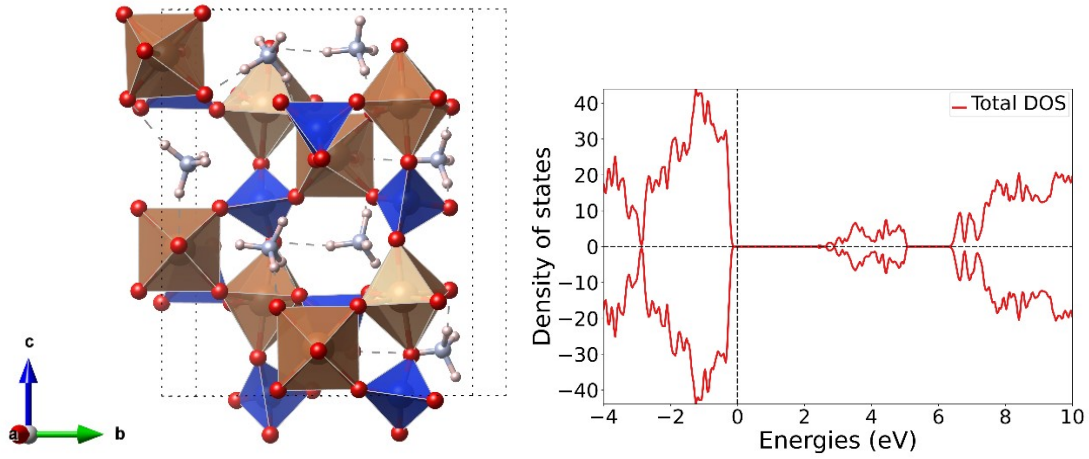

**Figure S11.** Structure diagram and density of states of  $\text{NH}_4(\text{SbO})(\text{SiO}_4)$ .

**Table S17.** Cell parameters of  $\text{NH}_4(\text{SbO})(\text{SiO}_4)$ , ICSD is the ICSD Collection Code, STRU is the chemical formula. The  $a, b, c$  (Å) and  $\alpha, \beta, \gamma$  (°) are unit cell parameters.  $V$  (Å<sup>3</sup>) is the cell volume and Structure parameters of  $\text{NH}_4(\text{SbO})(\text{SiO}_4)$ .

| ICSD  | STRU                                    | a    | b     | c     | $\alpha$ | $\beta$ | $\gamma$ | V      |
|-------|-----------------------------------------|------|-------|-------|----------|---------|----------|--------|
| 69429 | $\text{NH}_4(\text{SbO})(\text{SiO}_4)$ | 6.65 | 10.83 | 13.27 | 89.86    | 89.90   | 90.13    | 954.77 |

| NO. | E   | x       | y       | z       | NO. | E   | x       | y       | z       |
|-----|-----|---------|---------|---------|-----|-----|---------|---------|---------|
| 1   | Si1 | 0.16366 | 0.25180 | 0.00167 | 49  | N1  | 0.72197 | 0.31347 | 0.87977 |
| 2   | Si2 | 0.83168 | 0.75110 | 0.00160 | 50  | N2  | 0.27776 | 0.82558 | 0.11790 |
| 3   | Si3 | 0.66762 | 0.75211 | 0.50133 | 51  | N3  | 0.21509 | 0.80499 | 0.60980 |
| 4   | Si4 | 0.33304 | 0.25031 | 0.50071 | 52  | N4  | 0.77741 | 0.32362 | 0.38151 |
| 5   | Si5 | 0.99868 | 0.50572 | 0.68396 | 53  | N5  | 0.83911 | 0.06786 | 0.59976 |
| 6   | Si6 | 0.00167 | 0.00313 | 0.31808 | 54  | N6  | 0.18917 | 0.55137 | 0.39765 |
| 7   | Si7 | 0.48878 | 0.00172 | 0.81932 | 55  | N7  | 0.31543 | 0.55305 | 0.89800 |
| 8   | Si8 | 0.50348 | 0.50440 | 0.18455 | 56  | N8  | 0.68362 | 0.05169 | 0.10220 |
| 9   | Sb1 | 0.99246 | 0.00425 | 0.88122 | 57  | O1  | 0.01178 | 0.13303 | 0.98943 |
| 10  | Sb2 | 0.99914 | 0.50388 | 0.12210 | 58  | O2  | 0.98596 | 0.63357 | 0.01576 |
| 11  | Sb3 | 0.50428 | 0.50157 | 0.62109 | 59  | O3  | 0.52007 | 0.63108 | 0.51435 |
| 12  | Sb4 | 0.49592 | 0.00217 | 0.37959 | 60  | O4  | 0.48347 | 0.13133 | 0.48622 |
| 13  | Sb5 | 0.24530 | 0.25163 | 0.74883 | 61  | O5  | 0.02437 | 0.37762 | 0.01436 |
| 14  | Sb6 | 0.75351 | 0.74931 | 0.25575 | 62  | O6  | 0.96881 | 0.87663 | 0.98682 |
| 15  | Sb7 | 0.74292 | 0.75267 | 0.75513 | 63  | O7  | 0.52144 | 0.87420 | 0.48579 |
| 16  | Sb8 | 0.25279 | 0.24945 | 0.24689 | 64  | O8  | 0.47260 | 0.37482 | 0.51544 |
| 17  | H1  | 0.65357 | 0.36423 | 0.82270 | 65  | O9  | 0.30344 | 0.27342 | 0.89991 |
| 18  | H2  | 0.60590 | 0.27197 | 0.91845 | 66  | O10 | 0.69765 | 0.77069 | 0.10530 |
| 19  | H3  | 0.81385 | 0.36383 | 0.92779 | 67  | O11 | 0.80039 | 0.77377 | 0.60426 |
| 20  | H4  | 0.80977 | 0.24732 | 0.84471 | 68  | O12 | 0.19838 | 0.27225 | 0.39770 |
| 21  | H5  | 0.28438 | 0.86776 | 0.04851 | 69  | O13 | 0.31178 | 0.23462 | 0.09936 |
| 22  | H6  | 0.14225 | 0.84806 | 0.15301 | 70  | O14 | 0.68629 | 0.73115 | 0.90316 |
| 23  | H7  | 0.39231 | 0.85253 | 0.16710 | 71  | O15 | 0.81598 | 0.73606 | 0.40337 |

|    |     |         |         |         |    |     |         |         |         |
|----|-----|---------|---------|---------|----|-----|---------|---------|---------|
| 24 | H8  | 0.28534 | 0.73102 | 0.10926 | 72 | O16 | 0.18393 | 0.23131 | 0.59949 |
| 25 | H9  | 0.29306 | 0.84196 | 0.54876 | 73 | O17 | 0.19825 | 0.53781 | 0.61294 |
| 26 | H10 | 0.06238 | 0.82271 | 0.60855 | 74 | O18 | 0.80236 | 0.03363 | 0.38904 |
| 27 | H11 | 0.28407 | 0.83714 | 0.67441 | 75 | O19 | 0.68672 | 0.03271 | 0.88994 |
| 28 | H12 | 0.22841 | 0.70952 | 0.60929 | 76 | O20 | 0.30476 | 0.53812 | 0.11492 |
| 29 | H13 | 0.89126 | 0.35099 | 0.33155 | 77 | O21 | 0.80428 | 0.47574 | 0.61082 |
| 30 | H14 | 0.64146 | 0.34574 | 0.34667 | 78 | O22 | 0.19725 | 0.97633 | 0.39001 |
| 31 | H15 | 0.78462 | 0.36621 | 0.45043 | 79 | O23 | 0.29217 | 0.97810 | 0.89240 |
| 32 | H16 | 0.78562 | 0.22922 | 0.39097 | 80 | O24 | 0.69989 | 0.47889 | 0.11276 |
| 33 | H17 | 0.83069 | 0.03830 | 0.52527 | 81 | O25 | 0.95599 | 0.62355 | 0.75964 |
| 34 | H18 | 0.70038 | 0.10239 | 0.61973 | 82 | O26 | 0.04202 | 0.12004 | 0.24090 |
| 35 | H19 | 0.95028 | 0.13523 | 0.60530 | 83 | O27 | 0.44849 | 0.11802 | 0.74084 |
| 36 | H20 | 0.87475 | 0.99722 | 0.64923 | 84 | O28 | 0.54503 | 0.61835 | 0.26446 |
| 37 | H21 | 0.09207 | 0.58852 | 0.34338 | 85 | O29 | 0.04850 | 0.38878 | 0.75856 |
| 38 | H22 | 0.14476 | 0.56665 | 0.47120 | 86 | O30 | 0.95580 | 0.88559 | 0.24273 |
| 39 | H23 | 0.33165 | 0.58794 | 0.38895 | 87 | O31 | 0.52768 | 0.88117 | 0.74644 |
| 40 | H24 | 0.19994 | 0.45687 | 0.38809 | 88 | O32 | 0.45673 | 0.38459 | 0.25821 |
| 41 | H25 | 0.40825 | 0.58879 | 0.84089 | 89 | O33 | 0.52780 | 0.62783 | 0.72985 |
| 42 | H26 | 0.17291 | 0.59010 | 0.89362 | 90 | O34 | 0.47370 | 0.12915 | 0.27085 |
| 43 | H27 | 0.36858 | 0.56969 | 0.96962 | 91 | O35 | 0.01427 | 0.13999 | 0.77943 |
| 44 | H28 | 0.30212 | 0.45850 | 0.88974 | 92 | O36 | 0.97499 | 0.62961 | 0.23160 |
| 45 | H29 | 0.63072 | 0.06220 | 0.02939 | 93 | O37 | 0.46703 | 0.37480 | 0.72793 |
| 46 | H30 | 0.59088 | 0.08979 | 0.15772 | 94 | O38 | 0.53678 | 0.87599 | 0.27250 |
| 47 | H31 | 0.82521 | 0.09112 | 0.10343 | 95 | O39 | 0.95162 | 0.88551 | 0.76857 |
| 48 | H32 | 0.70040 | 0.95818 | 0.11514 | 96 | O40 | 0.03762 | 0.37640 | 0.22888 |

---

---

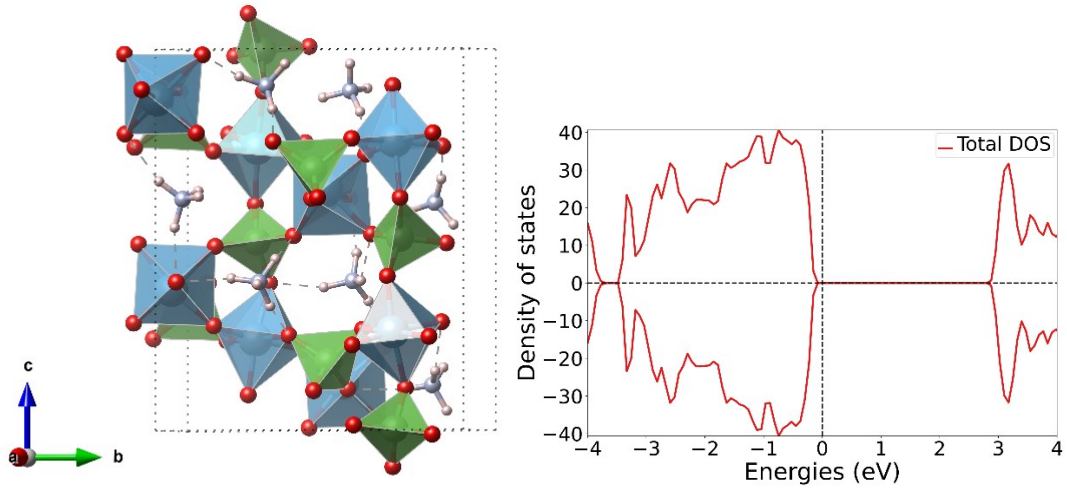

**Figure S12.** Structure diagram and density of states of  $\text{NH}_4(\text{TiO})(\text{AsO}_4)$ .

**Table S18.** Cell parameters of  $\text{NH}_4(\text{TiO})(\text{AsO}_4)$ , ICSD is the ICSD Collection Code, STRU is the chemical formula. The  $a$ ,  $b$ ,  $c$  (Å) and  $\alpha$ ,  $\beta$ ,  $\gamma$  ( $^\circ$ ) are unit cell parameters.  $V$  (Å<sup>3</sup>) is the cell volume and Structure parameters of  $\text{NH}_4(\text{TiO})(\text{AsO}_4)$ .

| ICSD  | STRU                                    | $a$  | $b$   | $c$   | $\alpha$ | $\beta$ | $\gamma$ | $V$    |
|-------|-----------------------------------------|------|-------|-------|----------|---------|----------|--------|
| 74591 | $\text{NH}_4(\text{TiO})(\text{AsO}_4)$ | 6.75 | 10.97 | 13.37 | 89.75    | 89.69   | 89.63    | 989.23 |

| NO. | E   | x       | y       | z       | NO. | E   | x       | y       | z       |
|-----|-----|---------|---------|---------|-----|-----|---------|---------|---------|
| 1   | Ti1 | 0.98076 | 0.00376 | 0.86805 | 49  | N1  | 0.71308 | 0.32953 | 0.90445 |
| 2   | Ti2 | 0.02006 | 0.50539 | 0.12750 | 50  | N2  | 0.28473 | 0.82498 | 0.11896 |
| 3   | Ti3 | 0.48548 | 0.50266 | 0.63062 | 51  | N3  | 0.20958 | 0.82526 | 0.59703 |
| 4   | Ti4 | 0.50727 | 0.00069 | 0.36983 | 52  | N4  | 0.78456 | 0.31412 | 0.38933 |
| 5   | Ti5 | 0.22546 | 0.24964 | 0.74237 | 53  | N5  | 0.82101 | 0.06908 | 0.60721 |
| 6   | Ti6 | 0.77374 | 0.74680 | 0.25809 | 54  | N6  | 0.18900 | 0.55623 | 0.39315 |
| 7   | Ti7 | 0.72243 | 0.74899 | 0.75762 | 55  | N7  | 0.31263 | 0.56095 | 0.89138 |
| 8   | Ti8 | 0.27397 | 0.24863 | 0.23961 | 56  | N8  | 0.68703 | 0.05534 | 0.10489 |
| 9   | As1 | 0.16457 | 0.25957 | 0.99586 | 57  | O1  | 0.49446 | 0.14095 | 0.48426 |
| 10  | As2 | 0.84018 | 0.76022 | 0.00261 | 58  | O2  | 0.49050 | 0.64782 | 0.51493 |
| 11  | As3 | 0.66427 | 0.75912 | 0.50363 | 59  | O3  | 0.00756 | 0.64454 | 0.01263 |
| 12  | As4 | 0.33499 | 0.25980 | 0.49616 | 60  | O4  | 0.98686 | 0.15097 | 0.98504 |
| 13  | As5 | 0.98201 | 0.51126 | 0.68270 | 61  | O5  | 0.05124 | 0.39962 | 0.00869 |
| 14  | As6 | 0.01246 | 0.01081 | 0.31816 | 62  | O6  | 0.96508 | 0.89554 | 0.98766 |
| 15  | As7 | 0.47972 | 0.01001 | 0.81718 | 63  | O7  | 0.54405 | 0.89712 | 0.49038 |
| 16  | As8 | 0.52216 | 0.51019 | 0.18045 | 64  | O8  | 0.46721 | 0.39258 | 0.51119 |
| 17  | H1  | 0.79406 | 0.35801 | 0.84237 | 65  | O9  | 0.30912 | 0.27795 | 0.88944 |
| 18  | H2  | 0.56439 | 0.31369 | 0.88866 | 66  | O10 | 0.70142 | 0.78058 | 0.11060 |
| 19  | H3  | 0.72865 | 0.39207 | 0.96130 | 67  | O11 | 0.80693 | 0.77421 | 0.60961 |
| 20  | H4  | 0.77941 | 0.24883 | 0.92886 | 68  | O12 | 0.19739 | 0.28616 | 0.38862 |
| 21  | H5  | 0.26799 | 0.86970 | 0.05154 | 69  | O13 | 0.17174 | 0.23770 | 0.59550 |
| 22  | H6  | 0.16401 | 0.84766 | 0.16521 | 70  | O14 | 0.82235 | 0.73431 | 0.40316 |
| 23  | H7  | 0.41458 | 0.84730 | 0.15481 | 71  | O15 | 0.68027 | 0.73759 | 0.90365 |

|    |     |         |         |         |    |     |         |         |         |
|----|-----|---------|---------|---------|----|-----|---------|---------|---------|
| 24 | H8  | 0.28634 | 0.73149 | 0.10718 | 72 | O16 | 0.32192 | 0.23015 | 0.09494 |
| 25 | H9  | 0.23003 | 0.88743 | 0.53986 | 73 | O17 | 0.68131 | 0.04578 | 0.88988 |
| 26 | H10 | 0.05933 | 0.81048 | 0.61121 | 74 | O18 | 0.32089 | 0.55350 | 0.10946 |
| 27 | H11 | 0.28712 | 0.85360 | 0.65952 | 75 | O19 | 0.18437 | 0.54564 | 0.60906 |
| 28 | H12 | 0.27520 | 0.74400 | 0.57402 | 76 | O20 | 0.80804 | 0.04705 | 0.38991 |
| 29 | H13 | 0.70764 | 0.34179 | 0.32593 | 77 | O21 | 0.72320 | 0.48460 | 0.10382 |
| 30 | H14 | 0.72353 | 0.36044 | 0.44960 | 78 | O22 | 0.27898 | 0.98412 | 0.89335 |
| 31 | H15 | 0.93689 | 0.32442 | 0.38271 | 79 | O23 | 0.21174 | 0.97992 | 0.39386 |
| 32 | H16 | 0.75923 | 0.22157 | 0.39912 | 80 | O24 | 0.78107 | 0.48396 | 0.60801 |
| 33 | H17 | 0.80832 | 0.04198 | 0.53325 | 81 | O25 | 0.44701 | 0.13000 | 0.73364 |
| 34 | H18 | 0.68594 | 0.10594 | 0.62866 | 82 | O26 | 0.55853 | 0.62670 | 0.26496 |
| 35 | H19 | 0.93267 | 0.13289 | 0.61303 | 83 | O27 | 0.94488 | 0.63135 | 0.76436 |
| 36 | H20 | 0.85276 | 0.99608 | 0.65410 | 84 | O28 | 0.05120 | 0.13234 | 0.23812 |
| 37 | H21 | 0.09566 | 0.59681 | 0.34076 | 85 | O29 | 0.01914 | 0.38390 | 0.75675 |
| 38 | H22 | 0.13624 | 0.56273 | 0.46590 | 86 | O30 | 0.97203 | 0.88542 | 0.24415 |
| 39 | H23 | 0.32735 | 0.59625 | 0.39325 | 87 | O31 | 0.51546 | 0.88204 | 0.74446 |
| 40 | H24 | 0.20673 | 0.46449 | 0.37661 | 88 | O32 | 0.48494 | 0.37952 | 0.24965 |
| 41 | H25 | 0.39984 | 0.60163 | 0.83596 | 89 | O33 | 0.42402 | 0.38748 | 0.71666 |
| 42 | H26 | 0.17411 | 0.60162 | 0.89827 | 90 | O34 | 0.56816 | 0.88393 | 0.28356 |
| 43 | H27 | 0.37481 | 0.56629 | 0.96160 | 91 | O35 | 0.92028 | 0.89278 | 0.77844 |
| 44 | H28 | 0.29232 | 0.47024 | 0.87411 | 92 | O36 | 0.08178 | 0.38760 | 0.21270 |
| 45 | H29 | 0.62871 | 0.05983 | 0.03341 | 93 | O37 | 0.04524 | 0.13738 | 0.77972 |
| 46 | H30 | 0.59546 | 0.09527 | 0.15860 | 94 | O38 | 0.96183 | 0.63487 | 0.22269 |
| 47 | H31 | 0.82336 | 0.09795 | 0.09991 | 95 | O39 | 0.54019 | 0.63473 | 0.72378 |
| 48 | H32 | 0.71100 | 0.96443 | 0.12256 | 96 | O40 | 0.45496 | 0.13207 | 0.27604 |

---

---

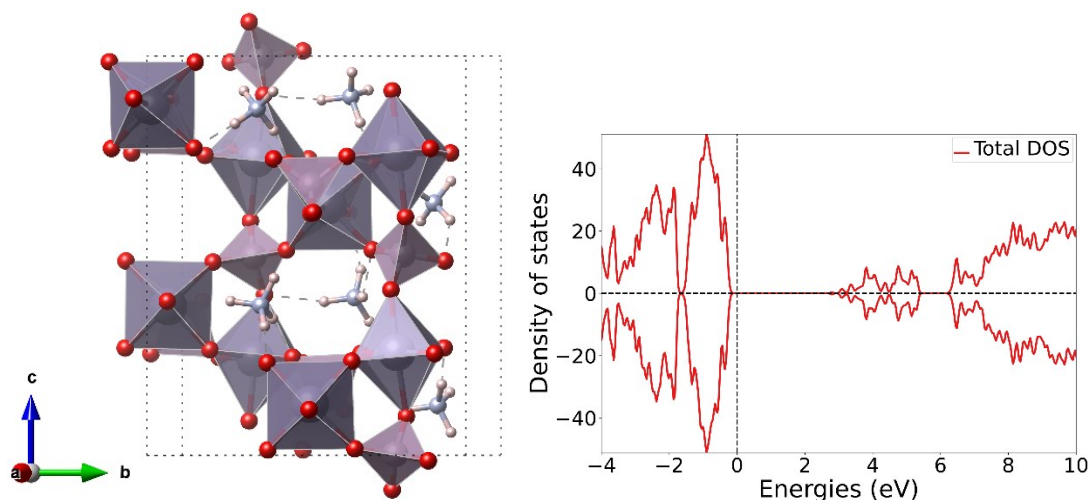

**Figure S13.** Structure diagram and density of states of  $\text{NH}_4\text{SnO}(\text{PO}_4)$ .

**Table S19.** Cell parameters of  $\text{NH}_4\text{SnO}(\text{PO}_4)$ , ICSD is the ICSD Collection Code, STRU is the chemical formula. The  $a$ ,  $b$ ,  $c$  (Å) and  $\alpha$ ,  $\beta$ ,  $\gamma$  ( $^\circ$ ) are unit cell parameters.  $V$  (Å<sup>3</sup>) is the cell volume and Structure parameters of  $\text{NH}_4\text{SnO}(\text{PO}_4)$ .

| ICSD  | STRU                                   | $a$  | $b$   | $c$   | $\alpha$ | $\beta$ | $\gamma$ | $V$    |
|-------|----------------------------------------|------|-------|-------|----------|---------|----------|--------|
| 79650 | $\text{NH}_4(\text{SnO})(\text{PO}_4)$ | 6.71 | 10.92 | 13.43 | 90.00    | 90.00   | 89.87    | 983.87 |

| NO. | E   | x       | y       | z       | NO. | E   | x       | y       | z       |
|-----|-----|---------|---------|---------|-----|-----|---------|---------|---------|
| 1   | Sn1 | 0.99399 | 0.01314 | 0.87463 | 49  | N1  | 0.71884 | 0.31458 | 0.86823 |
| 2   | Sn2 | 0.99915 | 0.51249 | 0.12764 | 50  | N2  | 0.28400 | 0.83347 | 0.12447 |
| 3   | Sn3 | 0.49395 | 0.51315 | 0.62550 | 51  | N3  | 0.21889 | 0.81456 | 0.63193 |
| 4   | Sn4 | 0.49910 | 0.01245 | 0.37249 | 52  | N4  | 0.78393 | 0.33333 | 0.37559 |
| 5   | Sn5 | 0.23932 | 0.26033 | 0.74302 | 53  | N5  | 0.82711 | 0.06546 | 0.60128 |
| 6   | Sn6 | 0.75672 | 0.75717 | 0.25808 | 54  | N6  | 0.18570 | 0.56221 | 0.39507 |
| 7   | Sn7 | 0.73934 | 0.76033 | 0.75709 | 55  | N7  | 0.32702 | 0.56545 | 0.89883 |
| 8   | Sn8 | 0.25672 | 0.25718 | 0.24204 | 56  | N8  | 0.68570 | 0.06225 | 0.10507 |
| 9   | P1  | 0.15174 | 0.26465 | 0.99755 | 57  | O1  | 0.00949 | 0.15263 | 0.98520 |
| 10  | P2  | 0.84545 | 0.76233 | 0.00246 | 58  | O2  | 0.99201 | 0.65152 | 0.01617 |
| 11  | P3  | 0.65179 | 0.76461 | 0.50257 | 59  | O3  | 0.50949 | 0.65260 | 0.51491 |
| 12  | P4  | 0.34545 | 0.26230 | 0.49767 | 60  | O4  | 0.49198 | 0.15147 | 0.48396 |
| 13  | P5  | 0.98924 | 0.51356 | 0.67620 | 61  | O5  | 0.01891 | 0.38158 | 0.01338 |
| 14  | P6  | 0.00451 | 0.01443 | 0.32009 | 62  | O6  | 0.97358 | 0.87985 | 0.98594 |
| 15  | P7  | 0.48926 | 0.01353 | 0.82398 | 63  | O7  | 0.51901 | 0.88156 | 0.48677 |
| 16  | P8  | 0.50453 | 0.51446 | 0.18002 | 64  | O8  | 0.47360 | 0.37982 | 0.51420 |
| 17  | H1  | 0.62625 | 0.35699 | 0.81349 | 65  | O9  | 0.27915 | 0.28700 | 0.90279 |
| 18  | H2  | 0.62826 | 0.26343 | 0.91313 | 66  | O10 | 0.71837 | 0.78299 | 0.09749 |
| 19  | H3  | 0.80114 | 0.37389 | 0.91124 | 67  | O11 | 0.77923 | 0.78689 | 0.59733 |
| 20  | H4  | 0.81729 | 0.25659 | 0.83099 | 68  | O12 | 0.21837 | 0.28296 | 0.40265 |
| 21  | H5  | 0.29605 | 0.87666 | 0.05703 | 69  | O13 | 0.29495 | 0.24297 | 0.08597 |
| 22  | H6  | 0.14943 | 0.85669 | 0.15752 | 70  | O14 | 0.70481 | 0.73720 | 0.91327 |

|    |     |         |         |         |    |     |         |         |         |
|----|-----|---------|---------|---------|----|-----|---------|---------|---------|
| 23 | H7  | 0.39690 | 0.85817 | 0.17727 | 71 | O15 | 0.79500 | 0.74294 | 0.41416 |
| 24 | H8  | 0.28826 | 0.74010 | 0.11401 | 72 | O16 | 0.20478 | 0.23718 | 0.58685 |
| 25 | H9  | 0.12829 | 0.76342 | 0.58703 | 73 | O17 | 0.17271 | 0.54074 | 0.60818 |
| 26 | H10 | 0.12630 | 0.85697 | 0.68666 | 74 | O18 | 0.81923 | 0.04406 | 0.38598 |
| 27 | H11 | 0.30120 | 0.87387 | 0.58892 | 75 | O19 | 0.67275 | 0.04070 | 0.89197 |
| 28 | H12 | 0.31733 | 0.75656 | 0.66916 | 76 | O20 | 0.31927 | 0.54408 | 0.11411 |
| 29 | H13 | 0.89688 | 0.35811 | 0.32284 | 77 | O21 | 0.80697 | 0.49283 | 0.60649 |
| 30 | H14 | 0.64940 | 0.35651 | 0.34248 | 78 | O22 | 0.18537 | 0.99518 | 0.39047 |
| 31 | H15 | 0.79581 | 0.37652 | 0.44304 | 79 | O23 | 0.30700 | 0.99278 | 0.89370 |
| 32 | H16 | 0.78831 | 0.23996 | 0.38604 | 80 | O24 | 0.68541 | 0.49523 | 0.10967 |
| 33 | H17 | 0.91754 | 0.07886 | 0.54063 | 81 | O25 | 0.95386 | 0.62227 | 0.74882 |
| 34 | H18 | 0.69086 | 0.10523 | 0.58516 | 82 | O26 | 0.03950 | 0.12063 | 0.24521 |
| 35 | H19 | 0.89365 | 0.10204 | 0.66678 | 83 | O27 | 0.45383 | 0.12228 | 0.75139 |
| 36 | H20 | 0.80639 | 0.97232 | 0.60988 | 84 | O28 | 0.53948 | 0.62065 | 0.25491 |
| 37 | H21 | 0.09762 | 0.59825 | 0.33548 | 85 | O29 | 0.02632 | 0.40036 | 0.74266 |
| 38 | H22 | 0.12285 | 0.57449 | 0.46436 | 86 | O30 | 0.96925 | 0.89914 | 0.25463 |
| 39 | H23 | 0.32445 | 0.60230 | 0.39642 | 87 | O31 | 0.52631 | 0.90037 | 0.75748 |
| 40 | H24 | 0.20491 | 0.46923 | 0.38497 | 88 | O32 | 0.46925 | 0.39916 | 0.24549 |
| 41 | H25 | 0.39368 | 0.60204 | 0.83338 | 89 | O33 | 0.00568 | 0.14850 | 0.77002 |
| 42 | H26 | 0.19074 | 0.60523 | 0.91488 | 90 | O34 | 0.98150 | 0.64080 | 0.23581 |
| 43 | H27 | 0.41728 | 0.57883 | 0.95956 | 91 | O35 | 0.50567 | 0.64852 | 0.73009 |
| 44 | H28 | 0.30632 | 0.47231 | 0.89022 | 92 | O36 | 0.48148 | 0.14079 | 0.26431 |
| 45 | H29 | 0.62278 | 0.07448 | 0.03579 | 93 | O37 | 0.45893 | 0.38482 | 0.73138 |
| 46 | H30 | 0.59763 | 0.09828 | 0.16467 | 94 | O38 | 0.53802 | 0.88136 | 0.26876 |
| 47 | H31 | 0.82441 | 0.10239 | 0.10367 | 95 | O39 | 0.95896 | 0.88481 | 0.76875 |
| 48 | H32 | 0.70501 | 0.96929 | 0.11519 | 96 | O40 | 0.03804 | 0.38138 | 0.23137 |

---

---



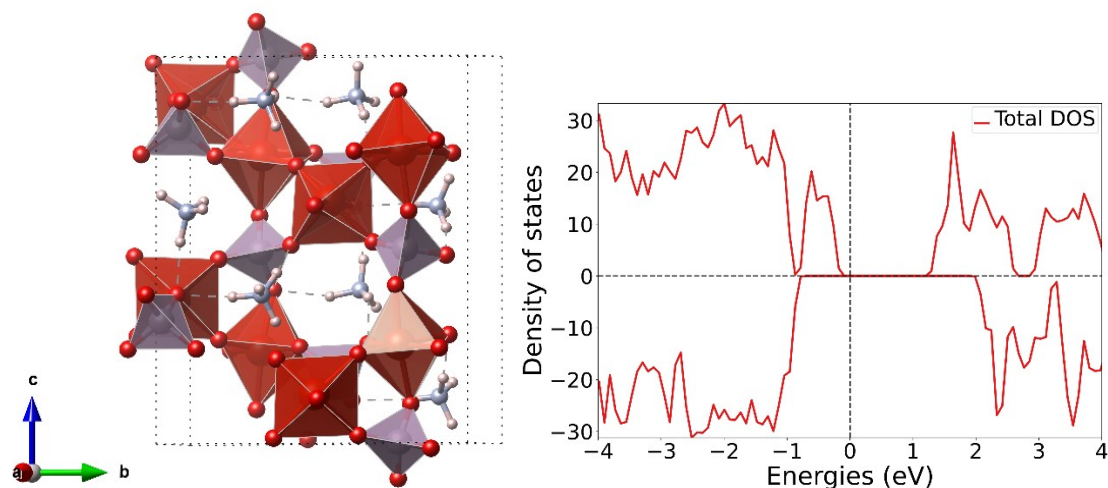

**Figure S14.** Structure diagram and density of states of  $\text{NH}_4(\text{VO})(\text{PO}_4)$ .

**Table S20.** Cell parameters of  $\text{NH}_4(\text{VO})(\text{PO}_4)$ , ICSD is the ICSD Collection Code, STRU is the chemical formula. The  $a$ ,  $b$ ,  $c$  (Å) and  $\alpha$ ,  $\beta$ ,  $\gamma$  ( $^\circ$ ) are unit cell parameters.  $V$  (Å<sup>3</sup>) is the cell volume and Structure parameters of  $\text{NH}_4(\text{VO})(\text{PO}_4)$ .

| ICSD  | STRU                                | $a$  | $b$   | $c$   | $\alpha$ | $\beta$ | $\gamma$ | $V$    |
|-------|-------------------------------------|------|-------|-------|----------|---------|----------|--------|
| 79651 | $\text{NH}_4\text{VO}(\text{PO}_4)$ | 6.55 | 10.64 | 13.04 | 89.70    | 89.64   | 90.11    | 909.35 |

| NO. | E  | $x$     | $y$     | $z$     | NO. | E   | $x$     | $y$     | $z$     |
|-----|----|---------|---------|---------|-----|-----|---------|---------|---------|
| 1   | V1 | 0.00837 | 0.00406 | 0.87349 | 49  | N1  | 0.71145 | 0.31848 | 0.88720 |
| 2   | V2 | 0.99299 | 0.50643 | 0.12684 | 50  | N2  | 0.27960 | 0.83058 | 0.12188 |
| 3   | V3 | 0.51204 | 0.50394 | 0.62720 | 51  | N3  | 0.20761 | 0.81668 | 0.61404 |
| 4   | V4 | 0.48479 | 0.00289 | 0.37193 | 52  | N4  | 0.78897 | 0.31621 | 0.38428 |
| 5   | V5 | 0.23505 | 0.25701 | 0.74588 | 53  | N5  | 0.82818 | 0.08107 | 0.59910 |
| 6   | V6 | 0.76474 | 0.75473 | 0.25518 | 54  | N6  | 0.19294 | 0.56657 | 0.39783 |
| 7   | V7 | 0.73392 | 0.75678 | 0.75536 | 55  | N7  | 0.30886 | 0.56771 | 0.89725 |
| 8   | V8 | 0.26483 | 0.25716 | 0.24327 | 56  | N8  | 0.68709 | 0.06291 | 0.10044 |
| 9   | P1 | 0.16133 | 0.26274 | 0.99769 | 57  | O1  | 0.02640 | 0.14542 | 0.98106 |
| 10  | P2 | 0.83823 | 0.76219 | 0.00304 | 58  | O2  | 0.97653 | 0.64575 | 0.02033 |
| 11  | P3 | 0.66181 | 0.76266 | 0.50293 | 59  | O3  | 0.52790 | 0.64427 | 0.52048 |
| 12  | P4 | 0.33694 | 0.26104 | 0.49683 | 60  | O4  | 0.46881 | 0.14274 | 0.47844 |
| 13  | P5 | 0.00239 | 0.51819 | 0.68248 | 61  | O5  | 0.02165 | 0.37970 | 0.01406 |
| 14  | P6 | 0.99438 | 0.01761 | 0.31651 | 62  | O6  | 0.97595 | 0.87972 | 0.98580 |
| 15  | P7 | 0.50149 | 0.01744 | 0.81786 | 63  | O7  | 0.51809 | 0.87808 | 0.48602 |
| 16  | P8 | 0.50000 | 0.51877 | 0.18203 | 64  | O8  | 0.48018 | 0.37621 | 0.51390 |
| 17  | H1 | 0.76147 | 0.35844 | 0.81971 | 65  | O9  | 0.29399 | 0.28945 | 0.89968 |
| 18  | H2 | 0.55576 | 0.32969 | 0.89798 | 66  | O10 | 0.70690 | 0.78537 | 0.10147 |
| 19  | H3 | 0.80016 | 0.35444 | 0.94643 | 67  | O11 | 0.79280 | 0.78785 | 0.60006 |
| 20  | H4 | 0.73502 | 0.22227 | 0.88286 | 68  | O12 | 0.20618 | 0.28881 | 0.39927 |
| 21  | H5 | 0.28562 | 0.87197 | 0.05061 | 69  | O13 | 0.30378 | 0.24609 | 0.09084 |
| 22  | H6 | 0.14548 | 0.85823 | 0.15863 | 70  | O14 | 0.69845 | 0.74398 | 0.90892 |
| 23  | H7 | 0.40042 | 0.85585 | 0.16833 | 71  | O15 | 0.80284 | 0.74756 | 0.40831 |
| 24  | H8 | 0.28130 | 0.73367 | 0.11413 | 72  | O16 | 0.19319 | 0.24387 | 0.59086 |

|    |     |         |         |         |    |     |         |         |         |
|----|-----|---------|---------|---------|----|-----|---------|---------|---------|
| 25 | H9  | 0.30397 | 0.85475 | 0.55772 | 73 | O17 | 0.19333 | 0.54714 | 0.61381 |
| 26 | H10 | 0.05292 | 0.82391 | 0.59777 | 74 | O18 | 0.80301 | 0.04453 | 0.38506 |
| 27 | H11 | 0.23999 | 0.85711 | 0.68321 | 75 | O19 | 0.69064 | 0.04797 | 0.88604 |
| 28 | H12 | 0.23647 | 0.72113 | 0.61985 | 76 | O20 | 0.31249 | 0.55183 | 0.11381 |
| 29 | H13 | 0.75213 | 0.35644 | 0.31523 | 77 | O21 | 0.81499 | 0.48913 | 0.61407 |
| 30 | H14 | 0.69468 | 0.35371 | 0.44134 | 78 | O22 | 0.18135 | 0.98715 | 0.38463 |
| 31 | H15 | 0.94386 | 0.32502 | 0.39874 | 79 | O23 | 0.31307 | 0.98873 | 0.88742 |
| 32 | H16 | 0.76095 | 0.22053 | 0.37955 | 80 | O24 | 0.68999 | 0.49127 | 0.11437 |
| 33 | H17 | 0.81166 | 0.05697 | 0.52214 | 81 | O25 | 0.96390 | 0.63235 | 0.75422 |
| 34 | H18 | 0.69317 | 0.11857 | 0.62632 | 82 | O26 | 0.03322 | 0.13253 | 0.24497 |
| 35 | H19 | 0.94814 | 0.14416 | 0.60561 | 83 | O27 | 0.46395 | 0.13091 | 0.74448 |
| 36 | H20 | 0.85812 | 0.00243 | 0.64277 | 84 | O28 | 0.53809 | 0.62953 | 0.25760 |
| 37 | H21 | 0.07797 | 0.60538 | 0.35381 | 85 | O29 | 0.04444 | 0.40300 | 0.75246 |
| 38 | H22 | 0.16797 | 0.57476 | 0.47636 | 86 | O30 | 0.94968 | 0.90403 | 0.24537 |
| 39 | H23 | 0.33063 | 0.60782 | 0.37840 | 87 | O31 | 0.54531 | 0.90209 | 0.74931 |
| 40 | H24 | 0.20652 | 0.47181 | 0.38185 | 88 | O32 | 0.45470 | 0.40174 | 0.24990 |
| 41 | H25 | 0.42031 | 0.60428 | 0.84869 | 89 | O33 | 0.05413 | 0.14435 | 0.77530 |
| 42 | H26 | 0.17118 | 0.61116 | 0.88363 | 90 | O34 | 0.95025 | 0.64284 | 0.22915 |
| 43 | H27 | 0.34369 | 0.57640 | 0.97449 | 91 | O35 | 0.55347 | 0.64122 | 0.72842 |
| 44 | H28 | 0.28828 | 0.47317 | 0.88240 | 92 | O36 | 0.44395 | 0.14065 | 0.27081 |
| 45 | H29 | 0.65466 | 0.07234 | 0.02282 | 93 | O37 | 0.45276 | 0.39013 | 0.71776 |
| 46 | H30 | 0.57726 | 0.10163 | 0.14821 | 94 | O38 | 0.54342 | 0.88954 | 0.28065 |
| 47 | H31 | 0.82670 | 0.10418 | 0.11411 | 95 | O39 | 0.95128 | 0.89403 | 0.78018 |
| 48 | H32 | 0.70242 | 0.96765 | 0.11541 | 96 | O40 | 0.05061 | 0.39189 | 0.21731 |

---

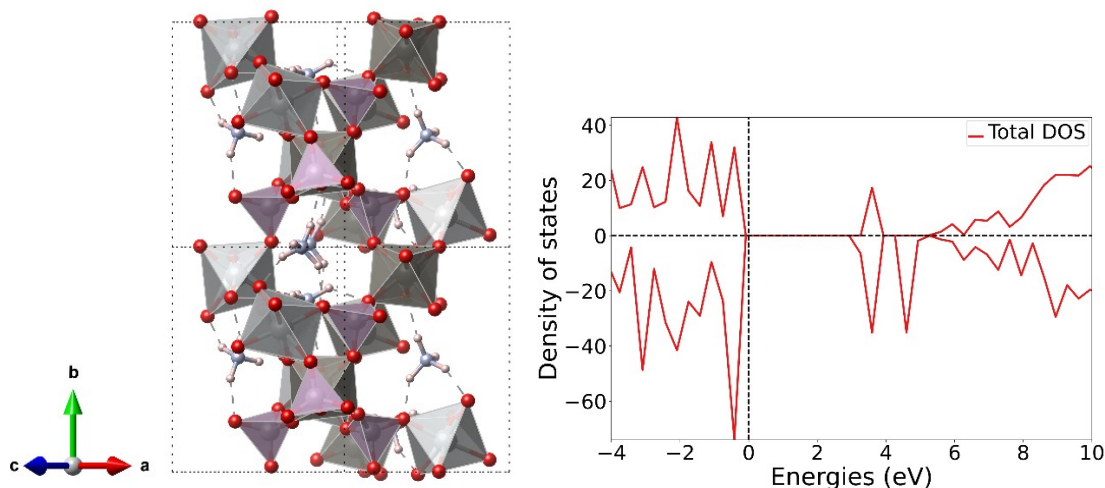

**Figure S15.** Structure diagram and density of states of  $(\text{NH}_4)_2\text{Ni}(\text{WO}_2(\text{PO}_4)_2)$ .

**Table S21.** Cell parameters of  $(\text{NH}_4)_2\text{Ni}(\text{WO}_2(\text{PO}_4)_2)$ , ICSD is the ICSD Collection Code, STRU is the chemical formula. The  $a$ ,  $b$ ,  $c$  ( $\text{\AA}$ ) and  $\alpha$ ,  $\beta$ ,  $\gamma$  ( $^\circ$ ) are unit cell parameters.  $V$  ( $\text{\AA}^3$ ) is the cell volume and Structure parameters of  $(\text{NH}_4)_2\text{Ni}(\text{WO}_2(\text{PO}_4)_2)$ .

| ICSD  | STRU                                                   | a    | b    | c     | $\alpha$ | $\beta$ | $\gamma$ | V      |
|-------|--------------------------------------------------------|------|------|-------|----------|---------|----------|--------|
| 79702 | $(\text{NH}_4)_2\text{Ni}(\text{WO}_2(\text{PO}_4)_2)$ | 9.49 | 9.43 | 10.77 | 90.14    | 89.77   | 90.07    | 964.34 |

| NO. | E   | x       | y       | z        | NO. | E   | x        | y       | z       |
|-----|-----|---------|---------|----------|-----|-----|----------|---------|---------|
| 1   | Ni1 | 0.13117 | 0.87555 | 0.74826  | 49  | N1  | 0.49077  | 0.76439 | 0.69027 |
| 2   | Ni2 | 0.87161 | 0.13672 | 0.25383  | 50  | N2  | 0.50846  | 0.19959 | 0.19468 |
| 3   | Ni3 | 0.37746 | 0.37690 | 0.50108  | 51  | N3  | 0.26211  | 0.01377 | 0.44397 |
| 4   | Ni4 | 0.63371 | 0.63712 | 0.99874  | 52  | N4  | 0.70162  | 0.99835 | 0.94817 |
| 5   | P1  | 0.82554 | 0.67570 | 0.74723  | 53  | N5  | 0.19361  | 0.50897 | 0.80309 |
| 6   | P2  | 0.18479 | 0.33090 | 0.24926  | 54  | N6  | 0.80867  | 0.49756 | 0.30206 |
| 7   | P3  | 0.17581 | 0.67974 | 0.49627  | 55  | N7  | 0.01054  | 0.26693 | 0.56271 |
| 8   | P4  | 0.83107 | 0.32846 | -0.00103 | 56  | N8  | -0.00134 | 0.70428 | 0.05439 |
| 9   | P5  | 0.32699 | 0.18144 | 0.75148  | 57  | O1  | 0.72053  | 0.25683 | 0.62596 |
| 10  | P6  | 0.67555 | 0.82927 | 0.25146  | 58  | O2  | 0.28324  | 0.74729 | 0.12072 |
| 11  | P7  | 0.67450 | 0.17738 | 0.50348  | 59  | O3  | 0.75792  | 0.78095 | 0.37080 |
| 12  | P8  | 0.32432 | 0.83124 | 0.00019  | 60  | O4  | 0.24383  | 0.22405 | 0.87261 |
| 13  | H1  | 0.39214 | 0.78919 | 0.65230  | 61  | O5  | 0.74691  | 0.28093 | 0.88014 |
| 14  | H2  | 0.50586 | 0.65677 | 0.67505  | 62  | O6  | 0.25901  | 0.72558 | 0.37582 |
| 15  | H3  | 0.49090 | 0.78561 | 0.78450  | 63  | O7  | 0.78080  | 0.75625 | 0.62570 |
| 16  | H4  | 0.57275 | 0.81745 | 0.64853  | 64  | O8  | 0.22270  | 0.24704 | 0.12780 |
| 17  | H5  | 0.41720 | 0.19813 | 0.14278  | 65  | O9  | 0.78643  | 0.51441 | 0.72237 |
| 18  | H6  | 0.55408 | 0.09951 | 0.20743  | 66  | O10 | 0.22421  | 0.49090 | 0.22015 |
| 19  | H7  | 0.48360 | 0.23926 | 0.28127  | 67  | O11 | 0.01591  | 0.72303 | 0.46998 |
| 20  | H8  | 0.58821 | 0.25828 | 0.15340  | 68  | O12 | 0.98962  | 0.28568 | 0.97076 |
| 21  | H9  | 0.15465 | 0.00441 | 0.43006  | 69  | O13 | 0.48656  | 0.22230 | 0.78053 |

|    |     |         |         |         |    |     |         |         |         |
|----|-----|---------|---------|---------|----|-----|---------|---------|---------|
| 22 | H10 | 0.30785 | 0.92606 | 0.40327 | 70 | O14 | 0.51574 | 0.79075 | 0.27818 |
| 23 | H11 | 0.28420 | 0.01444 | 0.53822 | 71 | O15 | 0.71794 | 0.01584 | 0.52731 |
| 24 | H12 | 0.29307 | 0.10986 | 0.40405 | 72 | O16 | 0.28171 | 0.99068 | 0.02943 |
| 25 | H13 | 0.59901 | 0.95834 | 0.95644 | 73 | O17 | 0.27652 | 0.27702 | 0.64488 |
| 26 | H14 | 0.75546 | 0.91708 | 0.90341 | 74 | O18 | 0.73052 | 0.74497 | 0.13953 |
| 27 | H15 | 0.74006 | 0.01295 | 0.03649 | 75 | O19 | 0.76362 | 0.23437 | 0.39505 |
| 28 | H16 | 0.70754 | 0.09387 | 0.90120 | 76 | O20 | 0.23703 | 0.77545 | 0.89094 |
| 29 | H17 | 0.09275 | 0.55278 | 0.79339 | 77 | O21 | 0.73907 | 0.73327 | 0.85668 |
| 30 | H18 | 0.19624 | 0.41477 | 0.85199 | 78 | O22 | 0.27886 | 0.27811 | 0.35506 |
| 31 | H19 | 0.24994 | 0.58950 | 0.84606 | 79 | O23 | 0.22705 | 0.77217 | 0.60501 |
| 32 | H20 | 0.23137 | 0.48998 | 0.71472 | 80 | O24 | 0.77604 | 0.24588 | 0.11150 |
| 33 | H21 | 0.75361 | 0.41627 | 0.34592 | 81 | O25 | 0.30995 | 0.02434 | 0.72208 |
| 34 | H22 | 0.91138 | 0.45824 | 0.29613 | 82 | O26 | 0.69209 | 0.98892 | 0.23223 |
| 35 | H23 | 0.80139 | 0.59331 | 0.34880 | 83 | O27 | 0.51706 | 0.19243 | 0.48240 |
| 36 | H24 | 0.77275 | 0.51128 | 0.21280 | 84 | O28 | 0.48232 | 0.82104 | 0.97348 |
| 37 | H25 | 0.92929 | 0.32253 | 0.60321 | 85 | O29 | 0.98382 | 0.69210 | 0.76825 |
| 38 | H26 | 0.99289 | 0.16042 | 0.58020 | 86 | O30 | 0.02789 | 0.31603 | 0.28089 |
| 39 | H27 | 0.10999 | 0.29171 | 0.59940 | 87 | O31 | 0.19144 | 0.52173 | 0.51978 |
| 40 | H28 | 0.01065 | 0.28535 | 0.46798 | 88 | O32 | 0.82034 | 0.48843 | 0.01828 |
| 41 | H29 | 0.91892 | 0.76051 | 0.09824 | 89 | O33 | 0.50818 | 0.46160 | 0.63219 |
| 42 | H30 | 0.95469 | 0.60314 | 0.04130 | 90 | O34 | 0.50516 | 0.55587 | 0.12833 |
| 43 | H31 | 0.09189 | 0.70427 | 0.10390 | 91 | O35 | 0.95503 | 0.00076 | 0.38034 |
| 44 | H32 | 0.01935 | 0.74603 | 0.96802 | 92 | O36 | 0.04833 | 0.00322 | 0.88039 |
| 45 | W1  | 0.61771 | 0.38593 | 0.75271 | 93 | O37 | 0.55492 | 0.50123 | 0.87443 |
| 46 | W2  | 0.39045 | 0.62012 | 0.24978 | 94 | O38 | 0.45840 | 0.50938 | 0.37112 |
| 47 | W3  | 0.88344 | 0.88621 | 0.50030 | 95 | O39 | 0.99335 | 0.95921 | 0.62213 |
| 48 | W4  | 0.11488 | 0.11731 | 0.00086 | 96 | O40 | 0.00154 | 0.05360 | 0.12306 |

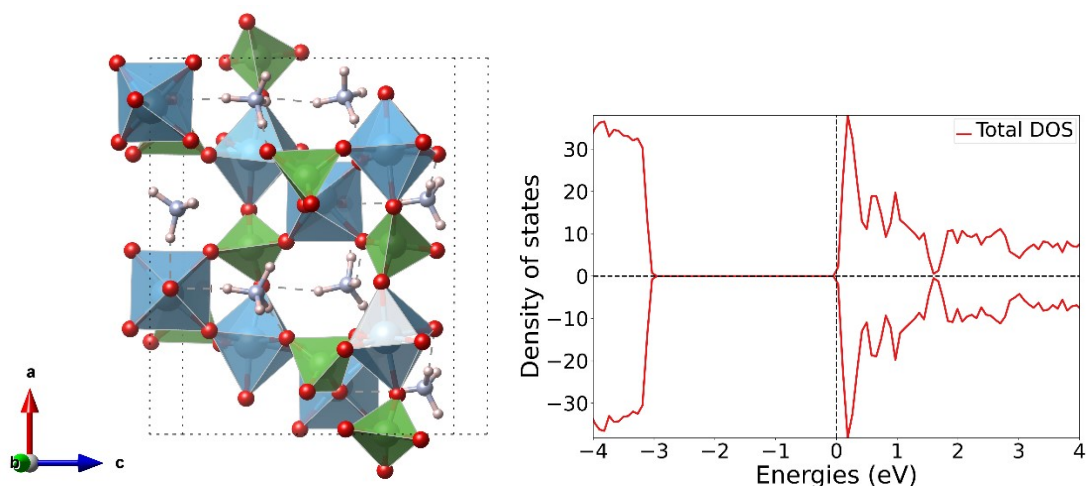

**Figure S16.** Structure diagram and density of states of  $\text{NH}_4(\text{TiO})((\text{P}_{0.56}\text{As}_{0.44})\text{O}_4)$ .

**Table S22.** Cell parameters of  $\text{NH}_4(\text{TiO})((\text{P}_{0.56}\text{As}_{0.44})\text{O}_4)$ , ICSD is the ICSD Collection Code, STRU is the chemical formula. The  $a$ ,  $b$ ,  $c$  (Å) and  $\alpha$ ,  $\beta$ ,  $\gamma$  (°) are unit cell parameters.  $V$  (Å<sup>3</sup>) is the cell volume and Structure parameters of  $\text{NH}_4(\text{TiO})((\text{P}_{0.56}\text{As}_{0.44})\text{O}_4)$ .

| ICSD  | STRU                                                                   | $a$   | $b$  | $c$   | $\alpha$ | $\beta$ | $\gamma$ | $V$    |
|-------|------------------------------------------------------------------------|-------|------|-------|----------|---------|----------|--------|
| 80023 | $\text{NH}_4(\text{TiO})((\text{P}_{0.56}\text{As}_{0.44})\text{O}_4)$ | 13.20 | 6.71 | 10.85 | 90.14    | 89.78   | 89.61    | 960.44 |

| NO. | E   | x       | y        | z       | NO. | E   | x       | y       | z       |
|-----|-----|---------|----------|---------|-----|-----|---------|---------|---------|
| 1   | N1  | 0.88774 | 0.71587  | 0.31546 | 53  | O21 | 0.71821 | 0.43178 | 0.39075 |
| 2   | N2  | 0.12346 | 0.28389  | 0.82584 | 54  | O22 | 0.27981 | 0.55891 | 0.88802 |
| 3   | N3  | 0.62426 | 0.21658  | 0.82579 | 55  | O23 | 0.77540 | 0.94065 | 0.89126 |
| 4   | N4  | 0.37497 | 0.78214  | 0.32681 | 56  | O24 | 0.22084 | 0.05981 | 0.38851 |
| 5   | N5  | 0.59852 | 0.82738  | 0.07115 | 57  | O25 | 0.61167 | 0.18220 | 0.54991 |
| 6   | N6  | 0.39689 | 0.18524  | 0.56125 | 58  | O26 | 0.38689 | 0.81103 | 0.04752 |
| 7   | N7  | 0.89556 | 0.31096  | 0.56422 | 59  | O27 | 0.88694 | 0.68920 | 0.04685 |
| 8   | N8  | 0.10268 | 0.68907  | 0.05905 | 60  | O28 | 0.11323 | 0.31289 | 0.54924 |
| 9   | Ti1 | 0.86875 | -0.00025 | 0.00305 | 61  | O29 | 0.60917 | 0.79118 | 0.48616 |
| 10  | Ti2 | 0.13092 | 0.00234  | 0.50492 | 62  | O30 | 0.38882 | 0.20174 | 0.98325 |
| 11  | Ti3 | 0.62768 | 0.49295  | 0.50486 | 63  | O31 | 0.88806 | 0.29826 | 0.98338 |
| 12  | Ti4 | 0.37057 | 0.49945  | 0.00309 | 64  | O32 | 0.11282 | 0.70468 | 0.48539 |
| 13  | Ti5 | 0.74324 | 0.23277  | 0.25377 | 65  | O33 | 0.75938 | 0.94550 | 0.62877 |
| 14  | Ti6 | 0.25742 | 0.76595  | 0.75109 | 66  | O34 | 0.24027 | 0.04923 | 0.13004 |
| 15  | Ti7 | 0.75506 | 0.72955  | 0.75043 | 67  | O35 | 0.74120 | 0.45480 | 0.13327 |
| 16  | Ti8 | 0.24320 | 0.26806  | 0.25080 | 68  | O36 | 0.26008 | 0.54725 | 0.63077 |
| 17  | As1 | 0.68109 | 0.98581  | 0.51282 | 69  | O37 | 0.75077 | 0.02464 | 0.38913 |
| 18  | As2 | 0.31739 | 0.00773  | 0.01256 | 70  | O38 | 0.24541 | 0.96395 | 0.89208 |
| 19  | As3 | 0.81670 | 0.49380  | 0.01394 | 71  | O39 | 0.74405 | 0.53816 | 0.89397 |
| 20  | As4 | 0.18284 | 0.50745  | 0.51388 | 72  | O40 | 0.25491 | 0.46239 | 0.39251 |
| 21  | As5 | 0.99837 | 0.16050  | 0.26160 | 73  | H1  | 0.82437 | 0.79432 | 0.34604 |
| 22  | As6 | 0.00149 | 0.84099  | 0.76034 | 74  | H2  | 0.88324 | 0.56447 | 0.33188 |

|    |     |         |         |         |     |     |         |         |         |
|----|-----|---------|---------|---------|-----|-----|---------|---------|---------|
| 23 | As7 | 0.50282 | 0.65846 | 0.76122 | 75  | H3  | 0.95016 | 0.78192 | 0.35600 |
| 24 | As8 | 0.49657 | 0.33849 | 0.25963 | 76  | H4  | 0.89247 | 0.73279 | 0.22047 |
| 25 | P1  | 0.68109 | 0.98581 | 0.51282 | 77  | H5  | 0.05424 | 0.28082 | 0.86945 |
| 26 | P2  | 0.31739 | 0.00773 | 0.01256 | 78  | H6  | 0.16388 | 0.15487 | 0.84935 |
| 27 | P3  | 0.81670 | 0.49380 | 0.01394 | 79  | H7  | 0.16698 | 0.40583 | 0.85102 |
| 28 | P4  | 0.18284 | 0.50745 | 0.51388 | 80  | H8  | 0.11304 | 0.28741 | 0.73120 |
| 29 | P5  | 0.99837 | 0.16050 | 0.26160 | 81  | H9  | 0.55511 | 0.21600 | 0.86941 |
| 30 | P6  | 0.00149 | 0.84099 | 0.76034 | 82  | H10 | 0.67023 | 0.09637 | 0.85081 |
| 31 | P7  | 0.50282 | 0.65846 | 0.76122 | 83  | H11 | 0.66226 | 0.34701 | 0.85004 |
| 32 | P8  | 0.49657 | 0.33849 | 0.25963 | 84  | H12 | 0.61373 | 0.21258 | 0.73118 |
| 33 | O1  | 0.98732 | 0.01272 | 0.14360 | 85  | H13 | 0.32993 | 0.90404 | 0.35157 |
| 34 | O2  | 0.01323 | 0.99197 | 0.64383 | 86  | H14 | 0.33553 | 0.65289 | 0.35050 |
| 35 | O3  | 0.51267 | 0.50313 | 0.64618 | 87  | H15 | 0.44371 | 0.78013 | 0.37086 |
| 36 | O4  | 0.48456 | 0.49107 | 0.14451 | 88  | H16 | 0.38632 | 0.78459 | 0.23234 |
| 37 | O5  | 0.01397 | 0.02819 | 0.38850 | 89  | H17 | 0.52169 | 0.83141 | 0.04857 |
| 38 | O6  | 0.98532 | 0.97080 | 0.88829 | 90  | H18 | 0.61192 | 0.68956 | 0.11013 |
| 39 | O7  | 0.48785 | 0.53410 | 0.89110 | 91  | H19 | 0.61432 | 0.94125 | 0.13237 |
| 40 | O8  | 0.51189 | 0.46308 | 0.38944 | 92  | H20 | 0.64360 | 0.84125 | 0.99371 |
| 41 | O9  | 0.89524 | 0.29688 | 0.28772 | 93  | H21 | 0.34194 | 0.09578 | 0.60175 |
| 42 | O10 | 0.10512 | 0.70624 | 0.78228 | 94  | H22 | 0.46916 | 0.12514 | 0.56629 |
| 43 | O11 | 0.60463 | 0.79589 | 0.77823 | 95  | H23 | 0.40182 | 0.32388 | 0.60318 |
| 44 | O12 | 0.39424 | 0.20210 | 0.28072 | 96  | H24 | 0.37982 | 0.20715 | 0.46928 |
| 45 | O13 | 0.09551 | 0.31194 | 0.24228 | 97  | H25 | 0.83651 | 0.39294 | 0.60425 |
| 46 | O14 | 0.90372 | 0.69100 | 0.74045 | 98  | H26 | 0.90770 | 0.17312 | 0.60538 |
| 47 | O15 | 0.40377 | 0.80807 | 0.74043 | 99  | H27 | 0.96388 | 0.38379 | 0.56988 |
| 48 | O16 | 0.59528 | 0.18733 | 0.23669 | 100 | H28 | 0.88010 | 0.28701 | 0.47197 |
| 49 | O17 | 0.72350 | 0.53758 | 0.63920 | 101 | H29 | 0.03125 | 0.62734 | 0.06413 |
| 50 | O18 | 0.27470 | 0.45669 | 0.13693 | 102 | H30 | 0.15838 | 0.60072 | 0.09981 |
| 51 | O19 | 0.77965 | 0.04905 | 0.13924 | 103 | H31 | 0.09577 | 0.82824 | 0.10032 |
| 52 | O20 | 0.22504 | 0.95636 | 0.63737 | 104 | H32 | 0.11976 | 0.71011 | 0.96675 |

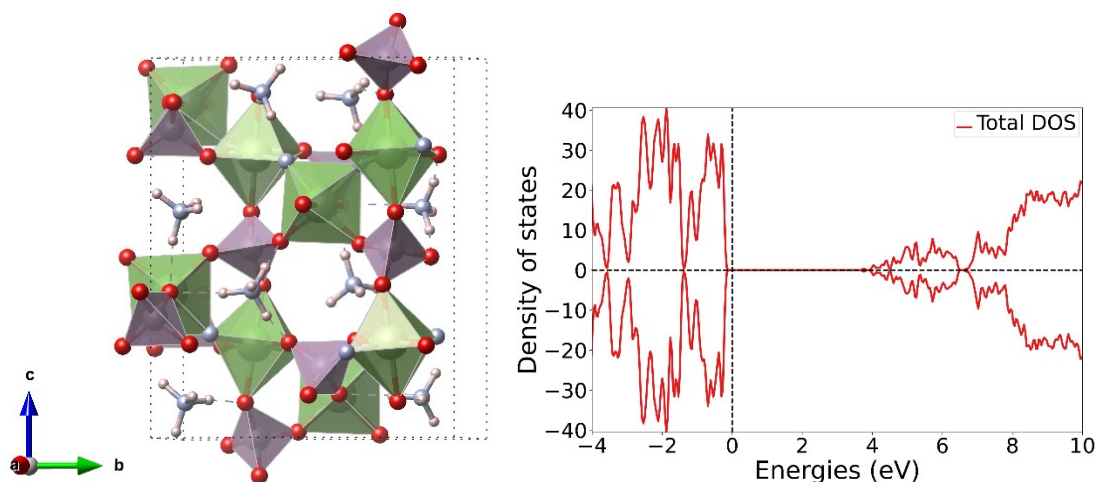

**Figure S17.** Structure diagram and density of states of  $\text{NH}_4\text{GaF}(\text{PO}_4)$ .

**Table S23.** Cell parameters of  $\text{NH}_4\text{GaF}(\text{PO}_4)$ , ICSD is the ICSD Collection Code, STRU is the chemical formula. The  $a$ ,  $b$ ,  $c$  (Å) and  $\alpha$ ,  $\beta$ ,  $\gamma$  ( $^\circ$ ) are unit cell parameters.  $V$  (Å<sup>3</sup>) is the cell volume and Structure parameters of  $\text{NH}_4\text{GaF}(\text{PO}_4)$ .

| ICSD  | STRU                                 | $a$  | $b$   | $c$   | $\alpha$ | $\beta$ | $\gamma$ | $V$    |
|-------|--------------------------------------|------|-------|-------|----------|---------|----------|--------|
| 80893 | $\text{NH}_4\text{GaF}(\text{PO}_4)$ | 6.47 | 10.60 | 13.06 | 89.86    | 89.39   | 89.86    | 895.06 |

| NO. | E   | x       | y       | z        | NO. | E   | x       | y       | z       |
|-----|-----|---------|---------|----------|-----|-----|---------|---------|---------|
| 1   | Ga1 | 0.00600 | 0.01571 | 0.88451  | 49  | N1  | 0.71348 | 0.33701 | 0.90938 |
| 2   | Ga2 | 0.00191 | 0.51444 | 0.11601  | 50  | N2  | 0.28640 | 0.81662 | 0.10800 |
| 3   | Ga3 | 0.51849 | 0.50809 | 0.61302  | 51  | N3  | 0.21488 | 0.81280 | 0.60945 |
| 4   | Ga4 | 0.48590 | 0.00978 | 0.38561  | 52  | N4  | 0.78493 | 0.31127 | 0.38758 |
| 5   | Ga5 | 0.25001 | 0.26378 | 0.74773  | 53  | N5  | 0.83881 | 0.08201 | 0.59625 |
| 6   | Ga6 | 0.75571 | 0.76299 | 0.25119  | 54  | N6  | 0.16369 | 0.57912 | 0.40612 |
| 7   | Ga7 | 0.74592 | 0.76389 | 0.75145  | 55  | N7  | 0.31961 | 0.58536 | 0.89603 |
| 8   | Ga8 | 0.25564 | 0.26250 | 0.24848  | 56  | N8  | 0.65673 | 0.07633 | 0.09363 |
| 9   | P1  | 0.17098 | 0.26289 | 0.00219  | 57  | O1  | 0.01547 | 0.15268 | 0.98550 |
| 10  | P2  | 0.83461 | 0.76143 | -0.00317 | 58  | O2  | 0.98310 | 0.64673 | 0.01208 |
| 11  | P3  | 0.67007 | 0.75845 | 0.49614  | 59  | O3  | 0.53273 | 0.63990 | 0.51056 |
| 12  | P4  | 0.33207 | 0.25880 | 0.50255  | 60  | O4  | 0.46946 | 0.14004 | 0.48861 |
| 13  | P5  | 0.00055 | 0.51355 | 0.68484  | 61  | O5  | 0.04134 | 0.38342 | 0.01989 |
| 14  | P6  | 0.00001 | 0.01457 | 0.31435  | 62  | O6  | 0.97665 | 0.87779 | 0.97811 |
| 15  | P7  | 0.49830 | 0.01563 | 0.81556  | 63  | O7  | 0.51929 | 0.87111 | 0.47727 |
| 16  | P8  | 0.50679 | 0.51526 | 0.18403  | 64  | O8  | 0.48114 | 0.37215 | 0.51956 |
| 17  | H1  | 0.79729 | 0.37426 | 0.84860  | 65  | O9  | 0.30336 | 0.28333 | 0.90318 |
| 18  | H2  | 0.56035 | 0.31691 | 0.89239  | 66  | O10 | 0.70526 | 0.78249 | 0.09581 |
| 19  | H3  | 0.71985 | 0.39632 | 0.97177  | 67  | O11 | 0.79672 | 0.78471 | 0.59395 |
| 20  | H4  | 0.78760 | 0.25433 | 0.92981  | 68  | O12 | 0.20411 | 0.28423 | 0.40470 |
| 21  | H5  | 0.20294 | 0.84845 | 0.04539  | 69  | O13 | 0.31112 | 0.23785 | 0.09595 |
| 22  | H6  | 0.21806 | 0.85549 | 0.17227  | 70  | O14 | 0.69207 | 0.73964 | 0.90401 |
| 23  | H7  | 0.44310 | 0.83426 | 0.10162  | 71  | O15 | 0.81581 | 0.74389 | 0.40156 |
| 24  | H8  | 0.27576 | 0.71885 | 0.11355  | 72  | O16 | 0.18760 | 0.24499 | 0.59766 |

|    |     |         |         |         |    |     |         |         |         |
|----|-----|---------|---------|---------|----|-----|---------|---------|---------|
| 25 | H9  | 0.30619 | 0.84509 | 0.54847 | 73 | O17 | 0.19747 | 0.54130 | 0.61726 |
| 26 | H10 | 0.05756 | 0.82568 | 0.59840 | 74 | O18 | 0.80510 | 0.04147 | 0.38358 |
| 27 | H11 | 0.26775 | 0.85500 | 0.67488 | 75 | O19 | 0.68971 | 0.04165 | 0.88438 |
| 28 | H12 | 0.23506 | 0.71611 | 0.61673 | 76 | O20 | 0.31503 | 0.54817 | 0.11791 |
| 29 | H13 | 0.73012 | 0.35203 | 0.32170 | 77 | O21 | 0.81747 | 0.48243 | 0.61433 |
| 30 | H14 | 0.69356 | 0.34409 | 0.44823 | 78 | O22 | 0.18629 | 0.98389 | 0.38331 |
| 31 | H15 | 0.94159 | 0.32551 | 0.39827 | 79 | O23 | 0.30730 | 0.99006 | 0.88503 |
| 32 | H16 | 0.76739 | 0.21429 | 0.38153 | 80 | O24 | 0.69702 | 0.48741 | 0.11339 |
| 33 | H17 | 0.82904 | 0.05390 | 0.52000 | 81 | O25 | 0.95422 | 0.63152 | 0.75243 |
| 34 | H18 | 0.69740 | 0.11769 | 0.61952 | 82 | O26 | 0.04369 | 0.13230 | 0.24553 |
| 35 | H19 | 0.95586 | 0.14893 | 0.60243 | 83 | O27 | 0.45844 | 0.13025 | 0.74297 |
| 36 | H20 | 0.87229 | 0.00671 | 0.64284 | 84 | O28 | 0.55346 | 0.62769 | 0.25726 |
| 37 | H21 | 0.04482 | 0.64469 | 0.39716 | 85 | O29 | 0.04667 | 0.40198 | 0.75927 |
| 38 | H22 | 0.16941 | 0.55228 | 0.48307 | 86 | O30 | 0.95434 | 0.90231 | 0.24126 |
| 39 | H23 | 0.30563 | 0.61613 | 0.38579 | 87 | O31 | 0.54241 | 0.89933 | 0.74537 |
| 40 | H24 | 0.13755 | 0.50244 | 0.36030 | 88 | O32 | 0.46028 | 0.39802 | 0.25283 |
| 41 | H25 | 0.30555 | 0.60881 | 0.82030 | 89 | F1  | 0.02463 | 0.14425 | 0.77558 |
| 42 | H26 | 0.19006 | 0.61781 | 0.93736 | 90 | F2  | 0.98193 | 0.64364 | 0.22396 |
| 43 | H27 | 0.45552 | 0.62611 | 0.92082 | 91 | F3  | 0.52614 | 0.64124 | 0.72151 |
| 44 | H28 | 0.32249 | 0.48851 | 0.90226 | 92 | F4  | 0.47563 | 0.14044 | 0.27604 |
| 45 | H29 | 0.65991 | 0.04635 | 0.01732 | 93 | F5  | 0.47263 | 0.39063 | 0.72987 |
| 46 | H30 | 0.53659 | 0.14148 | 0.10180 | 94 | F6  | 0.53417 | 0.89254 | 0.26729 |
| 47 | H31 | 0.79830 | 0.11586 | 0.10914 | 95 | F7  | 0.96434 | 0.89516 | 0.76703 |
| 48 | H32 | 0.63423 | 0.00259 | 0.14353 | 96 | F8  | 0.03874 | 0.39453 | 0.23233 |

---

---



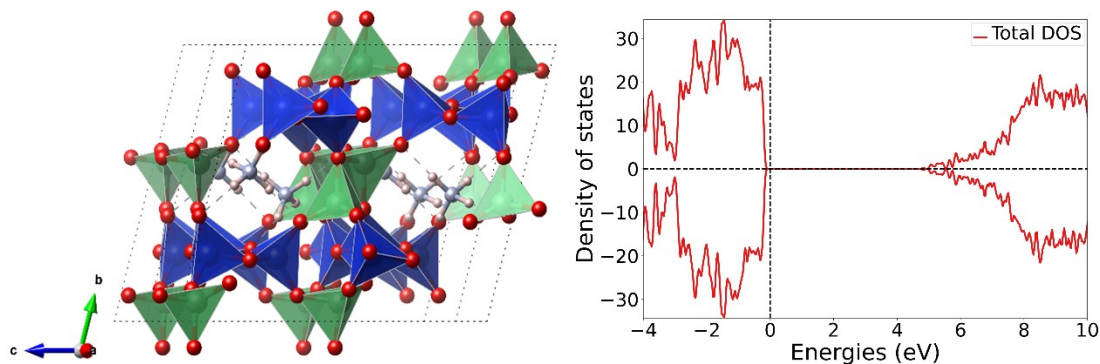

**Figure S18.** Structure diagram and density of states of  $(\text{NH}_4)_2(\text{Be}_2\text{Si}_3\text{O}_9)$ .

**Table S24.** Cell parameters of  $(\text{NH}_4)_2(\text{Be}_2\text{Si}_3\text{O}_9)$ , ICSD is the ICSD Collection Code, STRU is the chemical formula. The  $a$ ,  $b$ ,  $c$  (Å) and  $\alpha$ ,  $\beta$ ,  $\gamma$  ( $^\circ$ ) are unit cell parameters.  $V$  (Å<sup>3</sup>) is the cell volume and Structure parameters of  $(\text{NH}_4)_2(\text{Be}_2\text{Si}_3\text{O}_9)$ .

| ICSD  | STRU                                                | a    | b     | c     | $\alpha$ | $\beta$ | $\gamma$ | V      |
|-------|-----------------------------------------------------|------|-------|-------|----------|---------|----------|--------|
| 82398 | $(\text{NH}_4)_2(\text{Be}_2\text{Si}_3\text{O}_9)$ | 7.03 | 10.50 | 12.23 | 105.11   | 90.00   | 90.00    | 871.74 |

| NO. | E    | x       | y       | z       | NO. | E   | x       | y       | z       |
|-----|------|---------|---------|---------|-----|-----|---------|---------|---------|
| 1   | Be1  | 0.08635 | 0.57474 | 0.96509 | 49  | H29 | 0.29600 | 0.01026 | 0.85071 |
| 2   | Be2  | 0.58633 | 0.42511 | 0.53498 | 50  | H30 | 0.52926 | 0.00601 | 0.88938 |
| 3   | Be3  | 0.91337 | 0.42506 | 0.03495 | 51  | H31 | 0.44564 | 0.89569 | 0.77210 |
| 4   | Be4  | 0.41345 | 0.57472 | 0.46500 | 52  | H32 | 0.37027 | 0.89337 | 0.90875 |
| 5   | Be5  | 0.06534 | 0.92851 | 0.05270 | 53  | N1  | 0.56953 | 0.54141 | 0.84243 |
| 6   | Be6  | 0.56529 | 0.07136 | 0.44725 | 54  | N2  | 0.06963 | 0.45842 | 0.65767 |
| 7   | Be7  | 0.93439 | 0.07134 | 0.94721 | 55  | N3  | 0.42990 | 0.45853 | 0.15753 |
| 8   | Be8  | 0.43446 | 0.92849 | 0.55280 | 56  | N4  | 0.92980 | 0.54136 | 0.34248 |
| 9   | Si1  | 0.81019 | 0.73263 | 0.12379 | 57  | N5  | 0.08976 | 0.95006 | 0.35374 |
| 10  | Si2  | 0.31011 | 0.26725 | 0.37623 | 58  | N6  | 0.58946 | 0.05018 | 0.14590 |
| 11  | Si3  | 0.18958 | 0.26722 | 0.87622 | 59  | N7  | 0.91050 | 0.04993 | 0.64586 |
| 12  | Si4  | 0.68964 | 0.73254 | 0.62377 | 60  | N8  | 0.41041 | 0.94946 | 0.85398 |
| 13  | Si5  | 0.61712 | 0.24311 | 0.91578 | 61  | O1  | 0.92085 | 0.59324 | 0.06973 |
| 14  | Si6  | 0.11722 | 0.75661 | 0.58418 | 62  | O2  | 0.42096 | 0.40658 | 0.43024 |
| 15  | Si7  | 0.38263 | 0.75671 | 0.08425 | 63  | O3  | 0.07889 | 0.40660 | 0.93029 |
| 16  | Si8  | 0.88256 | 0.24326 | 0.41582 | 64  | O4  | 0.57881 | 0.59322 | 0.56973 |
| 17  | Si9  | 0.47075 | 0.23274 | 0.67800 | 65  | O5  | 0.97046 | 0.90591 | 0.92092 |
| 18  | Si10 | 0.97075 | 0.76704 | 0.82201 | 66  | O6  | 0.47044 | 0.09392 | 0.57905 |
| 19  | Si11 | 0.52913 | 0.76713 | 0.32205 | 67  | O7  | 0.02922 | 0.09391 | 0.07902 |
| 20  | Si12 | 0.02899 | 0.23274 | 0.17798 | 68  | O8  | 0.52934 | 0.90593 | 0.42102 |
| 21  | H1   | 0.44885 | 0.57131 | 0.89241 | 69  | O9  | 0.62666 | 0.22259 | 0.77700 |
| 22  | H2   | 0.64092 | 0.62233 | 0.82962 | 70  | O10 | 0.12665 | 0.77711 | 0.72297 |
| 23  | H3   | 0.53863 | 0.47784 | 0.76258 | 71  | O11 | 0.37321 | 0.77726 | 0.22304 |
| 24  | H4   | 0.65313 | 0.49246 | 0.88901 | 72  | O12 | 0.87308 | 0.22268 | 0.27702 |
| 25  | H5   | 0.15315 | 0.50726 | 0.61096 | 73  | O13 | 0.76080 | 0.73848 | 0.75567 |

|    |     |         |         |         |    |     |         |         |         |
|----|-----|---------|---------|---------|----|-----|---------|---------|---------|
| 26 | H6  | 0.14093 | 0.37744 | 0.67040 | 74 | O14 | 0.26081 | 0.26127 | 0.74434 |
| 27 | H7  | 0.94876 | 0.42861 | 0.60782 | 75 | O15 | 0.23893 | 0.26122 | 0.24432 |
| 28 | H8  | 0.03901 | 0.52203 | 0.73754 | 76 | O16 | 0.73909 | 0.73873 | 0.25572 |
| 29 | H9  | 0.46066 | 0.52209 | 0.23740 | 77 | O17 | 0.61381 | 0.74839 | 0.05341 |
| 30 | H10 | 0.55074 | 0.42855 | 0.10771 | 78 | O18 | 0.11374 | 0.25163 | 0.44665 |
| 31 | H11 | 0.34664 | 0.50753 | 0.11080 | 79 | O19 | 0.38594 | 0.25142 | 0.94661 |
| 32 | H12 | 0.35831 | 0.37765 | 0.17023 | 80 | O20 | 0.88601 | 0.74824 | 0.55337 |
| 33 | H13 | 0.85855 | 0.62233 | 0.32968 | 81 | O21 | 0.94235 | 0.86093 | 0.13280 |
| 34 | H14 | 0.05058 | 0.57119 | 0.39240 | 82 | O22 | 0.44210 | 0.13888 | 0.36718 |
| 35 | H15 | 0.96057 | 0.47774 | 0.26265 | 83 | O23 | 0.05737 | 0.13894 | 0.86714 |
| 36 | H16 | 0.84619 | 0.49252 | 0.38915 | 84 | O24 | 0.55758 | 0.86088 | 0.63284 |
| 37 | H17 | 0.20430 | 0.01088 | 0.35070 | 85 | O25 | 0.70720 | 0.38233 | 0.98465 |
| 38 | H18 | 0.05415 | 0.89671 | 0.27176 | 86 | O26 | 0.20724 | 0.61738 | 0.51527 |
| 39 | H19 | 0.97106 | 0.00650 | 0.38950 | 87 | O27 | 0.29255 | 0.61747 | 0.01541 |
| 40 | H20 | 0.12989 | 0.89342 | 0.40803 | 88 | O28 | 0.79253 | 0.38248 | 0.48470 |
| 41 | H21 | 0.62970 | 0.10605 | 0.09095 | 89 | O29 | 0.71011 | 0.11601 | 0.94926 |
| 42 | H22 | 0.70368 | 0.98922 | 0.14917 | 90 | O30 | 0.21025 | 0.88370 | 0.55072 |
| 43 | H23 | 0.47038 | 0.99379 | 0.11068 | 91 | O31 | 0.28958 | 0.88376 | 0.05073 |
| 44 | H24 | 0.55457 | 0.10418 | 0.22773 | 92 | O32 | 0.78953 | 0.11617 | 0.44929 |
| 45 | H25 | 0.94558 | 0.10364 | 0.72778 | 93 | O33 | 0.51726 | 0.36025 | 0.63275 |
| 46 | H26 | 0.02949 | 0.99355 | 0.61042 | 94 | O34 | 0.01733 | 0.63960 | 0.86733 |
| 47 | H27 | 0.87024 | 0.10613 | 0.59121 | 95 | O35 | 0.48266 | 0.63958 | 0.36725 |
| 48 | H28 | 0.79621 | 0.98896 | 0.64898 | 96 | O36 | 0.98250 | 0.36024 | 0.13272 |

---

---

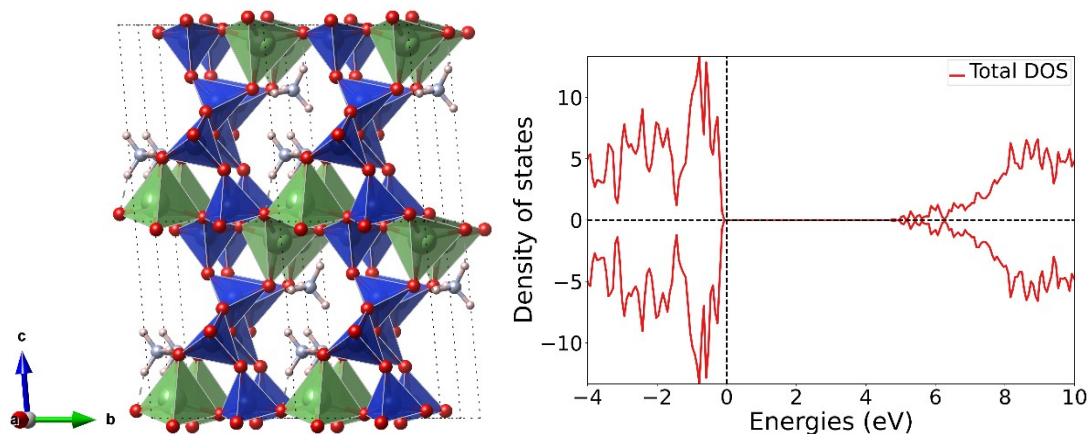

**Figure S19.** Structure diagram and density of states of  $\text{NH}_4\text{Li}(\text{Si}_2\text{O}_5)$ .

**Table S25.** Cell parameters of  $\text{NH}_4\text{Li}(\text{Si}_2\text{O}_5)$ , ICSD is the ICSD Collection Code, STRU is the chemical formula. The  $a$ ,  $b$ ,  $c$  (Å) and  $\alpha$ ,  $\beta$ ,  $\gamma$  (°) are unit cell parameters.  $V$  (Å<sup>3</sup>) is the cell volume and Structure parameters of  $\text{NH}_4\text{Li}(\text{Si}_2\text{O}_5)$ .

| ICSD  | STRU                                          | $a$  | $b$  | $c$  | $\alpha$ | $\beta$ | $\gamma$ | $V$    |
|-------|-----------------------------------------------|------|------|------|----------|---------|----------|--------|
| 82457 | $\text{NH}_4\text{Li}(\text{Si}_2\text{O}_5)$ | 4.82 | 6.30 | 8.45 | 94.93    | 89.99   | 90.03    | 255.75 |

| NO. | E   | x       | y       | z       | NO. | E   | x       | y       | z       |
|-----|-----|---------|---------|---------|-----|-----|---------|---------|---------|
| 1   | Li1 | 0.77635 | 0.12186 | 0.09068 | 14  | H8  | 0.87577 | 0.10042 | 0.77343 |
| 2   | Li2 | 0.27668 | 0.87720 | 0.90775 | 15  | N1  | 0.33145 | 0.98911 | 0.33823 |
| 3   | Si1 | 0.87991 | 0.44651 | 0.39070 | 16  | N2  | 0.83025 | 0.01133 | 0.66690 |
| 4   | Si2 | 0.37981 | 0.55250 | 0.60553 | 17  | O1  | 0.70752 | 0.51471 | 0.55571 |
| 5   | Si3 | 0.74136 | 0.62449 | 0.07097 | 18  | O2  | 0.20758 | 0.48353 | 0.44079 |
| 6   | Si4 | 0.24139 | 0.37552 | 0.92589 | 19  | O3  | 0.82754 | 0.20253 | 0.32371 |
| 7   | H1  | 0.14159 | 0.07177 | 0.32893 | 20  | O4  | 0.32712 | 0.79680 | 0.67212 |
| 8   | H2  | 0.50366 | 0.09386 | 0.34759 | 21  | O5  | 0.80751 | 0.61983 | 0.26190 |
| 9   | H3  | 0.37110 | 0.89146 | 0.23556 | 22  | O6  | 0.30733 | 0.37980 | 0.73489 |
| 10  | H4  | 0.32552 | 0.90131 | 0.43591 | 23  | O7  | 0.59960 | 0.84517 | 0.03734 |
| 11  | H5  | 0.82352 | 0.10795 | 0.57466 | 24  | O8  | 0.09880 | 0.15470 | 0.95929 |
| 12  | H6  | 0.00019 | 0.90574 | 0.65110 | 25  | O9  | 0.54391 | 0.41105 | 0.02033 |
| 13  | H7  | 0.63969 | 0.92870 | 0.67339 | 26  | O10 | 0.04408 | 0.58878 | 0.97654 |

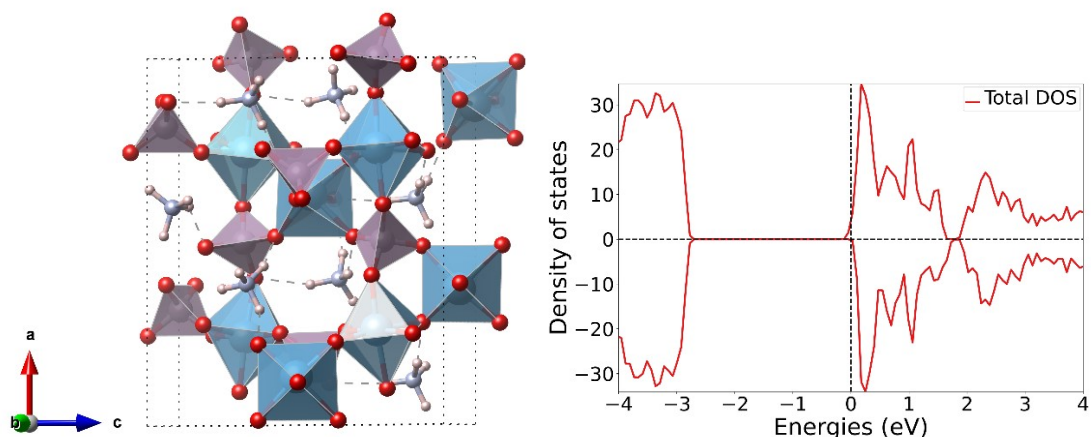

**Figure S20.** Structure diagram and density of states of  $\text{NH}_4(\text{Ti}_{0.936}\text{Sn}_{0.064})\text{O}(\text{PO}_4)$ .

**Table S26.** Cell parameters of  $\text{NH}_4(\text{Ti}_{0.936}\text{Sn}_{0.064})\text{O}(\text{PO}_4)$ , ICSD is the ICSD Collection Code, STRU is the chemical formula. The  $a$ ,  $b$ ,  $c$  (Å) and  $\alpha$ ,  $\beta$ ,  $\gamma$  (°) are unit cell parameters.  $V$  (Å<sup>3</sup>) is the cell volume and Structure parameters of  $\text{NH}_4(\text{Ti}_{0.936}\text{Sn}_{0.064})\text{O}(\text{PO}_4)$ .

| ICSD  | STRU                                                                   | $a$   | $b$  | $c$   | $\alpha$ | $\beta$ | $\gamma$ | $V$    |
|-------|------------------------------------------------------------------------|-------|------|-------|----------|---------|----------|--------|
| 91534 | $\text{NH}_4(\text{Ti}_{0.936}\text{Sn}_{0.064})\text{O}(\text{PO}_4)$ | 13.02 | 6.56 | 10.69 | 89.91    | 89.56   | 89.83    | 913.43 |

| NO. | E   | x       | y       | z       | NO. | E   | x       | y       | z       |
|-----|-----|---------|---------|---------|-----|-----|---------|---------|---------|
| 1   | N1  | 0.59392 | 0.82811 | 0.06769 | 53  | O21 | 0.61624 | 0.80518 | 0.48394 |
| 2   | N2  | 0.39850 | 0.18572 | 0.56030 | 54  | O22 | 0.38524 | 0.19341 | 0.97822 |
| 3   | N3  | 0.89906 | 0.31129 | 0.56097 | 55  | O23 | 0.88348 | 0.30652 | 0.98050 |
| 4   | N4  | 0.10004 | 0.68286 | 0.05771 | 56  | O24 | 0.11561 | 0.69487 | 0.48305 |
| 5   | N5  | 0.88942 | 0.70126 | 0.31464 | 57  | O25 | 0.75523 | 0.95182 | 0.62364 |
| 6   | N6  | 0.12072 | 0.28310 | 0.82117 | 58  | O26 | 0.24693 | 0.04883 | 0.12274 |
| 7   | N7  | 0.61815 | 0.21718 | 0.82333 | 59  | O27 | 0.74554 | 0.45308 | 0.12544 |
| 8   | N8  | 0.38500 | 0.79684 | 0.31519 | 60  | O28 | 0.25486 | 0.54686 | 0.62205 |
| 9   | Ti1 | 0.86866 | 0.00119 | 0.99776 | 61  | O29 | 0.75137 | 0.03932 | 0.39394 |
| 10  | Ti2 | 0.13087 | 0.99510 | 0.50324 | 62  | O30 | 0.24724 | 0.96212 | 0.89261 |
| 11  | Ti3 | 0.62895 | 0.50187 | 0.49992 | 63  | O31 | 0.74532 | 0.53974 | 0.89524 |
| 12  | Ti4 | 0.36836 | 0.49436 | 0.99943 | 64  | O32 | 0.25027 | 0.45998 | 0.39209 |
| 13  | Ti5 | 0.74619 | 0.23247 | 0.25092 | 65  | O33 | 0.72140 | 0.44888 | 0.38638 |
| 14  | Ti6 | 0.25806 | 0.76101 | 0.74935 | 66  | O34 | 0.27811 | 0.55155 | 0.88005 |
| 15  | Ti7 | 0.75363 | 0.73226 | 0.74757 | 67  | O35 | 0.77252 | 0.94800 | 0.88898 |
| 16  | Ti8 | 0.24238 | 0.26319 | 0.25218 | 68  | O36 | 0.21891 | 0.05361 | 0.38123 |
| 17  | Sn1 | 0.86866 | 0.00119 | 0.99776 | 69  | O37 | 0.72474 | 0.53878 | 0.63643 |
| 18  | Sn2 | 0.13087 | 0.99510 | 0.50324 | 70  | O38 | 0.27591 | 0.45996 | 0.13226 |
| 19  | Sn3 | 0.62895 | 0.50187 | 0.49992 | 71  | O39 | 0.77850 | 0.04379 | 0.13837 |
| 20  | Sn4 | 0.36836 | 0.49436 | 0.99943 | 72  | O40 | 0.22533 | 0.95811 | 0.63185 |
| 21  | Sn5 | 0.74619 | 0.23247 | 0.25092 | 73  | H1  | 0.51741 | 0.84599 | 0.04064 |
| 22  | Sn6 | 0.25806 | 0.76101 | 0.74935 | 74  | H2  | 0.59744 | 0.68383 | 0.10659 |

|    |     |          |         |         |     |     |         |         |         |
|----|-----|----------|---------|---------|-----|-----|---------|---------|---------|
| 23 | Sn7 | 0.75363  | 0.73226 | 0.74757 | 75  | H3  | 0.61330 | 0.93904 | 0.13140 |
| 24 | Sn8 | 0.24238  | 0.26319 | 0.25218 | 76  | H4  | 0.64317 | 0.83522 | 0.99189 |
| 25 | P1  | -0.00059 | 0.15465 | 0.25685 | 77  | H5  | 0.33772 | 0.10305 | 0.59908 |
| 26 | P2  | -0.00008 | 0.84099 | 0.75706 | 78  | H6  | 0.46708 | 0.10755 | 0.56486 |
| 27 | P3  | 0.50169  | 0.65882 | 0.75727 | 79  | H7  | 0.41127 | 0.32407 | 0.60470 |
| 28 | P4  | 0.49965  | 0.34175 | 0.25601 | 80  | H8  | 0.38366 | 0.21591 | 0.46730 |
| 29 | P5  | 0.68331  | 0.99526 | 0.51044 | 81  | H9  | 0.84022 | 0.39585 | 0.60226 |
| 30 | P6  | 0.31667  | 0.00515 | 0.00726 | 82  | H10 | 0.91231 | 0.17221 | 0.60495 |
| 31 | P7  | 0.81542  | 0.49583 | 0.00934 | 83  | H11 | 0.96872 | 0.38569 | 0.56199 |
| 32 | P8  | 0.18287  | 0.50407 | 0.50932 | 84  | H12 | 0.88089 | 0.28133 | 0.46904 |
| 33 | O1  | 0.98666  | 0.01592 | 0.14245 | 85  | H13 | 0.03241 | 0.60321 | 0.06629 |
| 34 | O2  | 0.01219  | 0.98293 | 0.64316 | 86  | H14 | 0.16193 | 0.60342 | 0.09588 |
| 35 | O3  | 0.51285  | 0.51448 | 0.64429 | 87  | H15 | 0.08651 | 0.82294 | 0.10024 |
| 36 | O4  | 0.48682  | 0.48093 | 0.14198 | 88  | H16 | 0.11287 | 0.70874 | 0.96324 |
| 37 | O5  | 0.01322  | 0.02645 | 0.37813 | 89  | H17 | 0.81814 | 0.69978 | 0.35644 |
| 38 | O6  | 0.98190  | 0.97038 | 0.87795 | 90  | H18 | 0.91591 | 0.55171 | 0.31294 |
| 39 | O7  | 0.48564  | 0.53603 | 0.88001 | 91  | H19 | 0.93853 | 0.80431 | 0.35787 |
| 40 | O8  | 0.51431  | 0.47194 | 0.37722 | 92  | H20 | 0.88049 | 0.74499 | 0.22245 |
| 41 | O9  | 0.90117  | 0.28925 | 0.27891 | 93  | H21 | 0.04970 | 0.28479 | 0.86343 |
| 42 | O10 | 0.09843  | 0.71238 | 0.77925 | 94  | H22 | 0.15936 | 0.15011 | 0.84674 |
| 43 | O11 | 0.60038  | 0.78911 | 0.77365 | 95  | H23 | 0.16664 | 0.40499 | 0.84738 |
| 44 | O12 | 0.40265  | 0.20759 | 0.27903 | 96  | H24 | 0.11251 | 0.28713 | 0.72487 |
| 45 | O13 | 0.09287  | 0.30017 | 0.23712 | 97  | H25 | 0.54689 | 0.21349 | 0.86506 |
| 46 | O14 | 0.90421  | 0.70084 | 0.73864 | 98  | H26 | 0.66451 | 0.09470 | 0.84855 |
| 47 | O15 | 0.40661  | 0.80220 | 0.73645 | 99  | H27 | 0.65561 | 0.34964 | 0.85070 |
| 48 | O16 | 0.59516  | 0.19865 | 0.23823 | 100 | H28 | 0.61024 | 0.21672 | 0.72705 |
| 49 | O17 | 0.61577  | 0.18400 | 0.54294 | 101 | H29 | 0.31509 | 0.81220 | 0.35976 |
| 50 | O18 | 0.38371  | 0.81490 | 0.03582 | 102 | H30 | 0.43344 | 0.69502 | 0.36058 |
| 51 | O19 | 0.88214  | 0.68568 | 0.03822 | 103 | H31 | 0.41448 | 0.94355 | 0.30597 |
| 52 | O20 | 0.11542  | 0.31628 | 0.54264 | 104 | H32 | 0.37203 | 0.74248 | 0.22626 |

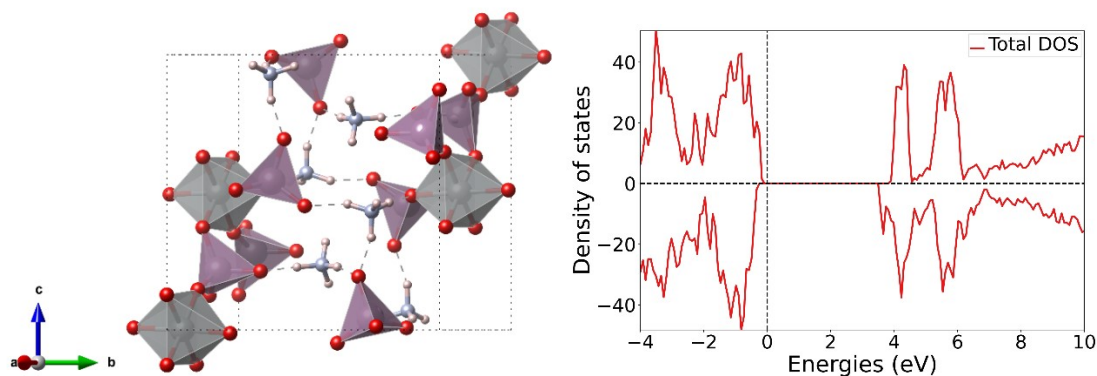

**Figure S21.** Structure diagram and density of states of  $(\text{NH}_4)_2\text{Ni}(\text{MoO}_4)_2$ .

**Table S27.** Cell parameters of  $(\text{NH}_4)_2\text{Ni}(\text{MoO}_4)_2$ , ICSD is the ICSD Collection Code, STRU is the chemical formula. The  $a, b, c$  (Å) and  $\alpha, \beta, \gamma$  ( $^\circ$ ) are unit cell parameters.  $V$  (Å<sup>3</sup>) is the cell volume and Structure parameters of  $(\text{NH}_4)_2\text{Ni}(\text{MoO}_4)_2$ .

| ICSD   | STRU                                       | a    | b     | c     | $\alpha$ | $\beta$ | $\gamma$ | V      |
|--------|--------------------------------------------|------|-------|-------|----------|---------|----------|--------|
| 200310 | $(\text{NH}_4)_2\text{Ni}(\text{MoO}_4)_2$ | 8.49 | 11.01 | 11.10 | 90.00    | 90.00   | 113.02   | 955.38 |

| NO. | E   | x       | y       | z       | NO. | E   | x       | y       | z       |
|-----|-----|---------|---------|---------|-----|-----|---------|---------|---------|
| 1   | Ni1 | 0.32546 | 0.01119 | 0.49938 | 43  | H31 | 0.68901 | 0.38612 | 0.95730 |
| 2   | Ni2 | 0.82546 | 0.01119 | 0.00062 | 44  | H32 | 0.65659 | 0.29192 | 0.83517 |
| 3   | Ni3 | 0.67457 | 0.98897 | 0.50069 | 45  | N1  | 0.02700 | 0.56866 | 0.73548 |
| 4   | Ni4 | 0.17457 | 0.98897 | 0.99931 | 46  | N2  | 0.47486 | 0.43163 | 0.23651 |
| 5   | Mo1 | 0.47384 | 0.93781 | 0.78364 | 47  | N3  | 0.97486 | 0.43163 | 0.26349 |
| 6   | Mo2 | 0.52603 | 0.06215 | 0.21623 | 48  | N4  | 0.52700 | 0.56866 | 0.76452 |
| 7   | Mo3 | 0.02603 | 0.06215 | 0.28377 | 49  | N5  | 0.14901 | 0.28781 | 0.57034 |
| 8   | Mo4 | 0.97384 | 0.93781 | 0.71636 | 50  | N6  | 0.85014 | 0.71226 | 0.43069 |
| 9   | Mo5 | 0.17226 | 0.29796 | 0.95889 | 51  | N7  | 0.35014 | 0.71226 | 0.06931 |
| 10  | Mo6 | 0.82807 | 0.70254 | 0.04173 | 52  | N8  | 0.64901 | 0.28781 | 0.92966 |
| 11  | Mo7 | 0.32807 | 0.70254 | 0.45827 | 53  | O1  | 0.49723 | 0.99949 | 0.62786 |
| 12  | Mo8 | 0.67226 | 0.29796 | 0.54111 | 54  | O2  | 0.50311 | 0.00061 | 0.37206 |
| 13  | H1  | 0.91366 | 0.48439 | 0.72830 | 55  | O3  | 0.00311 | 0.00061 | 0.12794 |
| 14  | H2  | 0.08494 | 0.57082 | 0.81652 | 56  | O4  | 0.99723 | 0.99949 | 0.87214 |
| 15  | H3  | 0.99593 | 0.65274 | 0.72838 | 57  | O5  | 0.41746 | 0.76676 | 0.78676 |
| 16  | H4  | 0.11189 | 0.56831 | 0.66688 | 58  | O6  | 0.58314 | 0.23328 | 0.21303 |
| 17  | H5  | 0.38888 | 0.43195 | 0.16875 | 59  | O7  | 0.08314 | 0.23328 | 0.28697 |
| 18  | H6  | 0.50625 | 0.34773 | 0.22844 | 60  | O8  | 0.91746 | 0.76676 | 0.71324 |
| 19  | H7  | 0.41824 | 0.42877 | 0.31822 | 61  | O9  | 0.65522 | 0.01767 | 0.87441 |
| 20  | H8  | 0.58780 | 0.51618 | 0.22904 | 62  | O10 | 0.69336 | 0.03280 | 0.14644 |
| 21  | H9  | 0.88888 | 0.43195 | 0.33125 | 63  | O11 | 0.19336 | 0.03280 | 0.35356 |
| 22  | H10 | 0.00625 | 0.34773 | 0.27156 | 64  | O12 | 0.15522 | 0.01767 | 0.62559 |
| 23  | H11 | 0.08780 | 0.51618 | 0.27096 | 65  | O13 | 0.34452 | 0.98268 | 0.12538 |
| 24  | H12 | 0.91824 | 0.42877 | 0.18178 | 66  | O14 | 0.30625 | 0.96685 | 0.85350 |
| 25  | H13 | 0.41366 | 0.48439 | 0.77170 | 67  | O15 | 0.80625 | 0.96685 | 0.64650 |

|    |     |         |         |         |    |     |         |         |         |
|----|-----|---------|---------|---------|----|-----|---------|---------|---------|
| 26 | H14 | 0.58494 | 0.57082 | 0.68348 | 68 | O16 | 0.84452 | 0.98268 | 0.37462 |
| 27 | H15 | 0.61189 | 0.56831 | 0.83312 | 69 | O17 | 0.25793 | 0.44206 | 0.04936 |
| 28 | H16 | 0.49593 | 0.65274 | 0.77162 | 70 | O18 | 0.74233 | 0.55770 | 0.95221 |
| 29 | H17 | 0.02348 | 0.23691 | 0.54245 | 71 | O19 | 0.24233 | 0.55770 | 0.54779 |
| 30 | H18 | 0.23053 | 0.24551 | 0.53883 | 72 | O20 | 0.75793 | 0.44206 | 0.45064 |
| 31 | H19 | 0.15659 | 0.29192 | 0.66483 | 73 | O21 | 0.21034 | 0.35387 | 0.80740 |
| 32 | H20 | 0.18901 | 0.38612 | 0.54270 | 74 | O22 | 0.79026 | 0.64788 | 0.19353 |
| 33 | H21 | 0.76809 | 0.75403 | 0.46242 | 75 | O23 | 0.29026 | 0.64788 | 0.30647 |
| 34 | H22 | 0.81041 | 0.61371 | 0.45749 | 76 | O24 | 0.71034 | 0.35387 | 0.69260 |
| 35 | H23 | 0.97545 | 0.76310 | 0.45897 | 77 | O25 | 0.94884 | 0.21888 | 0.98757 |
| 36 | H24 | 0.84313 | 0.70900 | 0.33616 | 78 | O26 | 0.71281 | 0.80332 | 0.00772 |
| 37 | H25 | 0.26809 | 0.75403 | 0.03758 | 79 | O27 | 0.21281 | 0.80332 | 0.49228 |
| 38 | H26 | 0.31041 | 0.61371 | 0.04251 | 80 | O28 | 0.44884 | 0.21888 | 0.51243 |
| 39 | H27 | 0.34313 | 0.70900 | 0.16384 | 81 | O29 | 0.05144 | 0.78164 | 0.01260 |
| 40 | H28 | 0.47545 | 0.76310 | 0.04103 | 82 | O30 | 0.28705 | 0.19655 | 0.99189 |
| 41 | H29 | 0.52348 | 0.23691 | 0.95755 | 83 | O31 | 0.78705 | 0.19655 | 0.50811 |
| 42 | H30 | 0.73053 | 0.24551 | 0.96117 | 84 | O32 | 0.55144 | 0.78164 | 0.48740 |

---

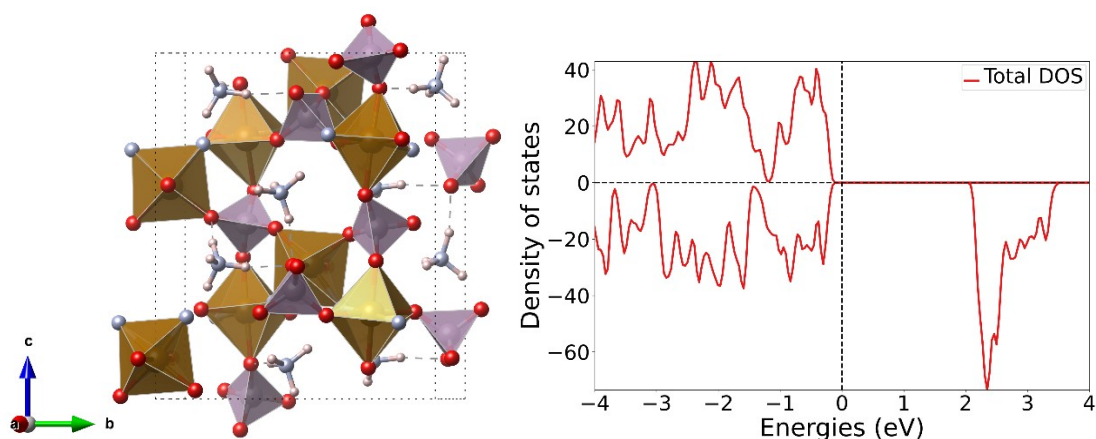

**Figure S22.** Structure diagram and density of states of  $\text{NH}_4\text{Fe}(\text{PO}_4)\text{F}$ .

**Table S28.** Cell parameters of  $\text{NH}_4\text{Fe}(\text{PO}_4)\text{F}$ , ICSD is the ICSD Collection Code, STRU is the chemical formula. The  $a$ ,  $b$ ,  $c$  (Å) and  $\alpha$ ,  $\beta$ ,  $\gamma$  (°) are unit cell parameters.  $V$  (Å<sup>3</sup>) is the cell volume and Structure parameters of  $\text{NH}_4\text{Fe}(\text{PO}_4)\text{F}$ .

| ICSD   | STRU                                        | a    | b     | c     | $\alpha$ | $\beta$ | $\gamma$ | V      |
|--------|---------------------------------------------|------|-------|-------|----------|---------|----------|--------|
| 200613 | $\text{NH}_4\text{Fe}(\text{PO}_4)\text{F}$ | 6.52 | 10.81 | 13.13 | 90.00    | 90.00   | 90.00    | 925.15 |

| NO. | E   | x       | y       | z       | NO. | E   | x       | y       | z       |
|-----|-----|---------|---------|---------|-----|-----|---------|---------|---------|
| 1   | Fe1 | 0.51605 | 0.00218 | 0.61345 | 49  | N1  | 0.84558 | 0.43157 | 0.59594 |
| 2   | Fe2 | 0.48375 | 0.50218 | 0.38667 | 50  | N2  | 0.15402 | 0.93166 | 0.40428 |
| 3   | Fe3 | 0.01625 | 0.50218 | 0.88667 | 51  | N3  | 0.34598 | 0.93166 | 0.90428 |
| 4   | Fe4 | 0.98395 | 0.00218 | 0.11345 | 52  | N4  | 0.65442 | 0.43157 | 0.09594 |
| 5   | Fe5 | 0.25087 | 0.24666 | 0.75355 | 53  | N5  | 0.21798 | 0.70306 | 0.60950 |
| 6   | Fe6 | 0.74916 | 0.74666 | 0.24656 | 54  | N6  | 0.78147 | 0.20303 | 0.39055 |
| 7   | Fe7 | 0.75084 | 0.74666 | 0.74656 | 55  | N7  | 0.71853 | 0.20303 | 0.89055 |
| 8   | Fe8 | 0.24913 | 0.24666 | 0.25355 | 56  | N8  | 0.28202 | 0.70306 | 0.10950 |
| 9   | P1  | 0.00519 | 0.99650 | 0.68546 | 57  | O1  | 0.79832 | 0.72956 | 0.59012 |
| 10  | P2  | 0.99460 | 0.49645 | 0.31464 | 58  | O2  | 0.20155 | 0.22949 | 0.40997 |
| 11  | P3  | 0.50540 | 0.49645 | 0.81464 | 59  | O3  | 0.29845 | 0.22949 | 0.90997 |
| 12  | P4  | 0.49481 | 0.99650 | 0.18546 | 60  | O4  | 0.70168 | 0.72956 | 0.09012 |
| 13  | P5  | 0.33062 | 0.25548 | 0.50701 | 61  | O5  | 0.55036 | 0.60625 | 0.74173 |
| 14  | P6  | 0.66913 | 0.75547 | 0.49311 | 62  | O6  | 0.44993 | 0.10632 | 0.25837 |
| 15  | P7  | 0.83087 | 0.75547 | 0.99311 | 63  | O7  | 0.05007 | 0.10632 | 0.75837 |
| 16  | P8  | 0.16938 | 0.25548 | 0.00701 | 64  | O8  | 0.94964 | 0.60625 | 0.24173 |
| 17  | H1  | 0.96192 | 0.36585 | 0.60360 | 65  | O9  | 0.96442 | 0.87883 | 0.75092 |
| 18  | H2  | 0.83953 | 0.46070 | 0.52010 | 66  | O10 | 0.03542 | 0.37879 | 0.24917 |
| 19  | H3  | 0.87483 | 0.50419 | 0.64435 | 67  | O11 | 0.46458 | 0.37879 | 0.74916 |
| 20  | H4  | 0.70403 | 0.39561 | 0.61484 | 68  | O12 | 0.53558 | 0.87883 | 0.25092 |
| 21  | H5  | 0.03777 | 0.86587 | 0.39662 | 69  | O13 | 0.81672 | 0.02655 | 0.61801 |
| 22  | H6  | 0.12489 | 0.00413 | 0.35571 | 70  | O14 | 0.18310 | 0.52654 | 0.38206 |
| 23  | H7  | 0.29569 | 0.89568 | 0.38562 | 71  | O15 | 0.31690 | 0.52654 | 0.88206 |
| 24  | H8  | 0.15979 | 0.96094 | 0.48008 | 72  | O16 | 0.68328 | 0.02655 | 0.11801 |
| 25  | H9  | 0.46223 | 0.86587 | 0.89662 | 73  | O17 | 0.18966 | 0.26884 | 0.60147 |



|    |     |         |         |         |    |     |         |         |         |
|----|-----|---------|---------|---------|----|-----|---------|---------|---------|
| 26 | H10 | 0.37511 | 0.00413 | 0.85571 | 74 | O18 | 0.81011 | 0.76880 | 0.39865 |
| 27 | H11 | 0.34021 | 0.96094 | 0.98008 | 75 | O19 | 0.68989 | 0.76880 | 0.89865 |
| 28 | H12 | 0.20431 | 0.89568 | 0.88562 | 76 | O20 | 0.31034 | 0.26884 | 0.10147 |
| 29 | H13 | 0.53808 | 0.36585 | 0.10360 | 77 | O21 | 0.48086 | 0.14504 | 0.52452 |
| 30 | H14 | 0.66047 | 0.46070 | 0.02010 | 78 | O22 | 0.51898 | 0.64498 | 0.47569 |
| 31 | H15 | 0.79597 | 0.39561 | 0.11484 | 79 | O23 | 0.98102 | 0.64498 | 0.97569 |
| 32 | H16 | 0.62517 | 0.50419 | 0.14435 | 80 | O24 | 0.01914 | 0.14504 | 0.02452 |
| 33 | H17 | 0.26448 | 0.65919 | 0.67495 | 81 | O25 | 0.19606 | 0.97154 | 0.61543 |
| 34 | H18 | 0.31176 | 0.67257 | 0.55000 | 82 | O26 | 0.80377 | 0.47145 | 0.38470 |
| 35 | H19 | 0.23792 | 0.79744 | 0.61926 | 83 | O27 | 0.69623 | 0.47145 | 0.88470 |
| 36 | H20 | 0.06263 | 0.69090 | 0.59513 | 84 | O28 | 0.30394 | 0.97154 | 0.11543 |
| 37 | H21 | 0.68826 | 0.17277 | 0.45033 | 85 | O29 | 0.46441 | 0.37281 | 0.49246 |
| 38 | H22 | 0.73345 | 0.15930 | 0.32528 | 86 | O30 | 0.53529 | 0.87279 | 0.50763 |
| 39 | H23 | 0.93683 | 0.19042 | 0.40444 | 87 | O31 | 0.96471 | 0.87279 | 0.00763 |
| 40 | H24 | 0.76213 | 0.29749 | 0.38089 | 88 | O32 | 0.03559 | 0.37281 | 0.99246 |
| 41 | H25 | 0.81174 | 0.17277 | 0.95033 | 89 | F1  | 0.52893 | 0.86730 | 0.72000 |
| 42 | H26 | 0.76655 | 0.15930 | 0.82528 | 90 | F2  | 0.47099 | 0.36730 | 0.28011 |
| 43 | H27 | 0.73787 | 0.29749 | 0.88089 | 91 | F3  | 0.02901 | 0.36730 | 0.78011 |
| 44 | H28 | 0.56317 | 0.19042 | 0.90444 | 92 | F4  | 0.97107 | 0.86730 | 0.22000 |
| 45 | H29 | 0.23552 | 0.65919 | 0.17495 | 93 | F5  | 0.46778 | 0.11516 | 0.73622 |
| 46 | H30 | 0.18824 | 0.67257 | 0.05000 | 94 | F6  | 0.53203 | 0.61526 | 0.26398 |
| 47 | H31 | 0.43737 | 0.69090 | 0.09513 | 95 | F7  | 0.96797 | 0.61526 | 0.76398 |
| 48 | H32 | 0.26208 | 0.79744 | 0.11926 | 96 | F8  | 0.03222 | 0.11516 | 0.23622 |

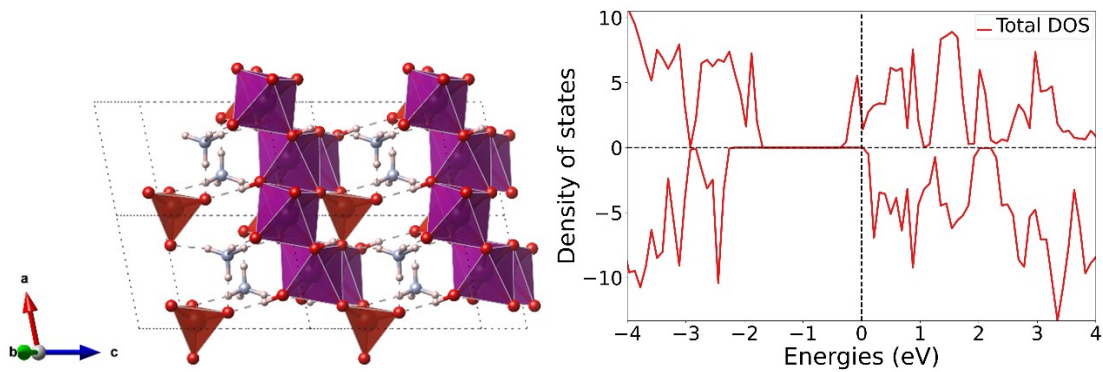

**Figure S23.** Structure diagram and density of states of  $(\text{NH}_4)_2(\text{Mn}_3(\text{OH})_2(\text{VO}_4)_2)$ .

**Table S29.** Cell parameters of  $(\text{NH}_4)_2(\text{Mn}_3(\text{OH})_2(\text{VO}_4)_2)$ , ICSD is the ICSD Collection Code, STRU is the chemical formula. The  $a$ ,  $b$ ,  $c$  ( $\text{\AA}$ ) and  $\alpha$ ,  $\beta$ ,  $\gamma$  ( $^\circ$ ) are unit cell parameters.  $V$  ( $\text{\AA}^3$ ) is the cell volume and Structure parameters of  $(\text{NH}_4)_2(\text{Mn}_3(\text{OH})_2(\text{VO}_4)_2)$ .

| ICSD   | STRU                                                       | $a$  | $b$  | $c$  | $\alpha$ | $\beta$ | $\gamma$ | $V$    |
|--------|------------------------------------------------------------|------|------|------|----------|---------|----------|--------|
| 203214 | $(\text{NH}_4)_2(\text{Mn}_3(\text{OH})_2(\text{VO}_4)_2)$ | 5.54 | 6.37 | 8.21 | 112.86   | 101.09  | 90.00    | 261.09 |

| NO. | E   | x       | y       | z       | NO. | E   | x       | y       | z       |
|-----|-----|---------|---------|---------|-----|-----|---------|---------|---------|
| 1   | N1  | 0.64562 | 0.77014 | 0.54138 | 15  | H8  | 0.54857 | 0.24144 | 0.48333 |
| 2   | N2  | 0.35428 | 0.22914 | 0.45842 | 16  | H9  | 0.76626 | 0.13603 | 0.27194 |
| 3   | Mn1 | 0.99997 | 0.99994 | 0.99990 | 17  | H10 | 0.23367 | 0.86398 | 0.72786 |
| 4   | Mn2 | 0.49998 | 0.73637 | 0.99989 | 18  | O1  | 0.70518 | 0.07015 | 0.14009 |
| 5   | Mn3 | 0.49996 | 0.26354 | 0.99990 | 19  | O2  | 0.29475 | 0.92977 | 0.85970 |
| 6   | V1  | 0.93495 | 0.38088 | 0.76237 | 20  | O3  | 0.79948 | 0.18973 | 0.83565 |
| 7   | V2  | 0.06499 | 0.61893 | 0.23744 | 21  | O4  | 0.79955 | 0.64545 | 0.83562 |
| 8   | H1  | 0.71210 | 0.68044 | 0.62087 | 22  | O5  | 0.20043 | 0.81004 | 0.16410 |
| 9   | H2  | 0.71211 | 0.93944 | 0.62080 | 23  | O6  | 0.20044 | 0.35439 | 0.16425 |
| 10  | H3  | 0.45132 | 0.75778 | 0.51646 | 24  | O7  | 0.85855 | 0.26571 | 0.53241 |
| 11  | H4  | 0.70365 | 0.70918 | 0.41956 | 25  | O8  | 0.14138 | 0.73420 | 0.46740 |
| 12  | H5  | 0.29624 | 0.28996 | 0.58022 | 26  | O9  | 0.26407 | 0.41438 | 0.82918 |
| 13  | H6  | 0.28790 | 0.31905 | 0.37909 | 27  | O10 | 0.73588 | 0.58546 | 0.17062 |
| 14  | H7  | 0.28769 | 0.05987 | 0.37881 |     |     |         |         |         |

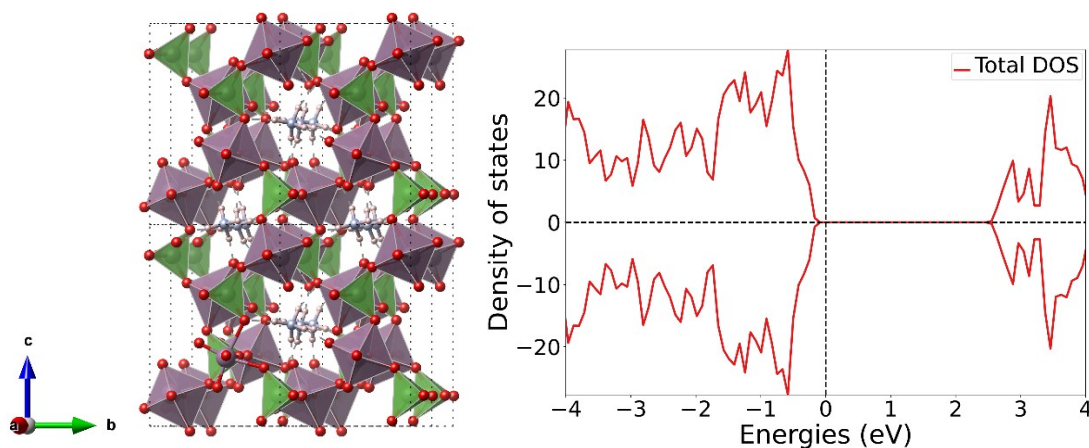

**Figure S24.** Structure diagram and density of states of  $\text{NH}_4(\text{MoO}_2)(\text{AsO}_4)$ .

**Table S30.** Cell parameters of  $\text{NH}_4(\text{MoO}_2)(\text{AsO}_4)$ , ICSD is the ICSD Collection Code, STRU is the chemical formula. The  $a$ ,  $b$ ,  $c$  ( $\text{\AA}$ ) and  $\alpha$ ,  $\beta$ ,  $\gamma$  ( $^\circ$ ) are unit cell parameters.  $V$  ( $\text{\AA}^3$ ) is the cell volume and Structure parameters of  $\text{NH}_4(\text{MoO}_2)(\text{AsO}_4)$ .

| ICSD   | STRU                                      | a    | b    | c     | $\alpha$ | $\beta$ | $\gamma$ | V      |
|--------|-------------------------------------------|------|------|-------|----------|---------|----------|--------|
| 203218 | $\text{NH}_4(\text{MoO}_2)(\text{AsO}_4)$ | 6.72 | 7.29 | 11.07 | 90.00    | 90.00   | 90.00    | 542.13 |

| NO. | E   | x       | y       | z       | NO. | E   | x       | y       | z       |
|-----|-----|---------|---------|---------|-----|-----|---------|---------|---------|
| 1   | Mo1 | 0.24723 | 0.45595 | 0.65966 | 27  | N3  | 0.50462 | 0.00882 | 0.50351 |
| 2   | Mo2 | 0.24723 | 0.04405 | 0.15966 | 28  | N4  | 0.00465 | 0.50878 | 0.99667 |
| 3   | Mo3 | 0.74725 | 0.54409 | 0.34047 | 29  | O1  | 0.95296 | 0.40682 | 0.65246 |
| 4   | Mo4 | 0.74726 | 0.95591 | 0.84047 | 30  | O2  | 0.54112 | 0.09231 | 0.15015 |
| 5   | As1 | 0.74737 | 0.55095 | 0.65333 | 31  | O3  | 0.45299 | 0.59316 | 0.34766 |
| 6   | As2 | 0.74737 | 0.94905 | 0.15333 | 32  | O4  | 0.04115 | 0.90765 | 0.84994 |
| 7   | As3 | 0.24737 | 0.44908 | 0.34679 | 33  | O5  | 0.04115 | 0.59236 | 0.34994 |
| 8   | As4 | 0.24738 | 0.05093 | 0.84679 | 34  | O6  | 0.45300 | 0.90683 | 0.84766 |
| 9   | H1  | 0.92523 | 0.95617 | 0.42007 | 35  | O7  | 0.54112 | 0.40769 | 0.65015 |
| 10  | H2  | 0.91000 | 0.01296 | 0.56958 | 36  | O8  | 0.95295 | 0.09318 | 0.15247 |
| 11  | H3  | 0.08814 | 0.10940 | 0.48120 | 37  | O9  | 0.25051 | 0.16368 | 0.71041 |
| 12  | H4  | 0.09420 | 0.88041 | 0.51716 | 38  | O10 | 0.25050 | 0.33632 | 0.21041 |
| 13  | H5  | 0.40999 | 0.51292 | 0.93058 | 39  | O11 | 0.75051 | 0.83634 | 0.28973 |
| 14  | H6  | 0.42519 | 0.45615 | 0.08010 | 40  | O12 | 0.75052 | 0.66365 | 0.78973 |
| 15  | H7  | 0.58813 | 0.60936 | 0.01897 | 41  | O13 | 0.24438 | 0.31513 | 0.47446 |
| 16  | H8  | 0.59418 | 0.38037 | 0.98303 | 42  | O14 | 0.24439 | 0.18487 | 0.97446 |
| 17  | H9  | 0.40999 | 0.98708 | 0.43058 | 43  | O15 | 0.74442 | 0.68492 | 0.52567 |
| 18  | H10 | 0.42519 | 0.04386 | 0.58010 | 44  | O16 | 0.74442 | 0.81508 | 0.02567 |
| 19  | H11 | 0.59418 | 0.11963 | 0.48303 | 45  | O17 | 0.24268 | 0.66356 | 0.58765 |
| 20  | H12 | 0.58814 | 0.89064 | 0.51897 | 46  | O18 | 0.24267 | 0.83644 | 0.08765 |
| 21  | H13 | 0.92523 | 0.54383 | 0.92007 | 47  | O19 | 0.74275 | 0.33649 | 0.41249 |
| 22  | H14 | 0.91000 | 0.48704 | 0.06958 | 48  | O20 | 0.74275 | 0.16351 | 0.91249 |
| 23  | H15 | 0.09420 | 0.61959 | 0.01716 | 49  | O21 | 0.25299 | 0.52232 | 0.80715 |
| 24  | H16 | 0.08814 | 0.39060 | 0.98120 | 50  | O22 | 0.25299 | 0.97768 | 0.30715 |

|    |    |         |         |         |    |     |         |         |         |
|----|----|---------|---------|---------|----|-----|---------|---------|---------|
| 25 | N1 | 0.00465 | 0.99122 | 0.49667 | 51 | O23 | 0.75299 | 0.47771 | 0.19297 |
| 26 | N2 | 0.50462 | 0.49118 | 0.00351 | 52 | O24 | 0.75299 | 0.02229 | 0.69297 |

---

---

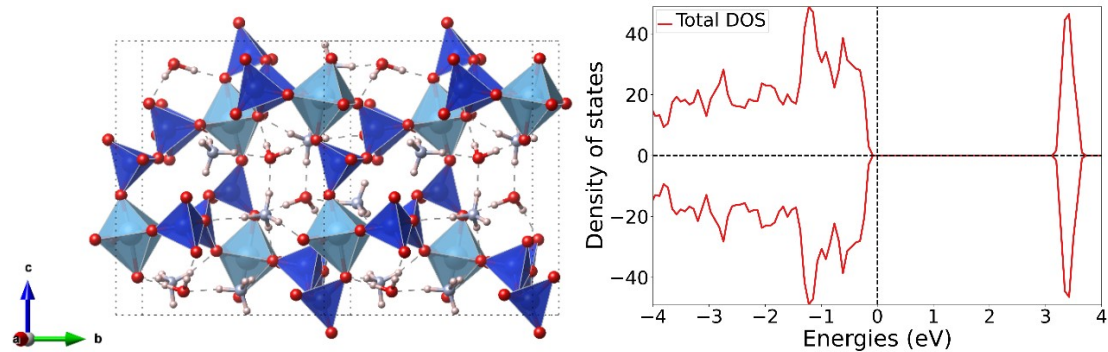

**Figure S25.** Structure diagram and density of states of  $(\text{NH}_4)_2(\text{TiSi}_3\text{O}_9)(\text{H}_2\text{O})$ .

**Table S31.** Cell parameters of  $(\text{NH}_4)_2(\text{TiSi}_3\text{O}_9)(\text{H}_2\text{O})$ , ICSD is the ICSD Collection Code, STRU is the chemical formula. The  $a$ ,  $b$ ,  $c$  ( $\text{\AA}$ ) and  $\alpha$ ,  $\beta$ ,  $\gamma$  ( $^\circ$ ) are unit cell parameters.  $V$  ( $\text{\AA}^3$ ) is the cell volume and Structure parameters of  $(\text{NH}_4)_2(\text{TiSi}_3\text{O}_9)(\text{H}_2\text{O})$ .

| ICSD   | STRU                                                           | $a$  | $b$   | $c$   | $\alpha$ | $\beta$ | $\gamma$ | $V$    |
|--------|----------------------------------------------------------------|------|-------|-------|----------|---------|----------|--------|
| 280327 | $(\text{NH}_4)_2(\text{TiSi}_3\text{O}_9)(\text{H}_2\text{O})$ | 7.34 | 10.20 | 13.18 | 90.00    | 90.00   | 90.00    | 985.68 |

| NO. | E    | x       | y       | z       | NO. | E   | x       | y       | z       |
|-----|------|---------|---------|---------|-----|-----|---------|---------|---------|
| 1   | Ti1  | 0.74258 | 0.96301 | 0.79217 | 53  | H37 | 0.54408 | 0.66621 | 0.61780 |
| 2   | Ti2  | 0.73581 | 0.03638 | 0.29660 | 54  | H38 | 0.94383 | 0.33374 | 0.12911 |
| 3   | Ti3  | 0.24253 | 0.53715 | 0.20783 | 55  | H39 | 0.04406 | 0.83396 | 0.38222 |
| 4   | Ti4  | 0.23585 | 0.46378 | 0.70339 | 56  | H40 | 0.44389 | 0.16641 | 0.87088 |
| 5   | Si1  | 0.73503 | 0.95483 | 0.05133 | 57  | N1  | 0.75434 | 0.43505 | 0.59293 |
| 6   | Si2  | 0.75093 | 0.04395 | 0.55231 | 58  | N2  | 0.72618 | 0.56566 | 0.08908 |
| 7   | Si3  | 0.23504 | 0.54532 | 0.94866 | 59  | N3  | 0.25429 | 0.06511 | 0.40705 |
| 8   | Si4  | 0.25087 | 0.45624 | 0.44770 | 60  | N4  | 0.22626 | 0.93448 | 0.91091 |
| 9   | Si5  | 0.52383 | 0.67390 | 0.82284 | 61  | N5  | 0.87882 | 0.31393 | 0.88241 |
| 10  | Si6  | 0.96445 | 0.32380 | 0.32456 | 62  | N6  | 0.68499 | 0.67747 | 0.36470 |
| 11  | Si7  | 0.02382 | 0.82624 | 0.17716 | 63  | N7  | 0.37876 | 0.18620 | 0.11760 |
| 12  | Si8  | 0.46453 | 0.17639 | 0.67545 | 64  | N8  | 0.18503 | 0.82268 | 0.63531 |
| 13  | Si9  | 0.93541 | 0.65990 | 0.82449 | 65  | O1  | 0.55002 | 0.83147 | 0.80862 |
| 14  | Si10 | 0.55168 | 0.33993 | 0.32717 | 66  | O2  | 0.93673 | 0.16720 | 0.30728 |
| 15  | Si11 | 0.43541 | 0.84025 | 0.17551 | 67  | O3  | 0.04998 | 0.66866 | 0.19134 |
| 16  | Si12 | 0.05175 | 0.16023 | 0.67284 | 68  | O4  | 0.43680 | 0.33298 | 0.69271 |
| 17  | H1   | 0.63673 | 0.40304 | 0.63076 | 69  | O5  | 0.72516 | 0.60314 | 0.84139 |
| 18  | H2   | 0.87170 | 0.39903 | 0.62843 | 70  | O6  | 0.76310 | 0.39626 | 0.34351 |
| 19  | H3   | 0.75425 | 0.53723 | 0.59143 | 71  | O7  | 0.22515 | 0.89699 | 0.15861 |
| 20  | H4   | 0.74872 | 0.40023 | 0.51996 | 72  | O8  | 0.26319 | 0.10393 | 0.65651 |
| 21  | H5   | 0.61161 | 0.60260 | 0.12690 | 73  | O9  | 0.92993 | 0.81755 | 0.80316 |
| 22  | H6   | 0.73026 | 0.46351 | 0.09346 | 74  | O10 | 0.56155 | 0.18155 | 0.31218 |
| 23  | H7   | 0.84587 | 0.60226 | 0.12136 | 75  | O11 | 0.42998 | 0.68260 | 0.19684 |
| 24  | H8   | 0.72130 | 0.59378 | 0.01428 | 76  | O12 | 0.06163 | 0.31861 | 0.68783 |
| 25  | H9   | 0.13669 | 0.09712 | 0.36922 | 77  | O13 | 0.90685 | 0.85375 | 0.07291 |

|    |     |         |         |         |     |     |         |         |         |
|----|-----|---------|---------|---------|-----|-----|---------|---------|---------|
| 26 | H10 | 0.25419 | 0.96293 | 0.40856 | 78  | O14 | 0.58415 | 0.15065 | 0.57177 |
| 27 | H11 | 0.24867 | 0.09993 | 0.48003 | 79  | O15 | 0.40685 | 0.64642 | 0.92709 |
| 28 | H12 | 0.37167 | 0.10111 | 0.37156 | 80  | O16 | 0.08408 | 0.34954 | 0.42824 |
| 29 | H13 | 0.22145 | 0.90632 | 0.98570 | 81  | O17 | 0.94994 | 0.08681 | 0.76684 |
| 30 | H14 | 0.34592 | 0.89788 | 0.87858 | 82  | O18 | 0.53492 | 0.91942 | 0.26714 |
| 31 | H15 | 0.23035 | 0.03663 | 0.90654 | 83  | O19 | 0.44986 | 0.41331 | 0.23316 |
| 32 | H16 | 0.11166 | 0.89756 | 0.87311 | 84  | O20 | 0.03494 | 0.58075 | 0.73285 |
| 33 | H17 | 0.77775 | 0.37140 | 0.85238 | 85  | O21 | 0.73838 | 0.93009 | 0.63908 |
| 34 | H18 | 0.88107 | 0.22219 | 0.84704 | 86  | O22 | 0.73801 | 0.07101 | 0.13743 |
| 35 | H19 | 0.86241 | 0.30495 | 0.96217 | 87  | O23 | 0.23833 | 0.57010 | 0.36092 |
| 36 | H20 | 0.00441 | 0.35844 | 0.86774 | 88  | O24 | 0.23803 | 0.42913 | 0.86257 |
| 37 | H21 | 0.56869 | 0.67800 | 0.31935 | 89  | O25 | 0.54249 | 0.87202 | 0.06789 |
| 38 | H22 | 0.74761 | 0.58733 | 0.35608 | 90  | O26 | 0.94657 | 0.12305 | 0.56618 |
| 39 | H23 | 0.65231 | 0.69197 | 0.44181 | 91  | O27 | 0.04247 | 0.62811 | 0.93211 |
| 40 | H24 | 0.76914 | 0.75238 | 0.33918 | 92  | O28 | 0.44652 | 0.37716 | 0.43384 |
| 41 | H25 | 0.27767 | 0.12873 | 0.14762 | 93  | O29 | 0.56584 | 0.10517 | 0.77114 |
| 42 | H26 | 0.50434 | 0.14168 | 0.13228 | 94  | O30 | 0.91801 | 0.89051 | 0.27431 |
| 43 | H27 | 0.38102 | 0.27794 | 0.15297 | 95  | O31 | 0.06570 | 0.39509 | 0.22889 |
| 44 | H28 | 0.36237 | 0.19519 | 0.03784 | 96  | O32 | 0.41802 | 0.60961 | 0.72570 |
| 45 | H29 | 0.06874 | 0.82215 | 0.68067 | 97  | O33 | 0.74862 | 0.00378 | 0.93450 |
| 46 | H30 | 0.26919 | 0.74777 | 0.66082 | 98  | O34 | 0.73768 | 0.99200 | 0.43624 |
| 47 | H31 | 0.24766 | 0.91282 | 0.64393 | 99  | O35 | 0.24864 | 0.49637 | 0.06549 |
| 48 | H32 | 0.15234 | 0.80818 | 0.55821 | 100 | O36 | 0.23763 | 0.50824 | 0.56376 |
| 49 | H33 | 0.68202 | 0.78545 | 0.59886 | 101 | O37 | 0.64295 | 0.69667 | 0.57196 |
| 50 | H34 | 0.80617 | 0.21248 | 0.10784 | 102 | O38 | 0.84068 | 0.30456 | 0.08497 |
| 51 | H35 | 0.18198 | 0.71472 | 0.40114 | 103 | O39 | 0.14293 | 0.80349 | 0.42806 |
| 52 | H36 | 0.30620 | 0.28765 | 0.89214 | 104 | O40 | 0.34071 | 0.19557 | 0.91501 |

---

---

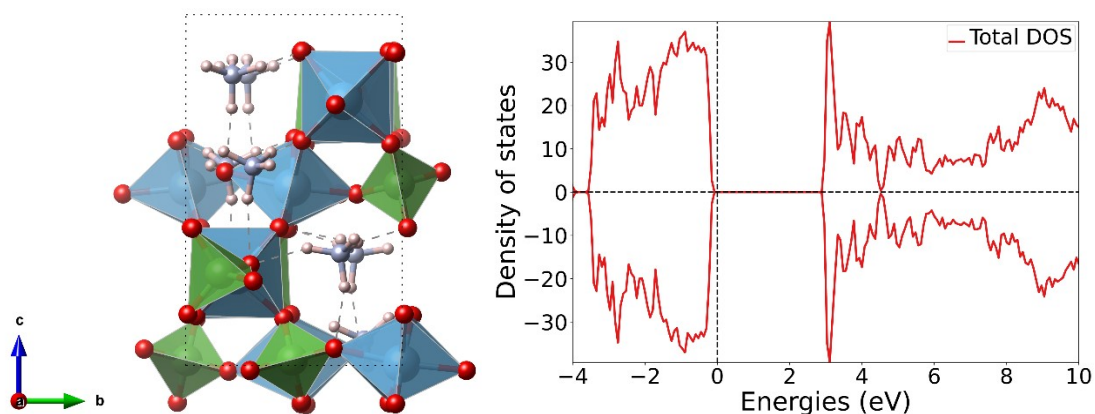

**Figure S26.** Structure diagram and density of states of  $(\text{NH}_4)_2(\text{TiO})_2(\text{As}_{0.43}\text{P}_{0.57}\text{O}_4)_2$ .

**Table S32.** Cell parameters of  $(\text{NH}_4)_2(\text{TiO})_2(\text{As}_{0.43}\text{P}_{0.57}\text{O}_4)_2$ , ICSD is the ICSD Collection Code, STRU is the chemical formula. The a, b, c (Å) and  $\alpha$ ,  $\beta$ ,  $\gamma$  ( $^\circ$ ) are unit cell parameters. V (Å<sup>3</sup>) is the cell volume and Structure parameters of  $(\text{NH}_4)_2(\text{TiO})_2(\text{As}_{0.43}\text{P}_{0.57}\text{O}_4)_2$ .

| ICSD   | STRU                                                                         | a     | b    | c     | $\alpha$ | $\beta$ | $\gamma$ | V      |
|--------|------------------------------------------------------------------------------|-------|------|-------|----------|---------|----------|--------|
| 400850 | $(\text{NH}_4)_2(\text{TiO})_2(\text{As}_{0.43}\text{P}_{0.57}\text{O}_4)_2$ | 13.22 | 6.69 | 10.85 | 89.96    | 89.70   | 89.70    | 959.36 |

| NO. | E   | x       | y       | z       | NO. | E   | x       | y       | z       |
|-----|-----|---------|---------|---------|-----|-----|---------|---------|---------|
| 1   | N1  | 0.88805 | 0.71508 | 0.31900 | 53  | O21 | 0.61080 | 0.79061 | 0.48881 |
| 2   | N2  | 0.12294 | 0.28401 | 0.82803 | 54  | O22 | 0.38841 | 0.19875 | 0.98410 |
| 3   | N3  | 0.62292 | 0.21576 | 0.82775 | 55  | O23 | 0.88690 | 0.29755 | 0.98607 |
| 4   | N4  | 0.38591 | 0.78199 | 0.31712 | 56  | O24 | 0.10990 | 0.70935 | 0.48900 |
| 5   | N5  | 0.59856 | 0.82594 | 0.07277 | 57  | O25 | 0.75906 | 0.94698 | 0.63175 |
| 6   | N6  | 0.39565 | 0.18683 | 0.56517 | 58  | O26 | 0.24193 | 0.04726 | 0.13370 |
| 7   | N7  | 0.89551 | 0.31244 | 0.56687 | 59  | O27 | 0.73944 | 0.45316 | 0.13477 |
| 8   | N8  | 0.10217 | 0.68753 | 0.06105 | 60  | O28 | 0.25877 | 0.55100 | 0.63049 |
| 9   | Ti1 | 0.86781 | 0.99796 | 0.00557 | 61  | O29 | 0.75176 | 0.02529 | 0.39240 |
| 10  | Ti2 | 0.12943 | 0.00747 | 0.50737 | 62  | O30 | 0.24400 | 0.96181 | 0.89533 |
| 11  | Ti3 | 0.62893 | 0.49267 | 0.50753 | 63  | O31 | 0.74330 | 0.53686 | 0.89612 |
| 12  | Ti4 | 0.36940 | 0.49622 | 0.00309 | 64  | O32 | 0.25078 | 0.47360 | 0.39083 |
| 13  | Ti5 | 0.74314 | 0.23142 | 0.25610 | 65  | O33 | 0.77880 | 0.04690 | 0.14202 |
| 14  | Ti6 | 0.25652 | 0.76708 | 0.75198 | 66  | O34 | 0.22387 | 0.96048 | 0.64033 |
| 15  | Ti7 | 0.75446 | 0.72988 | 0.75310 | 67  | O35 | 0.72351 | 0.53698 | 0.64159 |
| 16  | Ti8 | 0.24113 | 0.26904 | 0.25409 | 68  | O36 | 0.27498 | 0.45504 | 0.13774 |
| 17  | As1 | 0.68152 | 0.98637 | 0.51547 | 69  | O37 | 0.71875 | 0.43178 | 0.39279 |
| 18  | As2 | 0.31668 | 0.00522 | 0.01460 | 70  | O38 | 0.27887 | 0.55588 | 0.88830 |
| 19  | As3 | 0.81544 | 0.49269 | 0.01614 | 71  | O39 | 0.77406 | 0.93984 | 0.89412 |
| 20  | As4 | 0.18099 | 0.51259 | 0.51443 | 72  | O40 | 0.21800 | 0.06792 | 0.39118 |
| 21  | As5 | 0.99728 | 0.16049 | 0.26277 | 73  | H1  | 0.82500 | 0.79393 | 0.34980 |
| 22  | As6 | 0.00062 | 0.84197 | 0.76295 | 74  | H2  | 0.88275 | 0.56284 | 0.33413 |
| 23  | As7 | 0.50194 | 0.65850 | 0.76227 | 75  | H3  | 0.95055 | 0.77918 | 0.36017 |

|    |     |         |         |         |     |     |         |         |         |
|----|-----|---------|---------|---------|-----|-----|---------|---------|---------|
| 24 | As8 | 0.49672 | 0.33614 | 0.26217 | 76  | H4  | 0.89325 | 0.73442 | 0.22430 |
| 25 | P1  | 0.68152 | 0.98637 | 0.51547 | 77  | H5  | 0.05382 | 0.28191 | 0.87172 |
| 26 | P2  | 0.31668 | 0.00522 | 0.01460 | 78  | H6  | 0.16261 | 0.15384 | 0.85139 |
| 27 | P3  | 0.81544 | 0.49269 | 0.01614 | 79  | H7  | 0.16729 | 0.40521 | 0.85330 |
| 28 | P4  | 0.18099 | 0.51259 | 0.51443 | 80  | H8  | 0.11250 | 0.28870 | 0.73350 |
| 29 | P5  | 0.99728 | 0.16049 | 0.26277 | 81  | H9  | 0.55377 | 0.21481 | 0.87129 |
| 30 | P6  | 0.00062 | 0.84197 | 0.76295 | 82  | H10 | 0.66873 | 0.09516 | 0.85266 |
| 31 | P7  | 0.50194 | 0.65850 | 0.76227 | 83  | H11 | 0.66092 | 0.34636 | 0.85212 |
| 32 | P8  | 0.49672 | 0.33614 | 0.26217 | 84  | H12 | 0.61257 | 0.21232 | 0.73321 |
| 33 | O1  | 0.98617 | 0.01012 | 0.14638 | 85  | H13 | 0.32277 | 0.70407 | 0.34737 |
| 34 | O2  | 0.01194 | 0.99556 | 0.64750 | 86  | H14 | 0.44822 | 0.71574 | 0.35843 |
| 35 | O3  | 0.51205 | 0.50370 | 0.64722 | 87  | H15 | 0.38041 | 0.93407 | 0.33289 |
| 36 | O4  | 0.48437 | 0.48476 | 0.14520 | 88  | H16 | 0.39157 | 0.76325 | 0.22243 |
| 37 | O5  | 0.01252 | 0.03169 | 0.39091 | 89  | H17 | 0.52251 | 0.82853 | 0.04743 |
| 38 | O6  | 0.98424 | 0.97013 | 0.89115 | 90  | H18 | 0.61210 | 0.68695 | 0.11087 |
| 39 | O7  | 0.48706 | 0.53246 | 0.89154 | 91  | H19 | 0.61200 | 0.93873 | 0.13565 |
| 40 | O8  | 0.51301 | 0.46728 | 0.38926 | 92  | H20 | 0.64561 | 0.84390 | 0.99730 |
| 41 | O9  | 0.89453 | 0.29760 | 0.28729 | 93  | H21 | 0.33794 | 0.10310 | 0.60542 |
| 42 | O10 | 0.10398 | 0.70722 | 0.78409 | 94  | H22 | 0.46499 | 0.11566 | 0.56943 |
| 43 | O11 | 0.60378 | 0.79543 | 0.77917 | 95  | H23 | 0.40638 | 0.32440 | 0.60744 |
| 44 | O12 | 0.39398 | 0.20166 | 0.28746 | 96  | H24 | 0.37911 | 0.21228 | 0.47343 |
| 45 | O13 | 0.09417 | 0.31187 | 0.24087 | 97  | H25 | 0.83637 | 0.39326 | 0.60731 |
| 46 | O14 | 0.90291 | 0.69198 | 0.74310 | 98  | H26 | 0.90988 | 0.17558 | 0.60929 |
| 47 | O15 | 0.40315 | 0.80828 | 0.74181 | 99  | H27 | 0.96306 | 0.38845 | 0.57016 |
| 48 | O16 | 0.59451 | 0.18332 | 0.24130 | 100 | H28 | 0.87886 | 0.28523 | 0.47552 |
| 49 | O17 | 0.61172 | 0.18246 | 0.55125 | 101 | H29 | 0.03206 | 0.62075 | 0.06645 |
| 50 | O18 | 0.38669 | 0.80789 | 0.04684 | 102 | H30 | 0.15906 | 0.60138 | 0.10116 |
| 51 | O19 | 0.88547 | 0.68814 | 0.04905 | 103 | H31 | 0.09315 | 0.82610 | 0.10289 |
| 52 | O20 | 0.11190 | 0.31722 | 0.55102 | 104 | H32 | 0.11863 | 0.71109 | 0.96877 |



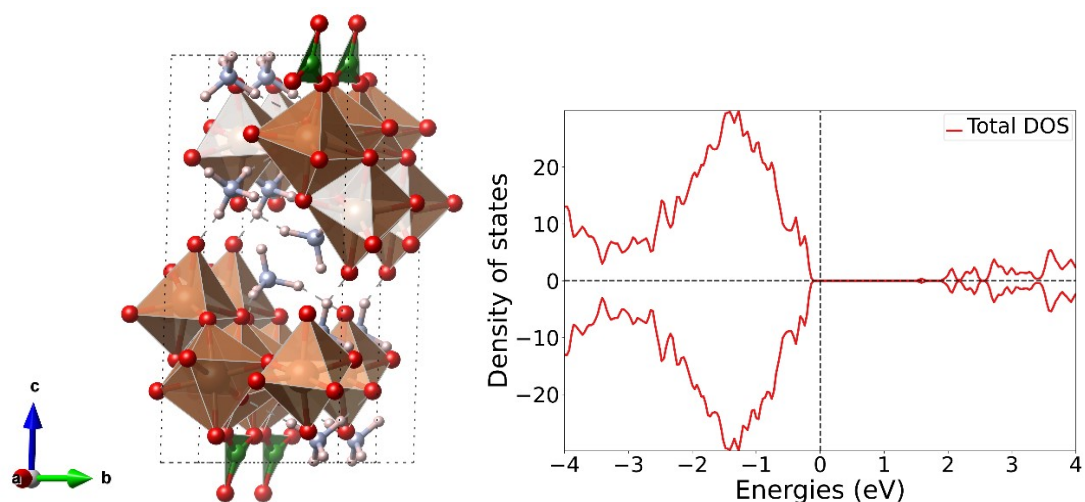

**Figure S27.** Structure diagram and density of states of  $(\text{NH}_4)_3(\text{BSb}_4\text{O}_{13})$ .

**Table S33.** Cell parameters of  $(\text{NH}_4)_3(\text{BSb}_4\text{O}_{13})$ , ICSD is the ICSD Collection Code, STRU is the chemical formula. The  $a$ ,  $b$ ,  $c$  (Å) and  $\alpha$ ,  $\beta$ ,  $\gamma$  ( $^\circ$ ) are unit cell parameters.  $V$  (Å<sup>3</sup>) is the cell volume and Structure parameters of  $(\text{NH}_4)_3(\text{BSb}_4\text{O}_{13})$ .

| ICSD   | STRU                                         | $a$  | $b$  | $c$   | $\alpha$ | $\beta$ | $\gamma$ | $V$    |
|--------|----------------------------------------------|------|------|-------|----------|---------|----------|--------|
| 411501 | $(\text{NH}_4)_3(\text{BSb}_4\text{O}_{13})$ | 7.24 | 7.38 | 13.70 | 83.06    | 80.94   | 62.83    | 642.27 |

| NO. | E   | $x$     | $y$     | $z$     | NO. | E   | $x$     | $y$     | $z$     |
|-----|-----|---------|---------|---------|-----|-----|---------|---------|---------|
| 1   | B1  | 0.16135 | 0.24573 | 0.02283 | 34  | H24 | 0.42171 | 0.61006 | 0.09562 |
| 2   | B2  | 0.83949 | 0.74950 | 0.97858 | 35  | N1  | 0.66454 | 0.29009 | 0.67143 |
| 3   | Sb1 | 0.41319 | 0.95272 | 0.60756 | 36  | N2  | 0.32549 | 0.73995 | 0.32059 |
| 4   | Sb2 | 0.59032 | 0.04067 | 0.39459 | 37  | N3  | 0.94382 | 0.35153 | 0.44966 |
| 5   | Sb3 | 0.84661 | 0.25323 | 0.20757 | 38  | N4  | 0.06257 | 0.63965 | 0.55142 |
| 6   | Sb4 | 0.15374 | 0.74186 | 0.79333 | 39  | N5  | 0.66174 | 0.25329 | 0.94641 |
| 7   | Sb5 | 0.84989 | 0.75302 | 0.21292 | 40  | N6  | 0.33748 | 0.74286 | 0.05438 |
| 8   | Sb6 | 0.15153 | 0.24155 | 0.78871 | 41  | O1  | 0.59853 | 0.08083 | 0.53511 |
| 9   | Sb7 | 0.33256 | 0.26819 | 0.21150 | 42  | O2  | 0.40716 | 0.91043 | 0.46735 |
| 10  | Sb8 | 0.67074 | 0.72676 | 0.79045 | 43  | O3  | 0.77748 | 0.78090 | 0.07735 |
| 11  | H1  | 0.51600 | 0.33995 | 0.71386 | 44  | O4  | 0.22486 | 0.20515 | 0.92492 |
| 12  | H2  | 0.68718 | 0.41944 | 0.65246 | 45  | O5  | 0.95408 | 0.96219 | 0.17577 |
| 13  | H3  | 0.65764 | 0.22075 | 0.61080 | 46  | O6  | 0.04128 | 0.03604 | 0.82109 |
| 14  | H4  | 0.78051 | 0.18427 | 0.71169 | 47  | O7  | 0.66601 | 0.69630 | 0.64426 |
| 15  | H5  | 0.25075 | 0.65012 | 0.32170 | 48  | O8  | 0.33673 | 0.29344 | 0.35771 |
| 16  | H6  | 0.24328 | 0.88107 | 0.28435 | 49  | O9  | 0.74420 | 0.54329 | 0.24544 |
| 17  | H7  | 0.47890 | 0.66358 | 0.28506 | 50  | O10 | 0.26066 | 0.44842 | 0.75854 |
| 18  | H8  | 0.33953 | 0.77293 | 0.39003 | 51  | O11 | 0.75651 | 0.19315 | 0.34998 |
| 19  | H9  | 0.87031 | 0.27712 | 0.42146 | 52  | O12 | 0.24868 | 0.79820 | 0.65105 |
| 20  | H10 | 0.86159 | 0.50724 | 0.43389 | 53  | O13 | 0.56509 | 0.34484 | 0.16146 |
| 21  | H11 | 0.09494 | 0.30640 | 0.41103 | 54  | O14 | 0.43486 | 0.65322 | 0.84009 |
| 22  | H12 | 0.96208 | 0.31611 | 0.52372 | 55  | O15 | 0.12327 | 0.16392 | 0.25576 |

|    |     |         |         |         |    |     |         |         |         |
|----|-----|---------|---------|---------|----|-----|---------|---------|---------|
| 23 | H13 | 0.91175 | 0.68726 | 0.58999 | 56 | O16 | 0.88258 | 0.82411 | 0.74289 |
| 24 | H14 | 0.13676 | 0.71392 | 0.57924 | 57 | O17 | 0.55297 | 0.97921 | 0.25301 |
| 25 | H15 | 0.04583 | 0.67295 | 0.47719 | 58 | O18 | 0.45002 | 0.01494 | 0.74798 |
| 26 | H16 | 0.14287 | 0.48392 | 0.56810 | 59 | O19 | 0.14716 | 0.56130 | 0.20054 |
| 27 | H17 | 0.55949 | 0.19963 | 0.98550 | 60 | O20 | 0.85548 | 0.43463 | 0.80643 |
| 28 | H18 | 0.57798 | 0.38666 | 0.90539 | 61 | O21 | 0.32901 | 0.21590 | 0.07266 |
| 29 | H19 | 0.78077 | 0.15149 | 0.89878 | 62 | O22 | 0.67040 | 0.78595 | 0.92837 |
| 30 | H20 | 0.73619 | 0.28535 | 0.99572 | 63 | O23 | 0.04331 | 0.69585 | 0.93585 |
| 31 | H21 | 0.21622 | 0.84430 | 0.10148 | 64 | O24 | 0.95730 | 0.30107 | 0.06560 |
| 32 | H22 | 0.43880 | 0.79808 | 0.01575 | 65 | O25 | 0.84029 | 0.77181 | 0.36485 |
| 33 | H23 | 0.26534 | 0.70951 | 0.00439 | 66 | O26 | 0.16328 | 0.22287 | 0.63629 |

---

---
